# Supplementary material for: Household clustering and seasonal genetic variation of Plasmodium falciparum at the community-level in The Gambia
Source: eLife. 2025 May 27;13:RP103047. doi: 10.7554/eLife.103047 (PMC12113269; doi:10.7554/eLife.103047)
Supplement: Supplementary file 1. [file elife-103047-supp1.xlsx]

## Sheet: TS1 - Participants
Subject_ID	Gender	Age range (2014)	Village_ID	Household_ID
J0010102	M	55-59	J	J001
J0010103	F	30-34	J	J001
J0010104	F	10-14	J	J001
J0010105	F	40-44	J	J001
J0010106	F	35-39	J	J001
J0010107	F	10-14	J	J001
J0010108	M	10-14	J	J001
J0010109	F	5-9	J	J001
J0010110	M	10-14	J	J001
J0010112	F	65-69	J	J001
J0010113	F	5-9	J	J001
J0010114	F	10-14	J	J001
J0010115	F	40-44	J	J001
J0010116	F	20-24	J	J001
J0010117	F	15-19	J	J001
J0010118	M	10-14	J	J001
J0010119	F	20-24	J	J001
J0010120	F	50-54	J	J001
J0010121	M	10-14	J	J001
J0010122	F	10-14	J	J001
J0010123	F	10-14	J	J001
J0010125	F	20-24	J	J001
J0010126	M	15-19	J	J001
J0010127	F	55-59	J	J001
J0010128	F	15-19	J	J001
J0010129	M	0-4	J	J001
J0010130	M	5-9	J	J001
J0020201	M	55-59	J	J002
J0020202	F	5-9	J	J002
J0020203	F	40-44	J	J002
J0020204	F	5-9	J	J002
J0020205	M	0-4	J	J002
J0020206	F	50-54	J	J002
J0020207	F	10-14	J	J002
J0020208	M	10-14	J	J002
J0020209	M	5-9	J	J002
J0020301	F	35-39	J	J002
J0020302	F	15-19	J	J002
J0020303	M	25-29	J	J002
J0020305	M	45-49	J	J002
J0020306	F	35-39	J	J002
J0020308	F	5-9	J	J002
J0020309	M	0-4	J	J002
J0020310	F	25-29	J	J002
J0020311	M	5-9	J	J002
J0020312	M	5-9	J	J002
J0020313	M	10-14	J	J002
J0020314	M	5-9	J	J002
J0020315	M	0-4	J	J002
J0020316	F	25-29	J	J002
J0020317	M	0-4	J	J002
J0020318	M	5-9	J	J002
J0020319	F	NA	J	J002
J0020321	F	25-29	J	J002
J0020322	F	65-69	J	J002
J0020323	M	40-44	J	J002
J0020324	F	55-59	J	J002
J0020325	F	5-9	J	J002
J0020326	M	50-54	J	J002
J0020327	M	30-34	J	J002
J0020328	M	30-34	J	J002
J0020329	F	15-19	J	J002
J0020330	M	0-4	J	J002
J0020331	M	0-4	J	J002
J0030402	F	20-24	J	J003
J0030405	M	5-9	J	J003
J0030406	M	10-14	J	J003
J0030407	M	10-14	J	J003
J0030408	M	5-9	J	J003
J0030409	F	5-9	J	J003
J0030411	F	25-29	J	J003
J0030412	M	35-39	J	J003
J0030413	M	30-34	J	J003
J0030415	F	25-29	J	J003
J0030416	NA	NA	J	J003
J0030417	F	60-64	J	J003
J0030420	F	50-54	J	J003
J0040502	F	45-49	J	J004
J0040503	F	20-24	J	J004
J0040504	F	15-19	J	J004
J0040505	F	65-69	J	J004
J0050602	F	65-69	J	J005
J0050603	F	20-24	J	J005
J0050604	F	55-59	J	J005
J0050605	F	20-24	J	J005
J0050606	M	0-4	J	J005
J0050607	F	30-34	J	J005
J0050608	F	0-4	J	J005
J0050610	M	40-44	J	J005
J0050611	M	10-14	J	J005
J0050612	M	15-19	J	J005
J0050613	M	10-14	J	J005
J0050614	M	5-9	J	J005
J0050615	M	10-14	J	J005
J0050616	M	30-34	J	J005
J0050617	F	35-39	J	J005
J0050618	M	35-39	J	J005
J0050619	F	5-9	J	J005
J0060701	M	35-39	J	J006
J0060702	M	35-39	J	J006
J0060703	M	10-14	J	J006
J0060704	M	5-9	J	J006
J0060706	M	0-4	J	J006
J0060707	M	55-59	J	J006
J0070802	M	65-69	J	J007
J0070804	F	10-14	J	J007
J0070805	M	5-9	J	J007
J0070806	M	15-19	J	J007
J0080901	F	25-29	J	J008
J0080902	F	5-9	J	J008
J0080903	M	0-4	J	J008
J0080905	NA	NA	J	J008
J0080906	M	30-34	J	J008
J0080908	M	10-14	J	J008
J0091001	F	55-59	J	J009
J0091002	M	10-14	J	J009
J0091003	M	10-14	J	J009
J0091004	F	55-59	J	J009
J0091005	M	15-19	J	J009
J0091006	F	20-24	J	J009
J0101101	F	55-59	J	J010
J0101102	F	10-14	J	J010
J0101103	M	30-34	J	J010
J0101104	M	10-14	J	J010
J0101105	M	5-9	J	J010
J0101106	F	5-9	J	J010
J0101107	M	5-9	J	J010
J0101108	M	45-49	J	J010
J0101109	M	10-14	J	J010
J0101110	M	0-4	J	J010
J0101111	M	5-9	J	J010
J0101112	F	20-24	J	J010
J0111201	M	45-49	J	J011
J0111202	M	25-29	J	J011
J0111203	M	20-24	J	J011
J0111204	M	5-9	J	J011
J0111205	F	45-49	J	J011
J0111206	F	15-19	J	J011
J0111207	F	5-9	J	J011
J0111208	F	20-24	J	J011
J0111209	F	5-9	J	J011
J0111210	F	0-4	J	J011
J0111211	F	10-14	J	J011
J0121302	M	30-34	J	J012
J0121303	M	0-4	J	J012
J0121304	F	5-9	J	J012
J0121305	F	25-29	J	J012
J0121306	M	20-24	J	J012
J0121307	M	25-29	J	J012
J0121308	M	NA	J	J012
J0121309	F	45-49	J	J012
J0121310	F	10-14	J	J012
J0121311	M	0-4	J	J012
J0121312	M	5-9	J	J012
J0121313	F	15-19	J	J012
J0121317	M	20-24	J	J012
J0121318	M	60-64	J	J012
J0121319	M	10-14	J	J012
J0131401	F	60-64	J	J013
J0131402	F	5-9	J	J013
J0131403	M	5-9	J	J013
J0131404	F	0-4	J	J013
J0131405	M	30-34	J	J013
J0131406	M	35-39	J	J013
J0141501	M	45-49	J	J014
J0141502	F	5-9	J	J014
J0141503	F	5-9	J	J014
J0141504	M	10-14	J	J014
J0141505	M	5-9	J	J014
J0141506	M	5-9	J	J014
J0141507	M	0-4	J	J014
J0141508	F	20-24	J	J014
J0141509	F	35-39	J	J014
J0141510	F	0-4	J	J014
J0141511	F	30-34	J	J014
J0141512	M	0-4	J	J014
J0141513	M	10-14	J	J014
J0141514	F	15-19	J	J014
J0141515	M	15-19	J	J014
J0141516	NA	NA	J	J014
J0151601	M	40-44	J	J015
J0151602	F	35-39	J	J015
J0151603	M	0-4	J	J015
J0151604	F	65-69	J	J015
J0151605	F	5-9	J	J015
J0151606	F	5-9	J	J015
J0151607	F	0-4	J	J015
J0151608	F	30-34	J	J015
J0151609	F	20-24	J	J015
J0151610	M	5-9	J	J015
J0151612	F	5-9	J	J015
J0151613	M	10-14	J	J015
J0151614	M	5-9	J	J015
J0151615	M	35-39	J	J015
J0151616	M	50-54	J	J015
J0151617	M	15-19	J	J015
J0161701	M	NA	J	J016
J0161702	M	15-19	J	J016
J0161703	M	10-14	J	J016
J0161704	M	5-9	J	J016
J0161705	M	NA	J	J016
J0161706	M	0-4	J	J016
J0161707	F	25-29	J	J016
J0161708	M	45-49	J	J016
J0161709	F	5-9	J	J016
J0161710	F	10-14	J	J016
J0161711	M	NA	J	J016
J0161713	M	NA	J	J016
J0171801	M	20-24	J	J017
J0171802	F	60-64	J	J017
J0171803	F	20-24	J	J017
J0171804	M	0-4	J	J017
J0171805	M	25-29	J	J017
J0171806	M	15-19	J	J017
J0181901	F	40-44	J	J018
J0181902	F	5-9	J	J018
J0181903	F	5-9	J	J018
J0181904	F	5-9	J	J018
J0181905	F	5-9	J	J018
J0181906	M	0-4	J	J018
J0181907	F	10-14	J	J018
J0181908	F	15-19	J	J018
J0181909	NA	NA	J	J018
J0181910	F	20-24	J	J018
J0181911	M	5-9	J	J018
J0181912	M	5-9	J	J018
J0192001	M	70-74	J	J019
J0202101	NA	NA	J	J020
J0202102	F	10-14	J	J020
J0202103	F	10-14	J	J020
J0202104	F	35-39	J	J020
J0202105	M	20-24	J	J020
J0202106	F	20-24	J	J020
J0202107	F	15-19	J	J020
J0202110	M	45-49	J	J020
J0202111	F	0-4	J	J020
J0202113	M	55-59	J	J020
J0212201	F	50-54	J	J021
J0212203	F	20-24	J	J021
J0212204	F	15-19	J	J021
J0212205	M	15-19	J	J021
J0222301	M	10-14	J	J022
J0222302	M	15-19	J	J022
J0222303	F	35-39	J	J022
J0222304	F	0-4	J	J022
J0222305	F	5-9	J	J022
J0222306	M	50-54	J	J022
J0232401	M	45-49	J	J023
J0232402	M	10-14	J	J023
J0232403	F	5-9	J	J023
J0232404	M	5-9	J	J023
J0232405	F	0-4	J	J023
J0232406	F	NA	J	J023
J0232408	M	5-9	J	J023
J0232410	NA	NA	J	J023
J0232411	F	10-14	J	J023
J0232414	F	30-34	J	J023
J0242501	M	50-54	J	J024
J0242502	F	10-14	J	J024
J0242505	M	5-9	J	J024
J0242506	F	10-14	J	J024
J0242507	F	30-34	J	J024
J0242508	F	10-14	J	J024
J0242509	F	5-9	J	J024
J0242510	M	10-14	J	J024
J0242511	M	15-19	J	J024
J0242512	M	10-14	J	J024
J0242513	M	15-19	J	J024
J0242514	F	NA	J	J024
J0242515	M	5-9	J	J024
J0242516	M	10-14	J	J024
J0242517	F	25-29	J	J024
J0242518	M	50-54	J	J024
J0242519	M	0-4	J	J024
J0242520	F	5-9	J	J024
J0242521	F	20-24	J	J024
J0252602	F	5-9	J	J025
J0252603	F	5-9	J	J025
J0252605	F	45-49	J	J025
J0252608	F	5-9	J	J025
J0252609	M	5-9	J	J025
J0252610	F	20-24	J	J025
J0252611	M	0-4	J	J025
J0252612	F	15-19	J	J025
J0252613	F	15-19	J	J025
J0252614	F	15-19	J	J025
J0252616	F	50-54	J	J025
J0252617	F	30-34	J	J025
J0252618	F	0-4	J	J025
J0252619	F	30-34	J	J025
J0252620	M	25-29	J	J025
J0252621	M	20-24	J	J025
J0262702	M	40-44	J	J026
J0262703	M	10-14	J	J026
J0262704	M	10-14	J	J026
J0262705	F	15-19	J	J026
J0262706	M	55-59	J	J026
J0262707	M	10-14	J	J026
J0262708	M	5-9	J	J026
J0262709	M	10-14	J	J026
J0262710	F	5-9	J	J026
J0262711	M	15-19	J	J026
J0262712	F	5-9	J	J026
J0262713	M	5-9	J	J026
J0262714	M	5-9	J	J026
J0262715	M	50-54	J	J026
J0262716	F	5-9	J	J026
J0262717	F	0-4	J	J026
J0262718	F	5-9	J	J026
J0262719	F	20-24	J	J026
J0262720	F	5-9	J	J026
J0262721	M	5-9	J	J026
J0262722	F	20-24	J	J026
J0262723	F	10-14	J	J026
J0262724	F	10-14	J	J026
J0262725	F	5-9	J	J026
J0262726	M	10-14	J	J026
J0262727	M	15-19	J	J026
J0262728	M	10-14	J	J026
J0262729	M	0-4	J	J026
J0262730	M	5-9	J	J026
J0262731	NA	NA	J	J026
J0262732	F	30-34	J	J026
J0262733	F	30-34	J	J026
J0262734	M	30-34	J	J026
J0262735	M	5-9	J	J026
J0262739	F	65-69	J	J026
J0262740	F	35-39	J	J026
J0262741	M	10-14	J	J026
J0262742	F	20-24	J	J026
J0262743	F	20-24	J	J026
J0262744	M	35-39	J	J026
J0262745	M	NA	J	J026
J0262746	F	NA	J	J026
J0272801	F	20-24	J	J027
J0272802	F	50-54	J	J027
J0272803	F	5-9	J	J027
J0272804	F	5-9	J	J027
J0272805	M	50-54	J	J027
J0272806	F	10-14	J	J027
J0272807	F	NA	J	J027
J0272808	F	0-4	J	J027
J0272809	M	30-34	J	J027
J0272810	F	50-54	J	J027
J0272811	F	70-74	J	J027
J0272812	M	35-39	J	J027
J0272813	M	5-9	J	J027
J0272814	M	30-34	J	J027
J0272815	F	10-14	J	J027
J0272902	NA	NA	J	J027
J0282111	NA	NA	J	J028
J0282902	F	35-39	J	J028
J0282904	NA	0-4	J	J028
J0282906	F	5-9	J	J028
J0282907	F	10-14	J	J028
J0282908	M	30-34	J	J028
J0282909	M	10-14	J	J028
J0282910	F	10-14	J	J028
J0282911	M	5-9	J	J028
J0282912	F	5-9	J	J028
J0282914	F	5-9	J	J028
J0282915	F	0-4	J	J028
J0282916	M	15-19	J	J028
J0282917	M	45-49	J	J028
K0010101	F	25-29	K	K001
K0010102	F	0-4	K	K001
K0010103	F	5-9	K	K001
K0010105	M	10-14	K	K001
K0010106	M	35-39	K	K001
K0010109	F	0-4	K	K001
K0020201	F	45-49	K	K002
K0020202	M	5-9	K	K002
K0020203	M	55-59	K	K002
K0020204	F	15-19	K	K002
K0020205	M	5-9	K	K002
K0020206	M	10-14	K	K002
K0022008	NA	NA	K	K002
K0030301	M	NA	K	K003
K0030302	M	5-9	K	K003
K0030303	M	5-9	K	K003
K0030304	M	60-64	K	K003
K0030305	M	30-34	K	K003
K0030306	M	10-14	K	K003
K0030307	M	0-4	K	K003
K0050501	M	0-4	K	K005
K0050502	F	30-34	K	K005
K0050503	M	10-14	K	K005
K0050504	M	0-4	K	K005
K0050505	F	10-14	K	K005
K0050506	M	10-14	K	K005
K0050507	F	15-19	K	K005
K0050508	F	15-19	K	K005
K0050509	M	10-14	K	K005
K0050510	F	5-9	K	K005
K0050512	M	5-9	K	K005
K0050513	M	10-14	K	K005
K0050516	M	50-54	K	K005
K0050519	F	NA	K	K005
K0050520	F	20-24	K	K005
K0050521	M	0-4	K	K005
K0060601	F	55-59	K	K006
K0060602	F	NA	K	K006
K0060604	F	NA	K	K006
K0060605	F	NA	K	K006
K0060606	F	NA	K	K006
K0060607	F	NA	K	K006
K0060609	M	15-19	K	K006
K0060610	M	5-9	K	K006
K0060611	F	10-14	K	K006
K0060613	F	5-9	K	K006
K0060614	F	15-19	K	K006
K0060615	F	15-19	K	K006
K0060616	F	15-19	K	K006
K0060617	F	10-14	K	K006
K0060619	F	30-34	K	K006
K0070701	M	NA	K	K007
K0070703	M	NA	K	K007
K0070705	F	50-54	K	K007
K0070706	M	NA	K	K007
K0070707	F	20-24	K	K007
K0070708	M	0-4	K	K007
K0070709	M	0-4	K	K007
K0070710	F	20-24	K	K007
K0070711	F	50-54	K	K007
K0070712	F	25-29	K	K007
K0070713	F	10-14	K	K007
K0070714	F	10-14	K	K007
K0070715	M	0-4	K	K007
K0070720	F	10-14	K	K007
K0070721	F	5-9	K	K007
K0070722	F	50-54	K	K007
K0070723	M	30-34	K	K007
K0080802	F	10-14	K	K008
K0080803	F	5-9	K	K008
K0080804	F	5-9	K	K008
K0080807	F	0-4	K	K008
K0080808	F	30-34	K	K008
K0080809	M	15-19	K	K008
K0080810	M	0-4	K	K008
K0090901	F	0-4	K	K009
K0090902	F	5-9	K	K009
K0090903	F	5-9	K	K009
K0090904	M	5-9	K	K009
K0090905	F	35-39	K	K009
K0090906	M	10-14	K	K009
K0090907	M	0-4	K	K009
K0090908	F	30-34	K	K009
K0090909	M	15-19	K	K009
K0101001	F	20-24	K	K010
K0101002	F	0-4	K	K010
K0101003	M	5-9	K	K010
K0101004	M	5-9	K	K010
K0101005	M	5-9	K	K010
K0101006	F	10-14	K	K010
K0101007	M	40-44	K	K010
K0101009	M	15-19	K	K010
K0101010	M	0-4	K	K010
K0111101	M	40-44	K	K011
K0111102	F	35-39	K	K011
K0111103	F	0-4	K	K011
K0111104	M	30-34	K	K011
K0111105	F	5-9	K	K011
K0111106	M	15-19	K	K011
K0111108	F	0-4	K	K011
K0111109	M	5-9	K	K011
K0111110	F	15-19	K	K011
K0111111	M	10-14	K	K011
K0111112	F	70-74	K	K011
K0121201	F	0-4	K	K012
K0121202	M	35-39	K	K012
K0121203	M	5-9	K	K012
K0121204	F	10-14	K	K012
K0121205	F	10-14	K	K012
K0121206	F	10-14	K	K012
K0121207	M	35-39	K	K012
K0121208	M	20-24	K	K012
K0121209	M	10-14	K	K012
K0121210	M	50-54	K	K012
K0121212	F	15-19	K	K012
K0121213	F	15-19	K	K012
K0131301	F	55-59	K	K013
K0131302	M	15-19	K	K013
K0131303	M	15-19	K	K013
K0131305	F	15-19	K	K013
K0131307	F	20-24	K	K013
K0141401	M	5-9	K	K014
K0141402	M	0-4	K	K014
K0141403	M	5-9	K	K014
K0141404	M	5-9	K	K014
K0141405	M	10-14	K	K014
K0141406	F	25-29	K	K014
K0151501	F	45-49	K	K015
K0151502	M	15-19	K	K015
K0151503	M	5-9	K	K015
K0151504	F	10-14	K	K015
K0151505	M	10-14	K	K015
K0151506	F	5-9	K	K015
K0151507	F	20-24	K	K015
K0151508	M	5-9	K	K015
K0151509	F	5-9	K	K015
K0151510	F	5-9	K	K015
K0151511	F	5-9	K	K015
K0151512	F	5-9	K	K015
K0151513	F	10-14	K	K015
K0151514	F	15-19	K	K015
K0151515	F	30-34	K	K015
K0151516	F	25-29	K	K015
K0151518	M	40-44	K	K015
K0151520	M	0-4	K	K015
K0151521	F	0-4	K	K015
K0161601	F	40-44	K	K016
K0161602	F	10-14	K	K016
K0161603	F	30-34	K	K016
K0161604	M	0-4	K	K016
K0161605	F	20-24	K	K016
K0161607	F	20-24	K	K016
K0161608	F	60-64	K	K016
K0161609	M	10-14	K	K016
K0161610	F	10-14	K	K016
K0161611	F	0-4	K	K016
K0161612	F	20-24	K	K016
K0161613	M	0-4	K	K016
K0161614	F	20-24	K	K016
K0161615	F	5-9	K	K016
K0161617	M	0-4	K	K016
K0161618	F	0-4	K	K016
K0161619	F	25-29	K	K016
K0161620	F	25-29	K	K016
K0161621	M	15-19	K	K016
K0161623	F	10-14	K	K016
K0161624	F	NA	K	K016
K0161625	F	10-14	K	K016
K0161626	M	25-29	K	K016
K0161627	F	0-4	K	K016
K0161628	M	0-4	K	K016
K0161629	F	0-4	K	K016
K0161630	M	0-4	K	K016
K0171701	M	0-4	K	K017
K0171702	F	25-29	K	K017
K0171703	F	5-9	K	K017
K0171704	F	0-4	K	K017
K0171705	F	5-9	K	K017
K0171707	M	5-9	K	K017
K0171708	M	10-14	K	K017
K0171709	F	30-34	K	K017
K0171710	M	5-9	K	K017
K0171711	F	0-4	K	K017
K0171712	M	10-14	K	K017
K0171713	F	5-9	K	K017
K0171714	F	20-24	K	K017
K0171715	F	0-4	K	K017
K0171716	M	10-14	K	K017
K0171717	M	0-4	K	K017
K0171718	M	5-9	K	K017
K0171719	F	15-19	K	K017
K0171720	M	5-9	K	K017
K0171721	M	5-9	K	K017
K0171722	F	30-34	K	K017
K0171723	M	5-9	K	K017
K0171724	F	20-24	K	K017
K0171725	F	25-29	K	K017
K0171726	M	10-14	K	K017
K0171727	M	10-14	K	K017
K0171728	M	10-14	K	K017
K0171729	F	45-49	K	K017
K0171730	F	40-44	K	K017
K0171731	F	45-49	K	K017
K0171732	M	45-49	K	K017
K0171733	M	65-69	K	K017
K0171736	F	5-9	K	K017
K0171737	M	35-39	K	K017
K0171738	F	20-24	K	K017
K0171739	M	70-74	K	K017
K0171740	F	0-4	K	K017
K0171741	F	10-14	K	K017
K0171742	M	0-4	K	K017
K0171743	M	0-4	K	K017
K0171744	F	0-4	K	K017
K0171745	F	0-4	K	K017
K0171747	M	0-4	K	K017
K0181801	M	5-9	K	K018
K0181803	M	0-4	K	K018
K0181804	M	5-9	K	K018
K0181807	F	30-34	K	K018
K0181808	M	10-14	K	K018
K0181809	M	0-4	K	K018
K0181810	F	30-34	K	K018
K0181811	F	15-19	K	K018
K0181812	M	NA	K	K018
K0181813	F	15-19	K	K018
K0181814	F	10-14	K	K018
K0181815	M	5-9	K	K018
K0181816	M	0-4	K	K018
K0181817	F	0-4	K	K018
K0181818	F	0-4	K	K018
K0181819	F	0-4	K	K018
K0191901	M	0-4	K	K019
K0191903	F	5-9	K	K019
K0191904	F	20-24	K	K019
K0191905	F	NA	K	K019
K0191906	M	NA	K	K019
K0191907	F	10-14	K	K019
K0191909	F	20-24	K	K019
K0191912	M	25-29	K	K019
K0191913	M	25-29	K	K019
K0191914	F	20-24	K	K019
K0191915	M	5-9	K	K019
K0202001	M	NA	K	K020
K0202002	M	NA	K	K020
K0202003	M	NA	K	K020
K0202004	F	45-49	K	K020
K0202005	F	5-9	K	K020
K0202006	F	15-19	K	K020
K0202007	F	20-24	K	K020
K0202008	M	15-19	K	K020
K0202009	M	10-14	K	K020
K0202010	M	15-19	K	K020
K0202011	M	5-9	K	K020
K0202012	M	10-14	K	K020
K0202013	F	NA	K	K020
K0202014	F	NA	K	K020
K0202015	F	NA	K	K020
K0202017	F	45-49	K	K020
K0202018	F	20-24	K	K020
K0202019	F	0-4	K	K020
K0212101	M	NA	K	K021
K0212102	F	35-39	K	K021
K0212103	F	5-9	K	K021
K0212104	F	30-34	K	K021
K0212106	F	15-19	K	K021
K0212107	F	15-19	K	K021
K0212108	M	25-29	K	K021
K0212109	M	15-19	K	K021
K0212110	M	0-4	K	K021
K0212111	F	15-19	K	K021
K0212112	M	0-4	K	K021
K0212205	NA	NA	K	K021
K0222201	M	70-74	K	K022
K0222202	M	25-29	K	K022
K0222203	M	15-19	K	K022
K0222204	M	10-14	K	K022
K0222205	F	NA	K	K022
K0222206	M	5-9	K	K022
K0222207	F	5-9	K	K022
K0222208	F	10-14	K	K022
K0222209	F	5-9	K	K022
K0222211	F	40-44	K	K022
K0222212	F	40-44	K	K022
K0222213	F	30-34	K	K022
K0222214	M	0-4	K	K022
K0222215	F	0-4	K	K022
K0222216	F	0-4	K	K022
K0222315	M	10-14	K	K022
K0232403	F	15-19	K	K023
K0232404	M	10-14	K	K023
K0232405	F	40-44	K	K023
K0232406	F	40-44	K	K023
K0232408	F	20-24	K	K023
K0232409	M	35-39	K	K023
K0232410	F	15-19	K	K023
K0232411	F	25-29	K	K023
K0232412	F	20-24	K	K023
K0232413	M	10-14	K	K023
K0232414	M	30-34	K	K023
K0242501	M	70-74	K	K024
K0242502	F	45-49	K	K024
K0242504	F	65-69	K	K024
K0242505	M	5-9	K	K024
K0242506	M	5-9	K	K024
K0242507	M	5-9	K	K024
K0242508	F	10-14	K	K024
K0242509	M	0-4	K	K024
K0242510	F	30-34	K	K024
K0242511	M	5-9	K	K024
K0242512	F	30-34	K	K024
K0242513	M	50-54	K	K024
K0242514	M	15-19	K	K024
K0242515	M	10-14	K	K024
K0242516	M	5-9	K	K024
K0242517	F	10-14	K	K024
K0242518	M	0-4	K	K024
K0242519	F	0-4	K	K024
K0242520	F	0-4	K	K024
K0252601	F	70-74	K	K025
K0252602	F	40-44	K	K025
K0252603	M	15-19	K	K025
K0252604	F	5-9	K	K025
K0252606	NA	NA	K	K025
K0252607	M	5-9	K	K025
K0252608	F	5-9	K	K025
K0252611	F	20-24	K	K025
K0252612	M	5-9	K	K025
K0252613	M	5-9	K	K025
K0252614	M	0-4	K	K025
K0252615	M	15-19	K	K025
K0252618	M	NA	K	K025
K0252619	F	NA	K	K025
K0252620	M	NA	K	K025
K0252621	F	0-4	K	K025
K0252622	F	NA	K	K025
K0252623	M	0-4	K	K025
K0252701	M	5-9	K	K025
K0252702	M	0-4	K	K025
K0252703	F	5-9	K	K025
K0252704	F	0-4	K	K025
K0252705	F	5-9	K	K025
K0252706	F	5-9	K	K025
K0252707	F	10-14	K	K025
K0252708	F	5-9	K	K025
K0252709	F	20-24	K	K025
K0252710	M	50-54	K	K025
K0252711	F	5-9	K	K025
K0252712	M	10-14	K	K025
K0252713	F	10-14	K	K025
K0252714	M	0-4	K	K025
K0252715	F	30-34	K	K025
K0252717	M	35-39	K	K025
K0252718	M	5-9	K	K025
K0252719	F	15-19	K	K025
K0252720	F	0-4	K	K025
K0252721	F	30-34	K	K025
K0252722	M	35-39	K	K025
K0252723	F	40-44	K	K025
K0252724	M	10-14	K	K025
K0252725	M	NA	K	K025
K0252726	F	NA	K	K025
K0252727	M	0-4	K	K025
K0252728	M	0-4	K	K025
K0252801	F	15-19	K	K025
K0252802	F	35-39	K	K025
K0252803	M	5-9	K	K025
K0252805	M	50-54	K	K025
K0252806	F	30-34	K	K025
K0252807	F	NA	K	K025
K0252808	M	5-9	K	K025
K0252809	M	10-14	K	K025
K0252810	F	15-19	K	K025
K0252812	F	15-19	K	K025
K0252813	F	25-29	K	K025
K0252814	M	5-9	K	K025
K0252815	F	15-19	K	K025
K0252816	F	15-19	K	K025
K0252817	F	15-19	K	K025
K0252819	F	0-4	K	K025
K0252820	NA	70-74	K	K025
K0252821	F	30-34	K	K025
K0252822	F	40-44	K	K025
K0252823	F	5-9	K	K025
K0252824	F	0-4	K	K025
K0252825	M	5-9	K	K025
K0252826	F	20-24	K	K025
K0252827	F	15-19	K	K025
K0262901	F	45-49	K	K026
K0262902	F	15-19	K	K026
K0262903	M	20-24	K	K026
K0262904	F	35-39	K	K026
K0262905	F	20-24	K	K026
K0262906	F	5-9	K	K026
K0262907	M	5-9	K	K026
K0262908	F	0-4	K	K026
K0262910	M	5-9	K	K026
K0262911	F	10-14	K	K026
K0262912	M	30-34	K	K026
K0262913	F	NA	K	K026
K0262915	M	NA	K	K026
K0262917	F	NA	K	K026
K0262919	F	NA	K	K026
K0262920	M	5-9	K	K026
K0262921	F	NA	K	K026
K0262922	M	10-14	K	K026
K0262923	F	5-9	K	K026
K0262924	M	NA	K	K026
K0262925	M	10-14	K	K026
K0262926	F	5-9	K	K026
K0262927	F	NA	K	K026
K0262928	M	NA	K	K026
K0262929	F	NA	K	K026
K0262930	M	NA	K	K026
K0262931	F	NA	K	K026
K0262932	M	40-44	K	K026
K0262933	M	45-49	K	K026
K0262934	M	20-24	K	K026
K0262935	M	70-74	K	K026
K0262936	M	10-14	K	K026
K0262937	F	20-24	K	K026
K0262938	F	0-4	K	K026
K0262939	F	5-9	K	K026
K0262940	F	10-14	K	K026
K0262941	F	0-4	K	K026
K0262942	M	10-14	K	K026
K0262943	F	35-39	K	K026
K0262944	F	15-19	K	K026
K0262945	M	5-9	K	K026
K0262946	F	0-4	K	K026
K0262947	F	10-14	K	K026
K0262948	M	0-4	K	K026
K0263001	F	40-44	K	K026
K0263003	F	10-14	K	K026
K0263004	M	0-4	K	K026
K0263005	M	5-9	K	K026
K0263006	M	60-64	K	K026
K0263007	F	45-49	K	K026
K0263008	F	45-49	K	K026
K0263009	M	50-54	K	K026
K0263011	M	10-14	K	K026
K0263101	F	5-9	K	K026
K0263102	F	55-59	K	K026
K0263103	M	0-4	K	K026
K0263105	M	30-34	K	K026
K0263106	M	25-29	K	K026
K0263107	F	20-24	K	K026
K0263109	F	15-19	K	K026
K0263111	M	5-9	K	K026
K0273201	F	40-44	K	K027
K0273202	M	5-9	K	K027
K0273203	M	10-14	K	K027
K0273204	F	10-14	K	K027
K0273205	F	20-24	K	K027
K0273206	M	NA	K	K027
K0273207	M	15-19	K	K027
K0273208	F	20-24	K	K027
K0273209	F	20-24	K	K027
K0273210	M	25-29	K	K027
K0273211	M	10-14	K	K027
K0273213	M	20-24	K	K027
K0273214	F	25-29	K	K027
K0273215	F	0-4	K	K027
K0273216	F	5-9	K	K027
K0281410	F	20-24	K	K028
K0283302	F	65-69	K	K028
K0283303	F	50-54	K	K028
K0283304	M	NA	K	K028
K0283305	F	20-24	K	K028
K0283307	F	0-4	K	K028
K0283308	NA	NA	K	K028
K0283310	F	5-9	K	K028
K0283311	F	15-19	K	K028
K0283312	F	0-4	K	K028
K0283313	F	15-19	K	K028
K0283314	F	5-9	K	K028
K0283315	F	10-14	K	K028
K0283316	M	5-9	K	K028
K0283317	F	35-39	K	K028
K0283318	F	20-24	K	K028
K0283319	M	NA	K	K028
K0283320	M	5-9	K	K028
K0283321	F	NA	K	K028
K0283322	M	20-24	K	K028
K0283323	M	NA	K	K028
K0283324	F	5-9	K	K028
K0283325	M	30-34	K	K028
K0283330	M	45-49	K	K028
K0283333	M	15-19	K	K028
K0283334	F	25-29	K	K028
K0283335	M	5-9	K	K028
K0283336	F	5-9	K	K028
K0283401	F	55-59	K	K028
K0283402	F	0-4	K	K028
K0283403	F	20-24	K	K028
K0283404	F	20-24	K	K028
K0283406	M	NA	K	K028
K0283409	M	0-4	K	K028
K0292939	NA	NA	K	K029
K0303501	M	70-74	K	K030
K0303502	F	35-39	K	K030
K0303503	F	5-9	K	K030
K0303504	M	5-9	K	K030
K0303505	M	15-19	K	K030
K0303506	NA	NA	K	K030
K0303507	F	40-44	K	K030
K0303508	F	5-9	K	K030
K0303509	M	30-34	K	K030
K0313601	F	45-49	K	K031
K0313602	M	10-14	K	K031
K0313603	F	10-14	K	K031
K0313604	F	10-14	K	K031
K0313605	M	5-9	K	K031
K0313606	F	10-14	K	K031
K0313607	M	5-9	K	K031
K0313608	F	35-39	K	K031
K0313609	F	40-44	K	K031
K0313610	M	5-9	K	K031
K0313612	F	30-34	K	K031
K0313613	M	15-19	K	K031
K0313614	M	50-54	K	K031
K0313616	M	0-4	K	K031
K0313617	F	20-24	K	K031
K0313618	M	0-4	K	K031
K0323701	F	60-64	K	K032
K0323702	F	45-49	K	K032
K0323703	F	35-39	K	K032
K0323704	F	10-14	K	K032
K0323705	F	25-29	K	K032
K0323706	F	10-14	K	K032
K0323707	F	5-9	K	K032
K0323708	F	35-39	K	K032
K0323709	F	15-19	K	K032
K0323710	F	10-14	K	K032
K0323713	F	25-29	K	K032
K0323714	F	25-29	K	K032
K0323715	F	5-9	K	K032
K0323717	M	NA	K	K032
K0323718	M	0-4	K	K032
K0323719	F	25-29	K	K032
K0323723	M	35-39	K	K032
K0323725	M	25-29	K	K032
K0323729	M	0-4	K	K032
K0323730	M	0-4	K	K032
K0323731	F	5-9	K	K032
K0323732	M	10-14	K	K032
K0323801	F	20-24	K	K032
K0323809	F	55-59	K	K032
K0323810	NA	NA	K	K032
K0323811	F	5-9	K	K032
K0323812	M	0-4	K	K032
K0333901	M	15-19	K	K033
K0333902	M	10-14	K	K033
K0333905	F	5-9	K	K033
K0333906	F	5-9	K	K033
K0333907	F	15-19	K	K033
K0333908	M	0-4	K	K033
K0333909	F	0-4	K	K033
K0333910	F	35-39	K	K033
K0333911	F	5-9	K	K033
K0333912	F	5-9	K	K033
K0333913	M	10-14	K	K033
K0333914	M	15-19	K	K033
K0344001	F	0-4	K	K034
K0344002	M	5-9	K	K034
K0344003	F	5-9	K	K034
K0344004	F	5-9	K	K034
K0344006	F	40-44	K	K034
K0344007	F	45-49	K	K034
K0344008	M	10-14	K	K034
K0344009	F	15-19	K	K034
K0344010	M	10-14	K	K034
K0344011	F	30-34	K	K034
K0344013	F	5-9	K	K034
K0344014	M	5-9	K	K034
K0344015	M	0-4	K	K034
K0344016	F	15-19	K	K034
K0344017	F	10-14	K	K034
K0344018	M	5-9	K	K034
K0344019	F	10-14	K	K034
K0344020	M	0-4	K	K034
K0344021	F	0-4	K	K034
K0344022	F	10-14	K	K034
K0344023	M	0-4	K	K034
K0344024	F	15-19	K	K034
K0344025	F	NA	K	K034
K0344026	F	65-69	K	K034
K0344027	M	10-14	K	K034
K0344028	M	5-9	K	K034
K0344030	M	10-14	K	K034
K0344031	F	20-24	K	K034
K0344032	F	30-34	K	K034
K0344033	F	10-14	K	K034
K0344034	M	40-44	K	K034
K0344035	F	60-64	K	K034
K0344036	F	5-9	K	K034
K0344037	M	0-4	K	K034
K0344102	M	0-4	K	K034
K0344103	F	20-24	K	K034
K0344104	M	5-9	K	K034
K0344105	F	25-29	K	K034
K0344106	F	5-9	K	K034
K0344107	F	5-9	K	K034
K0344108	F	40-44	K	K034
K0344109	M	5-9	K	K034
K0344110	M	20-24	K	K034
K0344111	M	0-4	K	K034
K0344112	F	5-9	K	K034
K0344113	F	30-34	K	K034
K0344114	F	20-24	K	K034
K0344115	F	NA	K	K034
K0344116	F	5-9	K	K034
K0344117	M	NA	K	K034
K0354201	M	20-24	K	K035
K0364301	F	40-44	K	K036
K0364302	F	NA	K	K036
K0364303	M	5-9	K	K036
K0364304	F	20-24	K	K036
K0364305	F	NA	K	K036
K0364306	F	40-44	K	K036
K0364307	F	50-54	K	K036
K0364308	M	5-9	K	K036
K0364309	M	10-14	K	K036
K0364310	M	15-19	K	K036
K0364311	M	10-14	K	K036
K0364312	M	10-14	K	K036
K0364313	M	5-9	K	K036
K0364314	M	NA	K	K036
K0364315	M	5-9	K	K036
K0364316	M	15-19	K	K036
K0364317	M	0-4	K	K036
K0364318	M	NA	K	K036
K0364319	F	NA	K	K036
K0364320	F	30-34	K	K036
K0364321	F	25-29	K	K036
K0364323	F	NA	K	K036
K0364324	F	30-34	K	K036
K0364325	M	NA	K	K036
K0364326	F	0-4	K	K036
K0364328	F	30-34	K	K036
K0364329	M	40-44	K	K036
K0364330	M	30-34	K	K036
K0364333	M	NA	K	K036
K0364334	M	0-4	K	K036
K0364335	F	30-34	K	K036
K0364336	F	10-14	K	K036
K0364337	F	0-4	K	K036
K0364339	F	20-24	K	K036
K0364340	M	30-34	K	K036
K0374402	M	5-9	K	K037
K0374403	F	30-34	K	K037
K0374404	F	20-24	K	K037
K0374405	M	45-49	K	K037
K0374406	F	5-9	K	K037
K0374407	F	30-34	K	K037
K0374408	M	25-29	K	K037
K0374412	M	5-9	K	K037
K0374413	NA	NA	K	K037
K0374501	M	50-54	K	K037
K0374502	F	40-44	K	K037
K0374503	F	15-19	K	K037
K0374504	F	20-24	K	K037
K0374505	M	0-4	K	K037
K0374506	M	10-14	K	K037
K0374507	M	10-14	K	K037
K0374508	M	5-9	K	K037
K0374509	F	0-4	K	K037
K0374510	F	40-44	K	K037
K0374511	M	5-9	K	K037
K0374512	M	10-14	K	K037
K0374513	F	15-19	K	K037
K0374514	M	20-24	K	K037
K0374515	M	0-4	K	K037
K0384601	M	5-9	K	K038
K0384602	M	5-9	K	K038
K0384603	F	5-9	K	K038
K0384604	F	25-29	K	K038
K0384605	M	15-19	K	K038
K0384608	F	5-9	K	K038
K0384609	M	0-4	K	K038
K0384611	M	10-14	K	K038
K0394903	F	15-19	K	K039
K0394904	F	5-9	K	K039
K0394905	M	0-4	K	K039
K0394906	M	5-9	K	K039
K0394907	F	10-14	K	K039
K0394908	F	50-54	K	K039
K0394909	M	15-19	K	K039
K0394910	M	NA	K	K039
K0394911	M	10-14	K	K039
K0394912	F	55-59	K	K039
K0394913	M	10-14	K	K039
K0394914	M	5-9	K	K039
K0394915	M	5-9	K	K039
K0394916	F	20-24	K	K039
K0394917	F	50-54	K	K039
K0394919	M	5-9	K	K039
K0394920	F	NA	K	K039
K0394921	F	30-34	K	K039
K0394922	F	15-19	K	K039
K0394923	F	0-4	K	K039
K0394924	F	25-29	K	K039
K0394925	F	15-19	K	K039
K0394928	M	0-4	K	K039
K0394929	F	25-29	K	K039
K0394931	F	0-4	K	K039
K0394932	F	20-24	K	K039
K0394934	M	35-39	K	K039
K0394935	M	5-9	K	K039
K0394936	F	NA	K	K039
K0394938	F	30-34	K	K039
K0405002	M	0-4	K	K040
K0405003	F	35-39	K	K040
K0405005	M	10-14	K	K040
K0405006	F	10-14	K	K040
K0405007	M	0-4	K	K040
K0405008	F	25-29	K	K040
K0405009	M	0-4	K	K040
K0405010	M	20-24	K	K040
K0405011	M	40-44	K	K040
K0405012	NA	NA	K	K040
K0405013	M	NA	K	K040
K0405015	F	0-4	K	K040
K0405016	F	20-24	K	K040
K0405017	M	0-4	K	K040
K0415101	M	75-79	K	K041
K0415102	F	50-54	K	K041
K0415103	M	5-9	K	K041
K0415104	M	0-4	K	K041
K0415105	F	15-19	K	K041
K0415106	F	20-24	K	K041
K0415107	M	15-19	K	K041
K0415108	F	20-24	K	K041
K0415109	M	0-4	K	K041
K0415110	F	20-24	K	K041
K0425203	M	0-4	K	K042
K0425204	M	0-4	K	K042
K0425205	M	5-9	K	K042
K0425206	F	10-14	K	K042
K0425207	F	15-19	K	K042
K0425208	F	30-34	K	K042
K0425209	M	10-14	K	K042
K0425210	M	0-4	K	K042
K0425211	M	0-4	K	K042
K0425212	F	25-29	K	K042
K0425213	M	0-4	K	K042
K0425214	F	10-14	K	K042
K0425216	M	55-59	K	K042
K0425217	NA	NA	K	K042
K0425218	F	5-9	K	K042
K0425219	M	10-14	K	K042
K0435304	F	20-24	K	K043
K0435306	NA	NA	K	K043
N0010101	M	65-69	N	N001
N0010102	M	0-4	N	N001
N0010103	M	0-4	N	N001
N0010104	F	55-59	N	N001
N0010105	F	20-24	N	N001
N0010106	M	10-14	N	N001
N0010107	F	10-14	N	N001
N0010109	M	20-24	N	N001
N0010110	M	20-24	N	N001
N0010111	F	5-9	N	N001
N0020201	M	50-54	N	N002
N0020202	F	40-44	N	N002
N0020203	F	10-14	N	N002
N0020204	M	5-9	N	N002
N0020205	F	10-14	N	N002
N0020206	F	15-19	N	N002
N0020207	M	15-19	N	N002
N0020208	M	5-9	N	N002
N0020210	F	5-9	N	N002
N0020211	F	20-24	N	N002
N0020212	M	15-19	N	N002
N0020213	F	15-19	N	N002
N0030301	M	55-59	N	N003
N0030302	F	30-34	N	N003
N0030303	F	5-9	N	N003
N0030304	M	15-19	N	N003
N0030305	F	10-14	N	N003
N0030306	F	0-4	N	N003
N0030307	M	25-29	N	N003
N0030308	M	25-29	N	N003
N0030309	F	30-34	N	N003
N0030310	F	10-14	N	N003
N0040402	F	30-34	N	N004
N0040405	F	5-9	N	N004
N0040406	M	15-19	N	N004
N0040407	M	5-9	N	N004
N0050501	F	80-84	N	N005
N0050502	F	40-44	N	N005
N0050503	M	15-19	N	N005
N0050504	M	10-14	N	N005
N0050505	M	5-9	N	N005
N0050506	F	15-19	N	N005
N0050507	F	35-39	N	N005
N0050508	F	10-14	N	N005
N0050509	M	5-9	N	N005
N0050510	F	5-9	N	N005
N0050511	F	15-19	N	N005
N0050512	M	10-14	N	N005
N0050513	F	20-24	N	N005
N0050514	F	NA	N	N005
N0050515	M	10-14	N	N005
N0050516	F	5-9	N	N005
N0050517	M	20-24	N	N005
N0060601	M	70-74	N	N006
N0060602	F	65-69	N	N006
N0060603	F	25-29	N	N006
N0060604	F	0-4	N	N006
N0070701	F	50-54	N	N007
N0070702	F	10-14	N	N007
N0080803	F	30-34	N	N008
N0080804	F	5-9	N	N008
N0080805	F	10-14	N	N008
N0090903	F	20-24	N	N009
N0090906	M	5-9	N	N009
N0090907	F	5-9	N	N009
N0090910	F	20-24	N	N009
N0090915	F	30-34	N	N009
N0090916	F	10-14	N	N009
N0090922	F	30-34	N	N009
N0090923	F	0-4	N	N009
N0101002	F	25-29	N	N010
N0101003	F	0-4	N	N010
N0101004	M	15-19	N	N010
N0101005	F	10-14	N	N010
N0101006	F	25-29	N	N010
N0101007	M	40-44	N	N010
N0101009	F	5-9	N	N010
N0101010	F	30-34	N	N010
N0101012	M	5-9	N	N010
N0101013	F	5-9	N	N010
N0101014	F	5-9	N	N010
N0101015	M	0-4	N	N010
N0111102	F	0-4	N	N011
N0111103	F	30-34	N	N011
N0111104	F	5-9	N	N011
N0111105	F	0-4	N	N011
N0111107	M	0-4	N	N011
N0111108	F	60-64	N	N011
N0111109	F	30-34	N	N011
N0111110	F	20-24	N	N011
N0111111	F	15-19	N	N011
N0111112	F	25-29	N	N011
N0111114	F	20-24	N	N011
N0111115	F	10-14	N	N011
N0111116	M	10-14	N	N011
N0121201	M	55-59	N	N012
N0121202	F	30-34	N	N012
N0121203	F	10-14	N	N012
N0121204	M	5-9	N	N012
N0121205	M	5-9	N	N012
N0121206	M	5-9	N	N012
N0121207	M	35-39	N	N012
N0121208	F	20-24	N	N012
N0121209	F	5-9	N	N012
N0121210	F	10-14	N	N012
N0121211	F	20-24	N	N012
N0121212	M	5-9	N	N012
N0121213	M	0-4	N	N012
N0121215	M	5-9	N	N012
N0131302	F	50-54	N	N013
N0131303	M	15-19	N	N013
N0131309	M	25-29	N	N013
N0131310	M	65-69	N	N013
N0131311	F	35-39	N	N013
N0131312	M	15-19	N	N013
N0131313	M	NA	N	N013
N0131314	M	5-9	N	N013
N0131315	F	35-39	N	N013
N0131316	M	0-4	N	N013
N0131317	M	60-64	N	N013
N0131318	F	20-24	N	N013
N0131319	F	5-9	N	N013
N0131320	F	0-4	N	N013
N0131321	F	5-9	N	N013
N0131322	M	50-54	N	N013
N0131323	F	10-14	N	N013
N0131324	M	25-29	N	N013
N0131325	F	10-14	N	N013
N0131326	F	5-9	N	N013
N0131327	F	10-14	N	N013
N0131329	M	5-9	N	N013
N0141403	M	25-29	N	N014
N0141405	F	5-9	N	N014
N0141406	F	45-49	N	N014
N0141408	F	5-9	N	N014
N0141409	F	0-4	N	N014
N0141410	F	10-14	N	N014
N0141411	M	0-4	N	N014
N0141412	F	10-14	N	N014
N0141413	F	5-9	N	N014
N0141414	M	35-39	N	N014
N0141415	F	25-29	N	N014
P0010101	M	75-79	P	P001
P0010102	F	70-74	P	P001
P0010103	M	40-44	P	P001
P0010104	F	35-39	P	P001
P0010105	M	35-39	P	P001
P0010106	F	60-64	P	P001
P0010108	M	25-29	P	P001
P0010109	F	30-34	P	P001
P0010110	F	15-19	P	P001
P0010111	F	10-14	P	P001
P0010112	M	5-9	P	P001
P0010113	F	0-4	P	P001
P0010114	F	30-34	P	P001
P0010115	F	15-19	P	P001
P0010116	M	5-9	P	P001
P0010117	M	0-4	P	P001
P0010118	F	15-19	P	P001
P0010119	F	5-9	P	P001
P0010120	M	5-9	P	P001
P0010121	M	10-14	P	P001
P0010122	F	40-44	P	P001
P0010123	M	0-4	P	P001
P0010124	F	5-9	P	P001
P0010125	M	5-9	P	P001
P0010126	F	15-19	P	P001
P0010127	F	20-24	P	P001
P0010128	F	0-4	P	P001
P0010129	M	5-9	P	P001
P0010130	M	5-9	P	P001
P0010131	M	35-39	P	P001
P0010132	F	25-29	P	P001
P0010133	F	30-34	P	P001
P0010134	F	5-9	P	P001
P0010135	M	10-14	P	P001
P0010136	F	10-14	P	P001
P0010137	F	5-9	P	P001
P0010138	M	5-9	P	P001
P0020202	F	55-59	P	P002
P0020203	F	40-44	P	P002
P0020204	F	5-9	P	P002
P0020205	M	NA	P	P002
P0020206	M	10-14	P	P002
P0020207	F	15-19	P	P002
P0020208	F	15-19	P	P002
P0020209	F	10-14	P	P002
P0020210	M	5-9	P	P002
P0020211	F	5-9	P	P002
P0020212	M	5-9	P	P002
P0020213	M	10-14	P	P002
P0020214	M	15-19	P	P002
P0020215	M	10-14	P	P002
P0030302	F	55-59	P	P003
P0030303	M	35-39	P	P003
P0030304	F	25-29	P	P003
P0030305	M	5-9	P	P003
P0030306	F	10-14	P	P003
P0040401	M	55-59	P	P004
P0040402	F	40-44	P	P004
P0040404	M	5-9	P	P004
P0040406	F	NA	P	P004
P0040407	F	10-14	P	P004
P0040408	F	5-9	P	P004
P0050501	M	35-39	P	P005
P0050502	F	60-64	P	P005
P0050503	F	30-34	P	P005
P0050504	F	35-39	P	P005
P0050505	F	5-9	P	P005
P0050506	F	0-4	P	P005
P0050508	M	10-14	P	P005
P0050509	M	5-9	P	P005
P0050510	F	25-29	P	P005
P0050511	M	5-9	P	P005
P0050512	M	5-9	P	P005
P0050513	M	25-29	P	P005
P0050514	M	35-39	P	P005
P0050515	M	5-9	P	P005
P0050516	M	NA	P	P005
P0050517	F	0-4	P	P005
P0050518	M	5-9	P	P005
P0050519	F	25-29	P	P005
P0050520	F	15-19	P	P005
P0050521	F	15-19	P	P005
P0060601	M	40-44	P	P006
P0060602	F	45-49	P	P006
P0060603	M	0-4	P	P006
P0060604	M	10-14	P	P006
P0060605	F	5-9	P	P006
P0060606	M	15-19	P	P006
P0060607	F	5-9	P	P006
P0060608	F	65-69	P	P006
P0060609	M	45-49	P	P006
P0060610	F	45-49	P	P006
P0060611	F	5-9	P	P006
P0060612	M	0-4	P	P006
P0060614	F	30-34	P	P006
P0060615	F	40-44	P	P006
P0060616	F	15-19	P	P006
P0060617	M	5-9	P	P006
P0060618	M	5-9	P	P006
P0060619	F	5-9	P	P006
P0060620	M	10-14	P	P006
P0060621	M	NA	P	P006
P0060622	M	NA	P	P006
P0060623	F	15-19	P	P006
P0060624	M	10-14	P	P006
P0060625	M	10-14	P	P006
P0060626	M	5-9	P	P006
P0060627	F	0-4	P	P006
P0060628	M	40-44	P	P006
P0070701	M	50-54	P	P007
P0070702	F	25-29	P	P007
P0070703	F	40-44	P	P007
P0070704	F	5-9	P	P007
P0070705	M	15-19	P	P007
P0070706	M	0-4	P	P007
P0070707	F	25-29	P	P007
P0070708	F	5-9	P	P007
P0070709	F	0-4	P	P007
P0070710	M	10-14	P	P007
P0070711	M	5-9	P	P007
P0070713	F	25-29	P	P007
P0070714	M	0-4	P	P007
P0070715	F	5-9	P	P007
P0070716	M	45-49	P	P007
P0070717	F	15-19	P	P007
P0070718	F	5-9	P	P007
P0070719	M	20-24	P	P007
P0070720	F	10-14	P	P007
P0070721	F	0-4	P	P007
P0070722	F	25-29	P	P007
P0070723	M	5-9	P	P007
P0070724	F	0-4	P	P007
P0070725	M	30-34	P	P007
P0080801	M	80-84	P	P008
P0080802	F	60-64	P	P008
P0080803	F	40-44	P	P008
P0080804	M	35-39	P	P008
P0080805	F	25-29	P	P008
P0080806	F	0-4	P	P008
P0080807	F	5-9	P	P008
P0080808	M	10-14	P	P008
P0080809	M	45-49	P	P008
P0080810	F	35-39	P	P008
P0080811	F	30-34	P	P008
P0080812	M	5-9	P	P008
P0080813	F	10-14	P	P008
P0080814	M	10-14	P	P008
P0080815	F	5-9	P	P008
P0080816	F	0-4	P	P008
P0080817	M	15-19	P	P008
P0080818	F	5-9	P	P008
P0080821	F	35-39	P	P008
P0080822	M	5-9	P	P008
P0080823	M	5-9	P	P008
P0080824	M	10-14	P	P008
P0080825	M	60-64	P	P008
P0080826	M	50-54	P	P008
P0080827	F	35-39	P	P008
P0080828	M	0-4	P	P008
P0080829	F	0-4	P	P008
P0080830	F	15-19	P	P008
P0080831	M	5-9	P	P008
P0080832	M	10-14	P	P008
P0080833	F	35-39	P	P008
P0080834	M	40-44	P	P008
P0080835	F	0-4	P	P008
P0080836	F	5-9	P	P008
P0080837	M	5-9	P	P008
P0080838	F	30-34	P	P008
P0080840	F	10-14	P	P008
P0080841	M	15-19	P	P008
P0080842	M	10-14	P	P008
P0080843	M	10-14	P	P008
P0080844	M	55-59	P	P008
P0080845	M	10-14	P	P008
P0080846	F	10-14	P	P008
P0080847	F	NA	P	P008
P0080848	M	0-4	P	P008
P0080849	M	40-44	P	P008
P0080850	F	25-29	P	P008
P0080851	F	5-9	P	P008
P0080853	F	25-29	P	P008
P0080854	F	20-24	P	P008
P0080855	M	0-4	P	P008
P0080856	M	30-34	P	P008
P0080857	F	35-39	P	P008
P0080858	F	5-9	P	P008
P0080860	M	10-14	P	P008
P0080861	M	5-9	P	P008
P0080862	F	15-19	P	P008
P0080863	F	10-14	P	P008
P0080864	M	NA	P	P008
P0080865	F	5-9	P	P008
P0080866	M	40-44	P	P008
P0080867	F	0-4	P	P008
P0080869	M	15-19	P	P008
P0080871	F	35-39	P	P008
P0080872	F	35-39	P	P008
P0080873	F	5-9	P	P008
P0080874	F	10-14	P	P008
P0080875	M	60-64	P	P008
P0080876	F	0-4	P	P008
P0080877	M	NA	P	P008
P0080878	F	25-29	P	P008
P0080879	F	5-9	P	P008
P0080880	F	40-44	P	P008
P0080881	M	85-89	P	P008
P0080882	M	5-9	P	P008
P0090901	M	55-59	P	P009
P0090902	F	10-14	P	P009
P0090903	F	15-19	P	P009
P0090904	M	10-14	P	P009
P0090905	F	10-14	P	P009
P0090906	F	15-19	P	P009
P0090907	F	75-79	P	P009
P0090908	M	25-29	P	P009
P0101001	M	55-59	P	P010
P0101002	F	10-14	P	P010
P0101003	M	0-4	P	P010
P0101004	M	10-14	P	P010
P0101005	M	5-9	P	P010
P0101007	F	10-14	P	P010
P0101008	F	45-49	P	P010
P0101009	F	10-14	P	P010
P0101010	M	35-39	P	P010
P0101011	F	30-34	P	P010
P0111101	F	30-34	P	P011
P0111102	M	5-9	P	P011
P0111103	F	5-9	P	P011
P0111104	M	15-19	P	P011
P0111105	M	15-19	P	P011
P0111106	F	25-29	P	P011
P0111107	F	25-29	P	P011
P0121201	M	50-54	P	P012
P0121202	F	35-39	P	P012
P0121203	M	10-14	P	P012
P0121204	M	10-14	P	P012
P0121206	M	10-14	P	P012
P0121207	F	5-9	P	P012
P0121208	F	40-44	P	P012
P0121210	M	5-9	P	P012
P0121211	F	15-19	P	P012
P0121212	M	15-19	P	P012
P0121213	F	25-29	P	P012
P0121214	F	10-14	P	P012
P0121215	M	0-4	P	P012
P0121216	M	45-49	P	P012
P0121217	M	5-9	P	P012
P0121218	F	15-19	P	P012
P0121219	F	10-14	P	P012
P0121220	F	10-14	P	P012
P0121221	F	5-9	P	P012
P0131301	F	20-24	P	P013
P0131302	M	5-9	P	P013
P0131303	F	15-19	P	P013
P0131304	F	20-24	P	P013
P0131305	F	NA	P	P013
