# Supplementary material for: Household clustering and seasonal genetic variation of Plasmodium falciparum at the community-level in The Gambia
Source: eLife. 2025 May 27;13:RP103047. doi: 10.7554/eLife.103047 (PMC12113269; doi:10.7554/eLife.103047)
Supplement: Supplementary file 2. [file elife-103047-supp2.xlsx]

## Sheet: TS2 - Sampling
Sample_ID	Subject_ID	December 2016 Cohort member	Sampling date (YYYY-MM)	Collection type	falciparum-malaria infection status	Treatment date (YYYY-MM)
J0010102_1412	J0010102	FALSE	2014-12	Fingerprick	NEG	NA
J0010102_1512	J0010102	FALSE	2015-12	Fingerprick	NEG	NA
J0010102_1603	J0010102	FALSE	2016-03	Fingerprick	NEG	NA
J0010102_1610	J0010102	FALSE	2016-10	Fingerprick	POS	NA
J0010102_1611	J0010102	FALSE	2016-11	Fingerprick	NEG	2016-11
J0010102_1612	J0010102	FALSE	2016-12	Fingerprick	NEG	NA
J0010103_1412	J0010103	FALSE	2014-12	Fingerprick	POS	NA
J0010103_1504	J0010103	FALSE	2015-04	Fingerprick	NEG	NA
J0010103_1511	J0010103	FALSE	2015-11	Fingerprick	NEG	NA
J0010103_1603	J0010103	FALSE	2016-03	Fingerprick	NEG	NA
J0010103_1607	J0010103	FALSE	2016-07	Fingerprick	NEG	NA
J0010103_1610	J0010103	FALSE	2016-10	Fingerprick	NEG	NA
J0010103_1611	J0010103	FALSE	2016-11	Fingerprick	NEG	NA
J0010103_1612	J0010103	FALSE	2016-12	Fingerprick	NEG	NA
J0010104_1506	J0010104	FALSE	2015-06	Fingerprick	NEG	NA
J0010104_1511	J0010104	FALSE	2015-11	Fingerprick	NEG	NA
J0010104_1512	J0010104	FALSE	2015-12	Fingerprick	NEG	NA
J0010104_1603	J0010104	FALSE	2016-03	Fingerprick	NEG	NA
J0010104_1607	J0010104	FALSE	2016-07	Fingerprick	NEG	NA
J0010104_1610	J0010104	FALSE	2016-10	Fingerprick	NEG	NA
J0010104_1611	J0010104	FALSE	2016-11	Fingerprick	NEG	NA
J0010104_1612	J0010104	FALSE	2016-12	Fingerprick	NEG	NA
J0010105_1412	J0010105	FALSE	2014-12	Fingerprick	NEG	NA
J0010105_1511	J0010105	FALSE	2015-11	Fingerprick	NEG	NA
J0010105_1512	J0010105	FALSE	2015-12	Fingerprick	NEG	NA
J0010105_1603	J0010105	FALSE	2016-03	Fingerprick	NEG	NA
J0010105_1611	J0010105	FALSE	2016-11	Fingerprick	NEG	NA
J0010105_1612	J0010105	FALSE	2016-12	Fingerprick	NEG	NA
J0010106_1412	J0010106	FALSE	2014-12	Fingerprick	NEG	NA
J0010106_1504	J0010106	FALSE	2015-04	Fingerprick	NEG	NA
J0010106_1511	J0010106	FALSE	2015-11	Fingerprick	NEG	NA
J0010106_1603	J0010106	FALSE	2016-03	Fingerprick	NEG	NA
J0010106_1610	J0010106	FALSE	2016-10	Fingerprick	NEG	NA
J0010106_1611	J0010106	FALSE	2016-11	Fingerprick	NEG	NA
J0010106_1612	J0010106	FALSE	2016-12	Fingerprick	NEG	NA
J0010107_1506	J0010107	FALSE	2015-06	Fingerprick	POS	NA
J0010107_1511	J0010107	FALSE	2015-11	Fingerprick	POS	NA
J0010107_1512	J0010107	FALSE	2015-12	Fingerprick	NEG	NA
J0010107_1603	J0010107	FALSE	2016-03	Fingerprick	NEG	NA
J0010107_1607	J0010107	FALSE	2016-07	Fingerprick	NEG	NA
J0010108_1412	J0010108	FALSE	2014-12	Fingerprick	NEG	NA
J0010108_1511	J0010108	FALSE	2015-11	Fingerprick	NEG	NA
J0010108_1512	J0010108	FALSE	2015-12	Fingerprick	NEG	NA
J0010108_1603	J0010108	FALSE	2016-03	Fingerprick	NEG	NA
J0010108_1607	J0010108	FALSE	2016-07	Fingerprick	NEG	NA
J0010108_1610	J0010108	FALSE	2016-10	Fingerprick	NEG	NA
J0010108_1611	J0010108	FALSE	2016-11	Fingerprick	NEG	NA
J0010108_1612	J0010108	FALSE	2016-12	Fingerprick	NEG	NA
J0010109_1412	J0010109	FALSE	2014-12	Fingerprick	NEG	NA
J0010109_1511	J0010109	FALSE	2015-11	Fingerprick	NEG	NA
J0010109_1512	J0010109	FALSE	2015-12	Fingerprick	NEG	NA
J0010109_1603	J0010109	FALSE	2016-03	Fingerprick	NEG	NA
J0010109_1607	J0010109	FALSE	2016-07	Fingerprick	NEG	NA
J0010110_1504	J0010110	FALSE	2015-04	Fingerprick	NEG	NA
J0010112_1412	J0010112	FALSE	2014-12	Fingerprick	NEG	NA
J0010112_1511	J0010112	FALSE	2015-11	Fingerprick	POS	NA
J0010112_1603	J0010112	FALSE	2016-03	Fingerprick	NEG	NA
J0010112_1605	J0010112	FALSE	2016-05	Fingerprick	NEG	NA
J0010112_1610	J0010112	FALSE	2016-10	Fingerprick	NEG	NA
J0010112_1612	J0010112	FALSE	2016-12	Fingerprick	NEG	NA
J0010113_1412	J0010113	FALSE	2014-12	Fingerprick	NEG	NA
J0010113_1512	J0010113	FALSE	2015-12	Fingerprick	NEG	NA
J0010113_1603	J0010113	FALSE	2016-03	Fingerprick	NEG	NA
J0010113_1607	J0010113	FALSE	2016-07	Fingerprick	NEG	NA
J0010113_1610	J0010113	FALSE	2016-10	Fingerprick	NEG	NA
J0010113_1611	J0010113	FALSE	2016-11	Fingerprick	NEG	NA
J0010113_1612	J0010113	FALSE	2016-12	Fingerprick	NEG	NA
J0010114_1412	J0010114	FALSE	2014-12	Fingerprick	NEG	NA
J0010114_1511	J0010114	FALSE	2015-11	Fingerprick	NEG	NA
J0010114_1512	J0010114	FALSE	2015-12	Fingerprick	NEG	NA
J0010114_1603	J0010114	FALSE	2016-03	Fingerprick	NEG	NA
J0010114_1607	J0010114	FALSE	2016-07	Fingerprick	NEG	NA
J0010114_1611	J0010114	FALSE	2016-11	Fingerprick	NEG	NA
J0010114_1612	J0010114	FALSE	2016-12	Fingerprick	NEG	NA
J0010115_1412	J0010115	FALSE	2014-12	Fingerprick	NEG	NA
J0010115_1504	J0010115	FALSE	2015-04	Fingerprick	NEG	NA
J0010115_1511	J0010115	FALSE	2015-11	Fingerprick	NEG	NA
J0010115_1603	J0010115	FALSE	2016-03	Fingerprick	NEG	NA
J0010115_1607	J0010115	FALSE	2016-07	Fingerprick	NEG	NA
J0010115_1611	J0010115	FALSE	2016-11	Fingerprick	NEG	NA
J0010115_1612	J0010115	FALSE	2016-12	Fingerprick	NEG	NA
J0010116_1511	J0010116	FALSE	2015-11	Fingerprick	NEG	NA
J0010116_1512	J0010116	FALSE	2015-12	Fingerprick	NEG	NA
J0010117_1504	J0010117	FALSE	2015-04	Fingerprick	NEG	NA
J0010117_1511	J0010117	FALSE	2015-11	Fingerprick	NEG	NA
J0010117_1512	J0010117	FALSE	2015-12	Fingerprick	NEG	NA
J0010117_1603	J0010117	FALSE	2016-03	Fingerprick	NEG	NA
J0010117_1607	J0010117	FALSE	2016-07	Fingerprick	NEG	NA
J0010117_1611	J0010117	FALSE	2016-11	Venous blood	POS	NA
J0010117_1612	J0010117	FALSE	2016-12	Fingerprick	NEG	NA
J0010118_1506	J0010118	FALSE	2015-06	Fingerprick	POS	NA
J0010118_1511	J0010118	FALSE	2015-11	Fingerprick	NEG	NA
J0010118_1512	J0010118	FALSE	2015-12	Fingerprick	NEG	NA
J0010118_1603	J0010118	FALSE	2016-03	Fingerprick	NEG	NA
J0010118_1607	J0010118	FALSE	2016-07	Fingerprick	NEG	NA
J0010118_1610	J0010118	FALSE	2016-10	Fingerprick	NEG	NA
J0010118_1611	J0010118	FALSE	2016-11	Fingerprick	NEG	NA
J0010118_1612	J0010118	FALSE	2016-12	Fingerprick	NEG	NA
J0010119_1506	J0010119	FALSE	2015-06	Fingerprick	NEG	NA
J0010119_1512	J0010119	FALSE	2015-12	Fingerprick	NEG	NA
J0010119_1603	J0010119	FALSE	2016-03	Fingerprick	NEG	NA
J0010119_1607	J0010119	FALSE	2016-07	Fingerprick	NEG	NA
J0010119_1611	J0010119	FALSE	2016-11	Fingerprick	NEG	NA
J0010119_1612	J0010119	FALSE	2016-12	Fingerprick	NEG	NA
J0010120_1412	J0010120	FALSE	2014-12	Fingerprick	POS	NA
J0010120_1511	J0010120	FALSE	2015-11	Fingerprick	NEG	NA
J0010120_1607	J0010120	FALSE	2016-07	Fingerprick	NEG	NA
J0010120_1610	J0010120	FALSE	2016-10	Fingerprick	NEG	NA
J0010120_1611	J0010120	FALSE	2016-11	Fingerprick	POS	2016-11
J0010120_1612	J0010120	FALSE	2016-12	Fingerprick	NEG	NA
J0010121_1506	J0010121	FALSE	2015-06	Fingerprick	NEG	NA
J0010121_1511	J0010121	FALSE	2015-11	Fingerprick	NEG	NA
J0010121_1603	J0010121	FALSE	2016-03	Fingerprick	NEG	NA
J0010121_1610	J0010121	FALSE	2016-10	Fingerprick	NEG	NA
J0010121_1611	J0010121	FALSE	2016-11	Fingerprick	NEG	NA
J0010121_1612	J0010121	FALSE	2016-12	Fingerprick	NEG	NA
J0010122_1412	J0010122	FALSE	2014-12	Fingerprick	NEG	NA
J0010122_1511	J0010122	FALSE	2015-11	Fingerprick	NEG	NA
J0010122_1512	J0010122	FALSE	2015-12	Fingerprick	NEG	NA
J0010122_1603	J0010122	FALSE	2016-03	Fingerprick	NEG	NA
J0010122_1611	J0010122	FALSE	2016-11	Fingerprick	NEG	NA
J0010122_1612	J0010122	FALSE	2016-12	Fingerprick	NEG	NA
J0010123_1607	J0010123	FALSE	2016-07	Fingerprick	NEG	NA
J0010125_1412	J0010125	FALSE	2014-12	Fingerprick	NEG	NA
J0010125_1511	J0010125	FALSE	2015-11	Fingerprick	NEG	NA
J0010125_1512	J0010125	FALSE	2015-12	Fingerprick	NEG	NA
J0010125_1603	J0010125	FALSE	2016-03	Fingerprick	NEG	NA
J0010125_1612	J0010125	FALSE	2016-12	Fingerprick	NEG	NA
J0010126_1504	J0010126	FALSE	2015-04	Fingerprick	NEG	NA
J0010126_1512	J0010126	FALSE	2015-12	Fingerprick	NEG	NA
J0010127_1412	J0010127	FALSE	2014-12	Fingerprick	NEG	NA
J0010127_1511	J0010127	FALSE	2015-11	Fingerprick	NEG	NA
J0010127_1512	J0010127	FALSE	2015-12	Fingerprick	NEG	NA
J0010127_1607	J0010127	FALSE	2016-07	Fingerprick	NEG	NA
J0010127_1610	J0010127	FALSE	2016-10	Fingerprick	NEG	NA
J0010127_1611	J0010127	FALSE	2016-11	Fingerprick	NEG	NA
J0010127_1612	J0010127	FALSE	2016-12	Fingerprick	NEG	NA
J0010128_1504	J0010128	FALSE	2015-04	Fingerprick	NEG	NA
J0010128_1607	J0010128	FALSE	2016-07	Fingerprick	NEG	NA
J0010129_1412	J0010129	FALSE	2014-12	Fingerprick	POS	NA
J0010129_1511	J0010129	FALSE	2015-11	Fingerprick	NEG	NA
J0010129_1512	J0010129	FALSE	2015-12	Fingerprick	NEG	NA
J0010129_1603	J0010129	FALSE	2016-03	Fingerprick	NEG	NA
J0010129_1607	J0010129	FALSE	2016-07	Fingerprick	NEG	NA
J0010129_1610	J0010129	FALSE	2016-10	Fingerprick	NEG	NA
J0010129_1611	J0010129	FALSE	2016-11	Fingerprick	NEG	NA
J0010129_1612	J0010129	FALSE	2016-12	Fingerprick	NEG	NA
J0010130_1603	J0010130	FALSE	2016-03	Fingerprick	NEG	NA
J0010130_1610	J0010130	FALSE	2016-10	Fingerprick	NEG	NA
J0010130_1611	J0010130	FALSE	2016-11	Fingerprick	POS	NA
J0020201_1504	J0020201	FALSE	2015-04	Fingerprick	NEG	NA
J0020201_1512	J0020201	FALSE	2015-12	Fingerprick	NEG	NA
J0020201_1603	J0020201	FALSE	2016-03	Fingerprick	NEG	NA
J0020202_1412	J0020202	FALSE	2014-12	Fingerprick	POS	NA
J0020202_1511	J0020202	FALSE	2015-11	Fingerprick	NEG	NA
J0020202_1512	J0020202	FALSE	2015-12	Fingerprick	NEG	NA
J0020202_1603	J0020202	FALSE	2016-03	Fingerprick	NEG	NA
J0020202_1607	J0020202	FALSE	2016-07	Fingerprick	NEG	NA
J0020202_1612	J0020202	FALSE	2016-12	Fingerprick	NEG	NA
J0020203_1412	J0020203	FALSE	2014-12	Fingerprick	NEG	NA
J0020203_1511	J0020203	FALSE	2015-11	Fingerprick	NEG	NA
J0020203_1512	J0020203	FALSE	2015-12	Fingerprick	NEG	NA
J0020203_1603	J0020203	FALSE	2016-03	Fingerprick	NEG	NA
J0020203_1607	J0020203	FALSE	2016-07	Fingerprick	NEG	NA
J0020203_1612	J0020203	FALSE	2016-12	Fingerprick	NEG	NA
J0020204_1412	J0020204	FALSE	2014-12	Fingerprick	NEG	NA
J0020204_1504	J0020204	FALSE	2015-04	Fingerprick	NEG	NA
J0020204_1511	J0020204	FALSE	2015-11	Fingerprick	NEG	NA
J0020204_1512	J0020204	FALSE	2015-12	Fingerprick	NEG	NA
J0020204_1603	J0020204	FALSE	2016-03	Fingerprick	NEG	NA
J0020204_1607	J0020204	FALSE	2016-07	Fingerprick	NEG	NA
J0020204_1612	J0020204	FALSE	2016-12	Fingerprick	NEG	NA
J0020205_1412	J0020205	FALSE	2014-12	Fingerprick	NA	NA
J0020205_1511	J0020205	FALSE	2015-11	Fingerprick	NEG	NA
J0020205_1512	J0020205	FALSE	2015-12	Fingerprick	NEG	NA
J0020205_1603	J0020205	FALSE	2016-03	Fingerprick	NEG	NA
J0020206_1603	J0020206	FALSE	2016-03	Fingerprick	NEG	NA
J0020206_1607	J0020206	FALSE	2016-07	Fingerprick	NEG	NA
J0020207_1412	J0020207	FALSE	2014-12	Fingerprick	NEG	NA
J0020208_1412	J0020208	FALSE	2014-12	Fingerprick	POS	NA
J0020208_1504	J0020208	FALSE	2015-04	Fingerprick	NEG	NA
J0020208_1506	J0020208	FALSE	2015-06	Fingerprick	NEG	NA
J0020208_1511	J0020208	FALSE	2015-11	Fingerprick	NEG	NA
J0020208_1512	J0020208	FALSE	2015-12	Fingerprick	NEG	NA
J0020208_1603	J0020208	FALSE	2016-03	Fingerprick	NEG	NA
J0020208_1607	J0020208	FALSE	2016-07	Fingerprick	NEG	NA
J0020208_1612	J0020208	FALSE	2016-12	Fingerprick	NEG	NA
J0020209_1412	J0020209	FALSE	2014-12	Fingerprick	NEG	NA
J0020209_1504	J0020209	FALSE	2015-04	Fingerprick	NEG	NA
J0020209_1511	J0020209	FALSE	2015-11	Fingerprick	NEG	NA
J0020209_1512	J0020209	FALSE	2015-12	Fingerprick	NEG	NA
J0020209_1603	J0020209	FALSE	2016-03	Fingerprick	NEG	NA
J0020209_1607	J0020209	FALSE	2016-07	Fingerprick	NEG	NA
J0020209_1612	J0020209	FALSE	2016-12	Fingerprick	NEG	NA
J0020301_1412	J0020301	FALSE	2014-12	Fingerprick	POS	NA
J0020301_1511	J0020301	FALSE	2015-11	Fingerprick	NEG	NA
J0020301_1512	J0020301	FALSE	2015-12	Fingerprick	NEG	NA
J0020301_1603	J0020301	FALSE	2016-03	Fingerprick	NEG	NA
J0020301_1612	J0020301	FALSE	2016-12	Fingerprick	NEG	NA
J0020302_1412	J0020302	FALSE	2014-12	Fingerprick	NEG	NA
J0020302_1506	J0020302	FALSE	2015-06	Fingerprick	POS	NA
J0020302_1603	J0020302	FALSE	2016-03	Fingerprick	NEG	NA
J0020302_1612	J0020302	FALSE	2016-12	Fingerprick	NEG	NA
J0020303_1504	J0020303	FALSE	2015-04	Fingerprick	NEG	NA
J0020305_1603	J0020305	FALSE	2016-03	Fingerprick	NEG	NA
J0020306_1511	J0020306	FALSE	2015-11	Fingerprick	NEG	NA
J0020308_1603	J0020308	FALSE	2016-03	Fingerprick	NEG	NA
J0020308_1612	J0020308	FALSE	2016-12	Fingerprick	NEG	NA
J0020309_1504	J0020309	FALSE	2015-04	Fingerprick	NEG	NA
J0020309_1512	J0020309	FALSE	2015-12	Fingerprick	NEG	NA
J0020309_1603	J0020309	FALSE	2016-03	Fingerprick	NEG	NA
J0020310_1511	J0020310	FALSE	2015-11	Fingerprick	NEG	NA
J0020310_1512	J0020310	FALSE	2015-12	Fingerprick	POS	NA
J0020310_1607	J0020310	FALSE	2016-07	Fingerprick	NEG	NA
J0020310_1612	J0020310	FALSE	2016-12	Fingerprick	NEG	NA
J0020311_1412	J0020311	FALSE	2014-12	Fingerprick	NEG	NA
J0020311_1504	J0020311	FALSE	2015-04	Fingerprick	NEG	NA
J0020311_1511	J0020311	FALSE	2015-11	Fingerprick	NEG	NA
J0020311_1512	J0020311	FALSE	2015-12	Fingerprick	NEG	NA
J0020311_1603	J0020311	FALSE	2016-03	Fingerprick	NEG	NA
J0020311_1607	J0020311	FALSE	2016-07	Fingerprick	NEG	NA
J0020311_1612	J0020311	FALSE	2016-12	Fingerprick	NEG	NA
J0020312_1412	J0020312	FALSE	2014-12	Fingerprick	NEG	NA
J0020312_1504	J0020312	FALSE	2015-04	Fingerprick	NEG	NA
J0020312_1511	J0020312	FALSE	2015-11	Fingerprick	NEG	NA
J0020312_1512	J0020312	FALSE	2015-12	Fingerprick	NEG	NA
J0020312_1603	J0020312	FALSE	2016-03	Fingerprick	NEG	NA
J0020312_1607	J0020312	FALSE	2016-07	Fingerprick	NEG	NA
J0020312_1612	J0020312	FALSE	2016-12	Fingerprick	NEG	NA
J0020313_1412	J0020313	FALSE	2014-12	Fingerprick	POS	NA
J0020313_1511	J0020313	FALSE	2015-11	Fingerprick	NEG	NA
J0020313_1603	J0020313	FALSE	2016-03	Fingerprick	NEG	NA
J0020313_1607	J0020313	FALSE	2016-07	Fingerprick	NEG	NA
J0020314_1512	J0020314	FALSE	2015-12	Fingerprick	NEG	NA
J0020314_1603	J0020314	FALSE	2016-03	Fingerprick	NEG	NA
J0020314_1607	J0020314	FALSE	2016-07	Fingerprick	NEG	NA
J0020314_1612	J0020314	FALSE	2016-12	Fingerprick	NEG	NA
J0020315_1412	J0020315	FALSE	2014-12	Fingerprick	NEG	NA
J0020315_1511	J0020315	FALSE	2015-11	Fingerprick	NA	NA
J0020315_1603	J0020315	FALSE	2016-03	Fingerprick	NEG	NA
J0020315_1605	J0020315	FALSE	2016-05	Fingerprick	NEG	NA
J0020315_1607	J0020315	FALSE	2016-07	Fingerprick	NEG	NA
J0020315_1612	J0020315	FALSE	2016-12	Fingerprick	NEG	NA
J0020316_1412	J0020316	FALSE	2014-12	Fingerprick	NEG	NA
J0020316_1504	J0020316	FALSE	2015-04	Fingerprick	NEG	NA
J0020316_1603	J0020316	FALSE	2016-03	Fingerprick	NEG	NA
J0020316_1607	J0020316	FALSE	2016-07	Fingerprick	NEG	NA
J0020316_1612	J0020316	FALSE	2016-12	Fingerprick	NEG	NA
J0020317_1412	J0020317	FALSE	2014-12	Fingerprick	NEG	NA
J0020317_1511	J0020317	FALSE	2015-11	Fingerprick	NEG	NA
J0020317_1512	J0020317	FALSE	2015-12	Fingerprick	NEG	NA
J0020317_1603	J0020317	FALSE	2016-03	Fingerprick	NEG	NA
J0020317_1607	J0020317	FALSE	2016-07	Fingerprick	NEG	NA
J0020318_1412	J0020318	FALSE	2014-12	Fingerprick	NEG	NA
J0020318_1511	J0020318	FALSE	2015-11	Fingerprick	NEG	NA
J0020318_1512	J0020318	FALSE	2015-12	Fingerprick	NEG	NA
J0020318_1603	J0020318	FALSE	2016-03	Fingerprick	NEG	NA
J0020318_1607	J0020318	FALSE	2016-07	Fingerprick	NEG	NA
J0020318_1612	J0020318	FALSE	2016-12	Fingerprick	NEG	NA
J0020319_1511	J0020319	FALSE	2015-11	Fingerprick	NEG	NA
J0020319_1512	J0020319	FALSE	2015-12	Fingerprick	NEG	NA
J0020319_1603	J0020319	FALSE	2016-03	Fingerprick	NEG	NA
J0020319_1607	J0020319	FALSE	2016-07	Fingerprick	NEG	NA
J0020319_1612	J0020319	FALSE	2016-12	Fingerprick	NEG	NA
J0020321_1504	J0020321	FALSE	2015-04	Fingerprick	NEG	NA
J0020321_1511	J0020321	FALSE	2015-11	Fingerprick	NEG	NA
J0020321_1512	J0020321	FALSE	2015-12	Fingerprick	NEG	NA
J0020322_1412	J0020322	FALSE	2014-12	Fingerprick	NEG	NA
J0020322_1511	J0020322	FALSE	2015-11	Fingerprick	POS	NA
J0020322_1603	J0020322	FALSE	2016-03	Fingerprick	NEG	NA
J0020322_1612	J0020322	FALSE	2016-12	Fingerprick	NEG	NA
J0020323_1512	J0020323	FALSE	2015-12	Fingerprick	NEG	NA
J0020323_1603	J0020323	FALSE	2016-03	Fingerprick	NEG	NA
J0020323_1607	J0020323	FALSE	2016-07	Fingerprick	NEG	NA
J0020324_1412	J0020324	FALSE	2014-12	Fingerprick	NEG	NA
J0020325_1512	J0020325	FALSE	2015-12	Fingerprick	NEG	NA
J0020325_1603	J0020325	FALSE	2016-03	Fingerprick	NEG	NA
J0020325_1607	J0020325	FALSE	2016-07	Fingerprick	NEG	NA
J0020325_1612	J0020325	FALSE	2016-12	Fingerprick	NEG	NA
J0020326_1512	J0020326	FALSE	2015-12	Fingerprick	NEG	NA
J0020326_1607	J0020326	FALSE	2016-07	Fingerprick	NEG	NA
J0020327_1412	J0020327	FALSE	2014-12	Fingerprick	NA	NA
J0020328_1504	J0020328	FALSE	2015-04	Fingerprick	NEG	NA
J0020329_1412	J0020329	FALSE	2014-12	Fingerprick	NEG	NA
J0020329_1603	J0020329	FALSE	2016-03	Fingerprick	NEG	NA
J0020329_1607	J0020329	FALSE	2016-07	Fingerprick	NEG	NA
J0020330_1603	J0020330	FALSE	2016-03	Fingerprick	NEG	NA
J0020331_1603	J0020331	FALSE	2016-03	Fingerprick	NEG	NA
J0020331_1607	J0020331	FALSE	2016-07	Fingerprick	NEG	NA
J0030402_1412	J0030402	FALSE	2014-12	Fingerprick	NEG	NA
J0030402_1504	J0030402	FALSE	2015-04	Fingerprick	NEG	NA
J0030402_1610	J0030402	FALSE	2016-10	Fingerprick	NEG	NA
J0030402_1611	J0030402	FALSE	2016-11	Fingerprick	NEG	NA
J0030402_1612	J0030402	FALSE	2016-12	Fingerprick	NEG	NA
J0030405_1504	J0030405	FALSE	2015-04	Fingerprick	NEG	NA
J0030405_1512	J0030405	FALSE	2015-12	Fingerprick	NEG	NA
J0030405_1607	J0030405	FALSE	2016-07	Fingerprick	NEG	NA
J0030405_1610	J0030405	FALSE	2016-10	Fingerprick	NEG	NA
J0030405_1611	J0030405	FALSE	2016-11	Fingerprick	NEG	NA
J0030405_1612	J0030405	FALSE	2016-12	Fingerprick	NEG	NA
J0030406_1512	J0030406	FALSE	2015-12	Fingerprick	NEG	NA
J0030406_1607	J0030406	FALSE	2016-07	Fingerprick	NEG	NA
J0030406_1610	J0030406	FALSE	2016-10	Fingerprick	NEG	NA
J0030406_1611	J0030406	FALSE	2016-11	Fingerprick	POS	NA
J0030406_1612	J0030406	TRUE	2016-12	Fingerprick	POS	NA
J0030406_1701	J0030406	TRUE	2017-01	Venous blood	POS	NA
J0030406_1702	J0030406	TRUE	2017-02	Venous blood	POS	NA
J0030406_1704	J0030406	TRUE	2017-04	Venous blood	POS	NA
J0030406_1705	J0030406	TRUE	2017-05	Venous blood	POS	NA
J0030407_1504	J0030407	FALSE	2015-04	Fingerprick	NEG	NA
J0030407_1506	J0030407	FALSE	2015-06	Fingerprick	NEG	NA
J0030407_1511	J0030407	FALSE	2015-11	Fingerprick	NEG	NA
J0030407_1512	J0030407	FALSE	2015-12	Fingerprick	POS	NA
J0030407_1607	J0030407	FALSE	2016-07	Fingerprick	NEG	NA
J0030407_1610	J0030407	FALSE	2016-10	Fingerprick	NEG	NA
J0030407_1611	J0030407	FALSE	2016-11	Fingerprick	NEG	NA
J0030407_1612	J0030407	FALSE	2016-12	Fingerprick	NEG	NA
J0030408_1511	J0030408	FALSE	2015-11	Fingerprick	NEG	NA
J0030408_1512	J0030408	FALSE	2015-12	Fingerprick	NEG	NA
J0030408_1607	J0030408	FALSE	2016-07	Fingerprick	NEG	NA
J0030408_1610	J0030408	FALSE	2016-10	Fingerprick	NEG	NA
J0030408_1611	J0030408	FALSE	2016-11	Fingerprick	NEG	NA
J0030408_1612	J0030408	FALSE	2016-12	Fingerprick	NEG	NA
J0030409_1504	J0030409	FALSE	2015-04	Fingerprick	NEG	NA
J0030409_1607	J0030409	FALSE	2016-07	Fingerprick	POS	NA
J0030409_1610	J0030409	FALSE	2016-10	Venous blood	POS	2016-10
J0030409_1611	J0030409	FALSE	2016-11	Fingerprick	POS	NA
J0030409_1612	J0030409	FALSE	2016-12	Fingerprick	NEG	NA
J0030411_1412	J0030411	FALSE	2014-12	Fingerprick	NEG	NA
J0030412_1504	J0030412	FALSE	2015-04	Fingerprick	POS	NA
J0030412_1607	J0030412	FALSE	2016-07	Fingerprick	NEG	NA
J0030412_1610	J0030412	FALSE	2016-10	Fingerprick	NEG	NA
J0030413_1412	J0030413	FALSE	2014-12	Fingerprick	NEG	NA
J0030413_1512	J0030413	FALSE	2015-12	Fingerprick	NEG	NA
J0030413_1612	J0030413	FALSE	2016-12	Fingerprick	NEG	NA
J0030415_1412	J0030415	FALSE	2014-12	Fingerprick	NEG	NA
J0030415_1607	J0030415	FALSE	2016-07	Fingerprick	NEG	NA
J0030415_1611	J0030415	FALSE	2016-11	Fingerprick	NEG	NA
J0030415_1612	J0030415	FALSE	2016-12	Fingerprick	NEG	NA
J0030416_1412	J0030416	FALSE	2014-12	Fingerprick	NEG	NA
J0030416_1512	J0030416	FALSE	2015-12	Fingerprick	NEG	NA
J0030417_1412	J0030417	FALSE	2014-12	Fingerprick	POS	NA
J0030417_1612	J0030417	FALSE	2016-12	Fingerprick	NEG	NA
J0030420_1412	J0030420	FALSE	2014-12	Fingerprick	NEG	NA
J0030420_1610	J0030420	FALSE	2016-10	Fingerprick	NEG	NA
J0030420_1612	J0030420	FALSE	2016-12	Fingerprick	NEG	NA
J0040502_1412	J0040502	FALSE	2014-12	Fingerprick	NEG	NA
J0040502_1603	J0040502	FALSE	2016-03	Fingerprick	NEG	NA
J0040502_1607	J0040502	FALSE	2016-07	Fingerprick	NEG	NA
J0040502_1612	J0040502	FALSE	2016-12	Fingerprick	NEG	NA
J0040503_1504	J0040503	FALSE	2015-04	Fingerprick	NEG	NA
J0040504_1504	J0040504	FALSE	2015-04	Fingerprick	NEG	NA
J0040504_1511	J0040504	FALSE	2015-11	Fingerprick	POS	NA
J0040504_1603	J0040504	FALSE	2016-03	Fingerprick	NEG	NA
J0040504_1605	J0040504	FALSE	2016-05	Fingerprick	NEG	NA
J0040504_1612	J0040504	FALSE	2016-12	Fingerprick	NEG	NA
J0040505_1504	J0040505	FALSE	2015-04	Fingerprick	NEG	NA
J0040505_1603	J0040505	FALSE	2016-03	Fingerprick	NEG	NA
J0050602_1504	J0050602	FALSE	2015-04	Fingerprick	NEG	NA
J0050602_1511	J0050602	FALSE	2015-11	Fingerprick	NEG	NA
J0050602_1512	J0050602	FALSE	2015-12	Fingerprick	NEG	NA
J0050602_1603	J0050602	FALSE	2016-03	Fingerprick	NEG	NA
J0050602_1611	J0050602	FALSE	2016-11	Fingerprick	POS	NA
J0050603_1412	J0050603	FALSE	2014-12	Fingerprick	NEG	NA
J0050604_1412	J0050604	FALSE	2014-12	Fingerprick	NEG	NA
J0050604_1504	J0050604	FALSE	2015-04	Fingerprick	NEG	NA
J0050604_1511	J0050604	FALSE	2015-11	Fingerprick	NEG	NA
J0050604_1512	J0050604	FALSE	2015-12	Fingerprick	NEG	NA
J0050604_1610	J0050604	FALSE	2016-10	Fingerprick	NEG	NA
J0050604_1611	J0050604	FALSE	2016-11	Fingerprick	NEG	NA
J0050604_1612	J0050604	FALSE	2016-12	Fingerprick	NEG	NA
J0050605_1412	J0050605	FALSE	2014-12	Fingerprick	NEG	NA
J0050605_1511	J0050605	FALSE	2015-11	Fingerprick	POS	NA
J0050605_1512	J0050605	FALSE	2015-12	Fingerprick	NEG	NA
J0050605_1603	J0050605	FALSE	2016-03	Fingerprick	NEG	NA
J0050605_1612	J0050605	FALSE	2016-12	Fingerprick	NEG	NA
J0050606_1412	J0050606	FALSE	2014-12	Fingerprick	NA	NA
J0050606_1504	J0050606	FALSE	2015-04	Fingerprick	NEG	NA
J0050606_1512	J0050606	FALSE	2015-12	Fingerprick	NEG	NA
J0050606_1611	J0050606	FALSE	2016-11	Fingerprick	NEG	NA
J0050607_1412	J0050607	FALSE	2014-12	Fingerprick	POS	NA
J0050607_1511	J0050607	FALSE	2015-11	Fingerprick	NEG	NA
J0050607_1512	J0050607	FALSE	2015-12	Fingerprick	NEG	NA
J0050607_1603	J0050607	FALSE	2016-03	Fingerprick	NEG	NA
J0050607_1611	J0050607	FALSE	2016-11	Venous blood	POS	2016-11
J0050608_1412	J0050608	FALSE	2014-12	Fingerprick	NEG	NA
J0050608_1504	J0050608	FALSE	2015-04	Fingerprick	NEG	NA
J0050608_1511	J0050608	FALSE	2015-11	Fingerprick	NEG	NA
J0050608_1512	J0050608	FALSE	2015-12	Fingerprick	NEG	NA
J0050608_1603	J0050608	FALSE	2016-03	Fingerprick	NEG	NA
J0050608_1611	J0050608	FALSE	2016-11	Fingerprick	NEG	NA
J0050608_1612	J0050608	FALSE	2016-12	Fingerprick	NEG	NA
J0050610_1412	J0050610	FALSE	2014-12	Fingerprick	NEG	NA
J0050610_1611	J0050610	FALSE	2016-11	Fingerprick	POS	NA
J0050611_1504	J0050611	FALSE	2015-04	Fingerprick	NEG	NA
J0050611_1511	J0050611	FALSE	2015-11	Fingerprick	NEG	NA
J0050611_1512	J0050611	FALSE	2015-12	Fingerprick	NEG	NA
J0050611_1610	J0050611	FALSE	2016-10	Fingerprick	NEG	NA
J0050611_1611	J0050611	FALSE	2016-11	Fingerprick	POS	NA
J0050611_1612	J0050611	FALSE	2016-12	Fingerprick	NEG	NA
J0050612_1603	J0050612	FALSE	2016-03	Fingerprick	NEG	NA
J0050612_1610	J0050612	FALSE	2016-10	Fingerprick	NEG	NA
J0050612_1611	J0050612	FALSE	2016-11	Fingerprick	NEG	NA
J0050612_1612	J0050612	FALSE	2016-12	Fingerprick	NEG	NA
J0050613_1504	J0050613	FALSE	2015-04	Fingerprick	NEG	NA
J0050613_1512	J0050613	FALSE	2015-12	Fingerprick	NEG	NA
J0050613_1610	J0050613	FALSE	2016-10	Fingerprick	NEG	NA
J0050613_1611	J0050613	FALSE	2016-11	Fingerprick	NEG	NA
J0050613_1612	J0050613	FALSE	2016-12	Fingerprick	NEG	NA
J0050614_1412	J0050614	FALSE	2014-12	Fingerprick	NEG	NA
J0050614_1512	J0050614	FALSE	2015-12	Fingerprick	NEG	NA
J0050614_1603	J0050614	FALSE	2016-03	Fingerprick	NEG	NA
J0050614_1607	J0050614	FALSE	2016-07	Fingerprick	NEG	NA
J0050614_1610	J0050614	FALSE	2016-10	Fingerprick	NEG	NA
J0050614_1611	J0050614	FALSE	2016-11	Fingerprick	NEG	NA
J0050614_1612	J0050614	FALSE	2016-12	Fingerprick	NEG	NA
J0050615_1412	J0050615	FALSE	2014-12	Fingerprick	NEG	NA
J0050615_1504	J0050615	FALSE	2015-04	Fingerprick	NEG	NA
J0050615_1512	J0050615	FALSE	2015-12	Fingerprick	NEG	NA
J0050615_1603	J0050615	FALSE	2016-03	Fingerprick	NEG	NA
J0050615_1607	J0050615	FALSE	2016-07	Fingerprick	NEG	NA
J0050615_1610	J0050615	FALSE	2016-10	Fingerprick	NEG	NA
J0050615_1611	J0050615	FALSE	2016-11	Fingerprick	NEG	NA
J0050615_1612	J0050615	FALSE	2016-12	Fingerprick	NEG	NA
J0050616_1412	J0050616	FALSE	2014-12	Fingerprick	NEG	NA
J0050616_1512	J0050616	FALSE	2015-12	Fingerprick	POS	NA
J0050616_1603	J0050616	FALSE	2016-03	Fingerprick	NEG	NA
J0050616_1605	J0050616	FALSE	2016-05	Fingerprick	NEG	NA
J0050616_1610	J0050616	FALSE	2016-10	Venous blood	POS	2016-10
J0050616_1611	J0050616	FALSE	2016-11	Fingerprick	NEG	NA
J0050616_1612	J0050616	FALSE	2016-12	Fingerprick	NEG	NA
J0050617_1412	J0050617	FALSE	2014-12	Fingerprick	NEG	NA
J0050617_1504	J0050617	FALSE	2015-04	Fingerprick	NEG	NA
J0050617_1611	J0050617	FALSE	2016-11	Venous blood	POS	2016-11
J0050617_1612	J0050617	FALSE	2016-12	Fingerprick	NEG	NA
J0050618_1412	J0050618	FALSE	2014-12	Fingerprick	NEG	NA
J0050618_1504	J0050618	FALSE	2015-04	Fingerprick	NEG	NA
J0050618_1610	J0050618	FALSE	2016-10	Venous blood	POS	2016-10
J0050618_1611	J0050618	FALSE	2016-11	Fingerprick	POS	2016-11
J0050618_1612	J0050618	FALSE	2016-12	Fingerprick	NEG	NA
J0050619_1412	J0050619	FALSE	2014-12	Fingerprick	NEG	NA
J0050619_1504	J0050619	FALSE	2015-04	Fingerprick	NEG	NA
J0050619_1512	J0050619	FALSE	2015-12	Fingerprick	NEG	NA
J0050619_1610	J0050619	FALSE	2016-10	Fingerprick	NEG	NA
J0050619_1611	J0050619	FALSE	2016-11	Fingerprick	NEG	NA
J0050619_1612	J0050619	FALSE	2016-12	Fingerprick	NEG	NA
J0060701_1504	J0060701	FALSE	2015-04	Fingerprick	NEG	NA
J0060701_1511	J0060701	FALSE	2015-11	Fingerprick	POS	NA
J0060701_1512	J0060701	FALSE	2015-12	Fingerprick	NEG	NA
J0060701_1603	J0060701	FALSE	2016-03	Fingerprick	NEG	NA
J0060702_1412	J0060702	FALSE	2014-12	Fingerprick	NEG	NA
J0060702_1511	J0060702	FALSE	2015-11	Fingerprick	NEG	NA
J0060702_1512	J0060702	FALSE	2015-12	Fingerprick	NEG	NA
J0060702_1603	J0060702	FALSE	2016-03	Fingerprick	NEG	NA
J0060702_1612	J0060702	FALSE	2016-12	Fingerprick	NEG	NA
J0060703_1506	J0060703	FALSE	2015-06	Fingerprick	NEG	NA
J0060703_1511	J0060703	FALSE	2015-11	Fingerprick	NEG	NA
J0060703_1512	J0060703	FALSE	2015-12	Fingerprick	NEG	NA
J0060703_1603	J0060703	FALSE	2016-03	Fingerprick	NEG	NA
J0060704_1504	J0060704	FALSE	2015-04	Fingerprick	NEG	NA
J0060704_1511	J0060704	FALSE	2015-11	Fingerprick	POS	NA
J0060704_1512	J0060704	FALSE	2015-12	Fingerprick	NEG	NA
J0060704_1603	J0060704	FALSE	2016-03	Fingerprick	NEG	NA
J0060704_1607	J0060704	FALSE	2016-07	Fingerprick	NEG	NA
J0060704_1612	J0060704	FALSE	2016-12	Fingerprick	NEG	NA
J0060706_1504	J0060706	FALSE	2015-04	Fingerprick	NEG	NA
J0060706_1512	J0060706	FALSE	2015-12	Fingerprick	NEG	NA
J0060706_1603	J0060706	FALSE	2016-03	Fingerprick	NEG	NA
J0060706_1607	J0060706	FALSE	2016-07	Fingerprick	NEG	NA
J0060706_1612	J0060706	FALSE	2016-12	Fingerprick	NEG	NA
J0060707_1612	J0060707	FALSE	2016-12	Fingerprick	NEG	NA
J0070802_1511	J0070802	FALSE	2015-11	Fingerprick	NEG	NA
J0070802_1611	J0070802	FALSE	2016-11	Fingerprick	NEG	NA
J0070804_1610	J0070804	FALSE	2016-10	Venous blood	POS	2016-10
J0070805_1603	J0070805	FALSE	2016-03	Fingerprick	NEG	NA
J0070805_1610	J0070805	FALSE	2016-10	Fingerprick	NEG	NA
J0070805_1611	J0070805	FALSE	2016-11	Fingerprick	NEG	NA
J0070805_1612	J0070805	FALSE	2016-12	Fingerprick	NEG	NA
J0070806_1412	J0070806	FALSE	2014-12	Fingerprick	NA	NA
J0080901_1603	J0080901	FALSE	2016-03	Fingerprick	NEG	NA
J0080901_1612	J0080901	FALSE	2016-12	Fingerprick	NEG	NA
J0080902_1511	J0080902	FALSE	2015-11	Fingerprick	NEG	NA
J0080902_1512	J0080902	FALSE	2015-12	Fingerprick	NEG	NA
J0080902_1612	J0080902	FALSE	2016-12	Fingerprick	NEG	NA
J0080903_1504	J0080903	FALSE	2015-04	Fingerprick	NEG	NA
J0080903_1511	J0080903	FALSE	2015-11	Fingerprick	NEG	NA
J0080903_1512	J0080903	FALSE	2015-12	Fingerprick	NEG	NA
J0080903_1603	J0080903	FALSE	2016-03	Fingerprick	NEG	NA
J0080903_1607	J0080903	FALSE	2016-07	Fingerprick	NEG	NA
J0080903_1612	J0080903	FALSE	2016-12	Fingerprick	NEG	NA
J0080905_1511	J0080905	FALSE	2015-11	Fingerprick	NEG	NA
J0080906_1504	J0080906	FALSE	2015-04	Fingerprick	NEG	NA
J0080906_1511	J0080906	FALSE	2015-11	Fingerprick	POS	NA
J0080906_1512	J0080906	FALSE	2015-12	Fingerprick	NEG	NA
J0080906_1603	J0080906	FALSE	2016-03	Fingerprick	NEG	NA
J0080908_1412	J0080908	FALSE	2014-12	Fingerprick	NEG	NA
J0080908_1504	J0080908	FALSE	2015-04	Fingerprick	NEG	NA
J0080908_1512	J0080908	FALSE	2015-12	Fingerprick	NEG	NA
J0080908_1603	J0080908	FALSE	2016-03	Fingerprick	NEG	NA
J0080908_1612	J0080908	FALSE	2016-12	Fingerprick	NEG	NA
J0091001_1610	J0091001	FALSE	2016-10	Fingerprick	POS	NA
J0091001_1611	J0091001	FALSE	2016-11	Fingerprick	NEG	NA
J0091001_1612	J0091001	FALSE	2016-12	Fingerprick	NEG	NA
J0091002_1504	J0091002	FALSE	2015-04	Fingerprick	NEG	NA
J0091002_1603	J0091002	FALSE	2016-03	Fingerprick	NEG	NA
J0091002_1610	J0091002	FALSE	2016-10	Fingerprick	NEG	NA
J0091002_1612	J0091002	FALSE	2016-12	Fingerprick	NEG	NA
J0091003_1504	J0091003	FALSE	2015-04	Fingerprick	NEG	NA
J0091003_1603	J0091003	FALSE	2016-03	Fingerprick	NEG	NA
J0091003_1607	J0091003	FALSE	2016-07	Fingerprick	NEG	NA
J0091003_1611	J0091003	FALSE	2016-11	Fingerprick	NEG	NA
J0091003_1612	J0091003	FALSE	2016-12	Fingerprick	NEG	NA
J0091004_1610	J0091004	FALSE	2016-10	Fingerprick	NEG	NA
J0091005_1603	J0091005	FALSE	2016-03	Fingerprick	POS	NA
J0091005_1607	J0091005	FALSE	2016-07	Venous blood	NEG	NA
J0091005_1610	J0091005	FALSE	2016-10	Fingerprick	NEG	NA
J0091005_1611	J0091005	FALSE	2016-11	Venous blood	NEG	NA
J0091006_1412	J0091006	FALSE	2014-12	Fingerprick	NEG	NA
J0091006_1504	J0091006	FALSE	2015-04	Fingerprick	NEG	NA
J0091006_1603	J0091006	FALSE	2016-03	Fingerprick	NEG	NA
J0101101_1504	J0101101	FALSE	2015-04	Fingerprick	NEG	NA
J0101101_1511	J0101101	FALSE	2015-11	Fingerprick	NEG	NA
J0101102_1412	J0101102	FALSE	2014-12	Fingerprick	NEG	NA
J0101102_1504	J0101102	FALSE	2015-04	Fingerprick	NEG	NA
J0101102_1612	J0101102	FALSE	2016-12	Fingerprick	NEG	NA
J0101103_1511	J0101103	FALSE	2015-11	Fingerprick	NEG	NA
J0101103_1512	J0101103	FALSE	2015-12	Fingerprick	NEG	NA
J0101103_1603	J0101103	FALSE	2016-03	Fingerprick	NEG	NA
J0101103_1612	J0101103	TRUE	2016-12	Fingerprick	POS	NA
J0101103_1701	J0101103	TRUE	2017-01	Venous blood	POS	NA
J0101103_1702	J0101103	TRUE	2017-02	Venous blood	POS	NA
J0101103_1703	J0101103	TRUE	2017-03	Venous blood	POS	NA
J0101103_1704	J0101103	TRUE	2017-04	Fingerprick	POS	NA
J0101103_1705	J0101103	TRUE	2017-05	Venous blood	POS	NA
J0101104_1412	J0101104	FALSE	2014-12	Fingerprick	NEG	NA
J0101104_1512	J0101104	FALSE	2015-12	Fingerprick	NEG	NA
J0101104_1612	J0101104	FALSE	2016-12	Fingerprick	NEG	NA
J0101105_1504	J0101105	FALSE	2015-04	Fingerprick	NEG	NA
J0101105_1511	J0101105	FALSE	2015-11	Fingerprick	NEG	NA
J0101105_1512	J0101105	FALSE	2015-12	Fingerprick	NEG	NA
J0101105_1603	J0101105	FALSE	2016-03	Fingerprick	NEG	NA
J0101105_1607	J0101105	FALSE	2016-07	Fingerprick	NEG	NA
J0101105_1612	J0101105	FALSE	2016-12	Fingerprick	NEG	NA
J0101106_1412	J0101106	FALSE	2014-12	Fingerprick	NEG	NA
J0101106_1511	J0101106	FALSE	2015-11	Fingerprick	NEG	NA
J0101106_1512	J0101106	FALSE	2015-12	Fingerprick	NEG	NA
J0101106_1607	J0101106	FALSE	2016-07	Fingerprick	NEG	NA
J0101106_1612	J0101106	FALSE	2016-12	Fingerprick	NEG	NA
J0101107_1412	J0101107	FALSE	2014-12	Fingerprick	NEG	NA
J0101107_1504	J0101107	FALSE	2015-04	Fingerprick	NEG	NA
J0101107_1511	J0101107	FALSE	2015-11	Fingerprick	NEG	NA
J0101107_1512	J0101107	FALSE	2015-12	Fingerprick	NEG	NA
J0101107_1603	J0101107	FALSE	2016-03	Fingerprick	NEG	NA
J0101107_1607	J0101107	FALSE	2016-07	Fingerprick	NEG	NA
J0101107_1612	J0101107	FALSE	2016-12	Fingerprick	NEG	NA
J0101108_1412	J0101108	FALSE	2014-12	Fingerprick	NEG	NA
J0101108_1504	J0101108	FALSE	2015-04	Fingerprick	NEG	NA
J0101109_1412	J0101109	FALSE	2014-12	Fingerprick	NEG	NA
J0101109_1511	J0101109	FALSE	2015-11	Fingerprick	NEG	NA
J0101109_1512	J0101109	FALSE	2015-12	Fingerprick	NEG	NA
J0101109_1603	J0101109	FALSE	2016-03	Fingerprick	NEG	NA
J0101109_1607	J0101109	FALSE	2016-07	Fingerprick	NEG	NA
J0101109_1612	J0101109	FALSE	2016-12	Fingerprick	NEG	NA
J0101110_1412	J0101110	FALSE	2014-12	Fingerprick	NEG	NA
J0101110_1511	J0101110	FALSE	2015-11	Fingerprick	NEG	NA
J0101110_1512	J0101110	FALSE	2015-12	Fingerprick	NEG	NA
J0101110_1603	J0101110	FALSE	2016-03	Fingerprick	NEG	NA
J0101110_1612	J0101110	FALSE	2016-12	Fingerprick	NEG	NA
J0101111_1412	J0101111	FALSE	2014-12	Fingerprick	NEG	NA
J0101111_1504	J0101111	FALSE	2015-04	Fingerprick	NEG	NA
J0101111_1511	J0101111	FALSE	2015-11	Fingerprick	NEG	NA
J0101111_1512	J0101111	FALSE	2015-12	Fingerprick	NEG	NA
J0101111_1603	J0101111	FALSE	2016-03	Fingerprick	NEG	NA
J0101111_1607	J0101111	FALSE	2016-07	Fingerprick	NEG	NA
J0101111_1612	J0101111	FALSE	2016-12	Fingerprick	NEG	NA
J0101112_1412	J0101112	FALSE	2014-12	Fingerprick	NEG	NA
J0101112_1504	J0101112	FALSE	2015-04	Fingerprick	NEG	NA
J0101112_1511	J0101112	FALSE	2015-11	Fingerprick	NEG	NA
J0101112_1603	J0101112	FALSE	2016-03	Fingerprick	NEG	NA
J0101112_1612	J0101112	FALSE	2016-12	Fingerprick	NEG	NA
J0111201_1412	J0111201	FALSE	2014-12	Fingerprick	POS	NA
J0111201_1504	J0111201	FALSE	2015-04	Fingerprick	NEG	NA
J0111201_1511	J0111201	FALSE	2015-11	Fingerprick	NEG	NA
J0111201_1512	J0111201	FALSE	2015-12	Fingerprick	NEG	NA
J0111201_1612	J0111201	FALSE	2016-12	Fingerprick	NEG	NA
J0111202_1412	J0111202	FALSE	2014-12	Fingerprick	NEG	NA
J0111202_1504	J0111202	FALSE	2015-04	Fingerprick	NEG	NA
J0111202_1511	J0111202	FALSE	2015-11	Fingerprick	NEG	NA
J0111202_1512	J0111202	FALSE	2015-12	Fingerprick	NEG	NA
J0111202_1603	J0111202	FALSE	2016-03	Fingerprick	NEG	NA
J0111202_1610	J0111202	FALSE	2016-10	Fingerprick	NEG	NA
J0111202_1612	J0111202	FALSE	2016-12	Fingerprick	NEG	NA
J0111203_1504	J0111203	FALSE	2015-04	Fingerprick	NEG	NA
J0111203_1603	J0111203	FALSE	2016-03	Fingerprick	NEG	NA
J0111204_1412	J0111204	FALSE	2014-12	Fingerprick	NA	NA
J0111204_1504	J0111204	FALSE	2015-04	Fingerprick	NEG	NA
J0111204_1512	J0111204	FALSE	2015-12	Fingerprick	NEG	NA
J0111204_1603	J0111204	FALSE	2016-03	Fingerprick	NEG	NA
J0111204_1610	J0111204	FALSE	2016-10	Fingerprick	NEG	NA
J0111204_1611	J0111204	FALSE	2016-11	Fingerprick	NEG	NA
J0111204_1612	J0111204	FALSE	2016-12	Fingerprick	NEG	NA
J0111205_1412	J0111205	FALSE	2014-12	Fingerprick	NEG	NA
J0111205_1504	J0111205	FALSE	2015-04	Fingerprick	NEG	NA
J0111205_1603	J0111205	FALSE	2016-03	Fingerprick	NEG	NA
J0111205_1610	J0111205	FALSE	2016-10	Fingerprick	NEG	NA
J0111205_1611	J0111205	FALSE	2016-11	Fingerprick	NEG	NA
J0111205_1612	J0111205	FALSE	2016-12	Fingerprick	NEG	NA
J0111206_1504	J0111206	FALSE	2015-04	Fingerprick	NEG	NA
J0111206_1603	J0111206	FALSE	2016-03	Fingerprick	NEG	NA
J0111206_1610	J0111206	FALSE	2016-10	Fingerprick	NEG	NA
J0111206_1612	J0111206	FALSE	2016-12	Fingerprick	NEG	NA
J0111207_1412	J0111207	FALSE	2014-12	Fingerprick	NEG	NA
J0111207_1504	J0111207	FALSE	2015-04	Fingerprick	NEG	NA
J0111207_1511	J0111207	FALSE	2015-11	Fingerprick	NEG	NA
J0111207_1512	J0111207	FALSE	2015-12	Fingerprick	NEG	NA
J0111207_1603	J0111207	FALSE	2016-03	Fingerprick	NEG	NA
J0111207_1607	J0111207	FALSE	2016-07	Fingerprick	NEG	NA
J0111207_1610	J0111207	FALSE	2016-10	Fingerprick	NEG	NA
J0111207_1611	J0111207	FALSE	2016-11	Fingerprick	NEG	NA
J0111207_1612	J0111207	FALSE	2016-12	Fingerprick	NEG	NA
J0111208_1412	J0111208	FALSE	2014-12	Fingerprick	NEG	NA
J0111208_1504	J0111208	FALSE	2015-04	Fingerprick	NEG	NA
J0111208_1610	J0111208	FALSE	2016-10	Venous blood	POS	2016-10
J0111208_1611	J0111208	FALSE	2016-11	Venous blood	POS	NA
J0111209_1412	J0111209	FALSE	2014-12	Fingerprick	POS	NA
J0111209_1504	J0111209	FALSE	2015-04	Fingerprick	NEG	NA
J0111209_1512	J0111209	FALSE	2015-12	Fingerprick	NEG	NA
J0111209_1603	J0111209	FALSE	2016-03	Fingerprick	NEG	NA
J0111209_1607	J0111209	FALSE	2016-07	Fingerprick	NEG	NA
J0111209_1610	J0111209	FALSE	2016-10	Fingerprick	NEG	NA
J0111209_1611	J0111209	FALSE	2016-11	Fingerprick	NEG	NA
J0111209_1612	J0111209	FALSE	2016-12	Fingerprick	NEG	NA
J0111210_1412	J0111210	FALSE	2014-12	Fingerprick	NEG	NA
J0111210_1504	J0111210	FALSE	2015-04	Fingerprick	NEG	NA
J0111210_1512	J0111210	FALSE	2015-12	Fingerprick	NEG	NA
J0111210_1603	J0111210	FALSE	2016-03	Fingerprick	NEG	NA
J0111210_1610	J0111210	FALSE	2016-10	Venous blood	POS	2016-10
J0111211_1412	J0111211	FALSE	2014-12	Fingerprick	POS	NA
J0111211_1504	J0111211	FALSE	2015-04	Fingerprick	NEG	NA
J0111211_1512	J0111211	FALSE	2015-12	Fingerprick	NEG	NA
J0111211_1603	J0111211	FALSE	2016-03	Fingerprick	NEG	NA
J0111211_1610	J0111211	FALSE	2016-10	Fingerprick	NEG	NA
J0111211_1611	J0111211	FALSE	2016-11	Fingerprick	NEG	NA
J0111211_1612	J0111211	FALSE	2016-12	Fingerprick	NEG	NA
J0121302_1512	J0121302	FALSE	2015-12	Fingerprick	NEG	NA
J0121302_1612	J0121302	TRUE	2016-12	Fingerprick	POS	NA
J0121303_1512	J0121303	FALSE	2015-12	Fingerprick	NEG	NA
J0121303_1612	J0121303	FALSE	2016-12	Fingerprick	NEG	NA
J0121304_1504	J0121304	FALSE	2015-04	Fingerprick	NEG	NA
J0121304_1511	J0121304	FALSE	2015-11	Fingerprick	NEG	NA
J0121304_1512	J0121304	FALSE	2015-12	Fingerprick	NEG	NA
J0121304_1603	J0121304	FALSE	2016-03	Fingerprick	NEG	NA
J0121304_1612	J0121304	FALSE	2016-12	Fingerprick	NEG	NA
J0121305_1512	J0121305	FALSE	2015-12	Fingerprick	NEG	NA
J0121305_1612	J0121305	FALSE	2016-12	Fingerprick	NEG	NA
J0121306_1603	J0121306	FALSE	2016-03	Fingerprick	NEG	NA
J0121306_1612	J0121306	FALSE	2016-12	Fingerprick	NEG	NA
J0121307_1512	J0121307	FALSE	2015-12	Fingerprick	NEG	NA
J0121308_1504	J0121308	FALSE	2015-04	Fingerprick	NEG	NA
J0121308_1511	J0121308	FALSE	2015-11	Fingerprick	NEG	NA
J0121308_1512	J0121308	FALSE	2015-12	Fingerprick	NEG	NA
J0121308_1603	J0121308	FALSE	2016-03	Fingerprick	NEG	NA
J0121308_1607	J0121308	FALSE	2016-07	Fingerprick	NEG	NA
J0121309_1412	J0121309	FALSE	2014-12	Fingerprick	POS	NA
J0121309_1603	J0121309	FALSE	2016-03	Fingerprick	NEG	NA
J0121310_1412	J0121310	FALSE	2014-12	Fingerprick	NEG	NA
J0121310_1504	J0121310	FALSE	2015-04	Fingerprick	NEG	NA
J0121310_1511	J0121310	FALSE	2015-11	Fingerprick	NEG	NA
J0121310_1512	J0121310	FALSE	2015-12	Fingerprick	NEG	NA
J0121310_1603	J0121310	FALSE	2016-03	Fingerprick	NEG	NA
J0121310_1607	J0121310	FALSE	2016-07	Fingerprick	NEG	NA
J0121310_1612	J0121310	FALSE	2016-12	Fingerprick	NEG	NA
J0121311_1412	J0121311	FALSE	2014-12	Fingerprick	NEG	NA
J0121311_1504	J0121311	FALSE	2015-04	Fingerprick	NEG	NA
J0121311_1603	J0121311	FALSE	2016-03	Fingerprick	NEG	NA
J0121312_1504	J0121312	FALSE	2015-04	Fingerprick	NEG	NA
J0121312_1603	J0121312	FALSE	2016-03	Fingerprick	NEG	NA
J0121313_1412	J0121313	FALSE	2014-12	Fingerprick	NEG	NA
J0121313_1504	J0121313	FALSE	2015-04	Fingerprick	NEG	NA
J0121317_1412	J0121317	FALSE	2014-12	Fingerprick	NEG	NA
J0121317_1512	J0121317	FALSE	2015-12	Fingerprick	NEG	NA
J0121317_1612	J0121317	FALSE	2016-12	Fingerprick	NEG	NA
J0121318_1412	J0121318	FALSE	2014-12	Fingerprick	NEG	NA
J0121319_1504	J0121319	FALSE	2015-04	Fingerprick	NEG	NA
J0121319_1512	J0121319	FALSE	2015-12	Fingerprick	NEG	NA
J0121319_1612	J0121319	FALSE	2016-12	Fingerprick	NEG	NA
J0131401_1504	J0131401	FALSE	2015-04	Fingerprick	NEG	NA
J0131401_1511	J0131401	FALSE	2015-11	Fingerprick	NEG	NA
J0131401_1603	J0131401	FALSE	2016-03	Fingerprick	NEG	NA
J0131401_1610	J0131401	FALSE	2016-10	Fingerprick	NEG	NA
J0131401_1611	J0131401	FALSE	2016-11	Fingerprick	NEG	NA
J0131401_1612	J0131401	FALSE	2016-12	Fingerprick	NEG	NA
J0131402_1412	J0131402	FALSE	2014-12	Fingerprick	NEG	NA
J0131402_1504	J0131402	FALSE	2015-04	Fingerprick	NEG	NA
J0131402_1511	J0131402	FALSE	2015-11	Fingerprick	NEG	NA
J0131402_1512	J0131402	FALSE	2015-12	Fingerprick	NEG	NA
J0131402_1603	J0131402	FALSE	2016-03	Fingerprick	NEG	NA
J0131402_1610	J0131402	FALSE	2016-10	Fingerprick	NEG	NA
J0131402_1611	J0131402	FALSE	2016-11	Fingerprick	NEG	NA
J0131402_1612	J0131402	FALSE	2016-12	Fingerprick	NEG	NA
J0131403_1412	J0131403	FALSE	2014-12	Fingerprick	NEG	NA
J0131403_1511	J0131403	FALSE	2015-11	Fingerprick	POS	NA
J0131403_1512	J0131403	FALSE	2015-12	Fingerprick	NEG	NA
J0131403_1603	J0131403	FALSE	2016-03	Fingerprick	NEG	NA
J0131403_1607	J0131403	FALSE	2016-07	Fingerprick	NEG	NA
J0131403_1610	J0131403	FALSE	2016-10	Fingerprick	NEG	NA
J0131403_1611	J0131403	FALSE	2016-11	Fingerprick	NEG	NA
J0131403_1612	J0131403	FALSE	2016-12	Fingerprick	NEG	NA
J0131404_1412	J0131404	FALSE	2014-12	Fingerprick	NEG	NA
J0131404_1511	J0131404	FALSE	2015-11	Fingerprick	POS	NA
J0131404_1512	J0131404	FALSE	2015-12	Fingerprick	NEG	NA
J0131404_1603	J0131404	FALSE	2016-03	Fingerprick	NEG	NA
J0131404_1610	J0131404	FALSE	2016-10	Fingerprick	NEG	NA
J0131404_1611	J0131404	FALSE	2016-11	Fingerprick	NEG	NA
J0131404_1612	J0131404	FALSE	2016-12	Fingerprick	NEG	NA
J0131405_1612	J0131405	FALSE	2016-12	Fingerprick	NEG	NA
J0131406_1512	J0131406	FALSE	2015-12	Fingerprick	POS	NA
J0131406_1603	J0131406	FALSE	2016-03	Fingerprick	NEG	NA
J0131406_1605	J0131406	FALSE	2016-05	Fingerprick	NEG	NA
J0131406_1610	J0131406	FALSE	2016-10	Fingerprick	NEG	NA
J0131406_1612	J0131406	FALSE	2016-12	Fingerprick	NEG	NA
J0141501_1412	J0141501	FALSE	2014-12	Fingerprick	NEG	NA
J0141502_1412	J0141502	FALSE	2014-12	Fingerprick	NEG	NA
J0141502_1511	J0141502	FALSE	2015-11	Fingerprick	NEG	NA
J0141502_1603	J0141502	FALSE	2016-03	Fingerprick	NEG	NA
J0141503_1412	J0141503	FALSE	2014-12	Fingerprick	NEG	NA
J0141503_1511	J0141503	FALSE	2015-11	Fingerprick	POS	NA
J0141503_1603	J0141503	FALSE	2016-03	Fingerprick	NEG	NA
J0141503_1605	J0141503	FALSE	2016-05	Fingerprick	NEG	NA
J0141504_1412	J0141504	FALSE	2014-12	Fingerprick	NEG	NA
J0141504_1511	J0141504	FALSE	2015-11	Fingerprick	NEG	NA
J0141504_1603	J0141504	FALSE	2016-03	Fingerprick	NEG	NA
J0141505_1412	J0141505	FALSE	2014-12	Fingerprick	NEG	NA
J0141505_1511	J0141505	FALSE	2015-11	Fingerprick	NEG	NA
J0141505_1512	J0141505	FALSE	2015-12	Fingerprick	NEG	NA
J0141506_1412	J0141506	FALSE	2014-12	Fingerprick	POS	NA
J0141506_1506	J0141506	FALSE	2015-06	Fingerprick	POS	NA
J0141506_1511	J0141506	FALSE	2015-11	Fingerprick	POS	NA
J0141506_1605	J0141506	FALSE	2016-05	Fingerprick	NEG	NA
J0141507_1412	J0141507	FALSE	2014-12	Fingerprick	NEG	NA
J0141507_1511	J0141507	FALSE	2015-11	Fingerprick	NEG	NA
J0141507_1612	J0141507	FALSE	2016-12	Fingerprick	NEG	NA
J0141508_1412	J0141508	FALSE	2014-12	Fingerprick	NEG	NA
J0141508_1511	J0141508	FALSE	2015-11	Fingerprick	NEG	NA
J0141508_1612	J0141508	FALSE	2016-12	Fingerprick	NEG	NA
J0141509_1412	J0141509	FALSE	2014-12	Fingerprick	POS	NA
J0141509_1512	J0141509	FALSE	2015-12	Fingerprick	NEG	NA
J0141509_1603	J0141509	FALSE	2016-03	Fingerprick	NEG	NA
J0141509_1612	J0141509	FALSE	2016-12	Fingerprick	NEG	NA
J0141510_1412	J0141510	FALSE	2014-12	Fingerprick	NEG	NA
J0141510_1511	J0141510	FALSE	2015-11	Fingerprick	NEG	NA
J0141510_1603	J0141510	FALSE	2016-03	Fingerprick	NEG	NA
J0141511_1412	J0141511	FALSE	2014-12	Fingerprick	NEG	NA
J0141511_1603	J0141511	FALSE	2016-03	Fingerprick	NEG	NA
J0141511_1612	J0141511	FALSE	2016-12	Fingerprick	NEG	NA
J0141512_1504	J0141512	FALSE	2015-04	Fingerprick	NEG	NA
J0141512_1511	J0141512	FALSE	2015-11	Fingerprick	NEG	NA
J0141512_1603	J0141512	FALSE	2016-03	Fingerprick	NEG	NA
J0141512_1612	J0141512	FALSE	2016-12	Fingerprick	NEG	NA
J0141513_1412	J0141513	FALSE	2014-12	Fingerprick	NEG	NA
J0141513_1504	J0141513	FALSE	2015-04	Fingerprick	NEG	NA
J0141513_1603	J0141513	FALSE	2016-03	Fingerprick	NEG	NA
J0141513_1612	J0141513	FALSE	2016-12	Fingerprick	NEG	NA
J0141514_1412	J0141514	FALSE	2014-12	Fingerprick	NEG	NA
J0141514_1504	J0141514	FALSE	2015-04	Fingerprick	NEG	NA
J0141514_1511	J0141514	FALSE	2015-11	Fingerprick	NEG	NA
J0141514_1512	J0141514	FALSE	2015-12	Fingerprick	NEG	NA
J0141514_1603	J0141514	FALSE	2016-03	Fingerprick	NEG	NA
J0141514_1612	J0141514	FALSE	2016-12	Fingerprick	NEG	NA
J0141515_1603	J0141515	FALSE	2016-03	Fingerprick	NEG	NA
J0141515_1612	J0141515	FALSE	2016-12	Fingerprick	NEG	NA
J0141516_1603	J0141516	FALSE	2016-03	Fingerprick	NEG	NA
J0151601_1412	J0151601	FALSE	2014-12	Fingerprick	NEG	NA
J0151601_1610	J0151601	FALSE	2016-10	Fingerprick	NEG	NA
J0151602_1412	J0151602	FALSE	2014-12	Fingerprick	NEG	NA
J0151602_1511	J0151602	FALSE	2015-11	Fingerprick	NEG	NA
J0151602_1603	J0151602	FALSE	2016-03	Fingerprick	NEG	NA
J0151602_1610	J0151602	FALSE	2016-10	Fingerprick	NEG	NA
J0151602_1611	J0151602	FALSE	2016-11	Fingerprick	NEG	NA
J0151602_1612	J0151602	FALSE	2016-12	Fingerprick	NEG	NA
J0151603_1412	J0151603	FALSE	2014-12	Fingerprick	NEG	NA
J0151603_1504	J0151603	FALSE	2015-04	Fingerprick	NEG	NA
J0151603_1511	J0151603	FALSE	2015-11	Fingerprick	NEG	NA
J0151603_1512	J0151603	FALSE	2015-12	Fingerprick	NEG	NA
J0151603_1603	J0151603	FALSE	2016-03	Fingerprick	NEG	NA
J0151603_1611	J0151603	FALSE	2016-11	Fingerprick	NEG	NA
J0151604_1506	J0151604	FALSE	2015-06	Fingerprick	NEG	NA
J0151604_1511	J0151604	FALSE	2015-11	Fingerprick	NEG	NA
J0151605_1412	J0151605	FALSE	2014-12	Fingerprick	NEG	NA
J0151605_1511	J0151605	FALSE	2015-11	Fingerprick	NEG	NA
J0151605_1512	J0151605	FALSE	2015-12	Fingerprick	NEG	NA
J0151605_1603	J0151605	FALSE	2016-03	Fingerprick	NEG	NA
J0151605_1610	J0151605	FALSE	2016-10	Fingerprick	NEG	NA
J0151605_1611	J0151605	FALSE	2016-11	Fingerprick	NEG	NA
J0151605_1612	J0151605	FALSE	2016-12	Fingerprick	NEG	NA
J0151606_1412	J0151606	FALSE	2014-12	Fingerprick	NEG	NA
J0151606_1504	J0151606	FALSE	2015-04	Fingerprick	NEG	NA
J0151606_1511	J0151606	FALSE	2015-11	Fingerprick	NEG	NA
J0151606_1512	J0151606	FALSE	2015-12	Fingerprick	NEG	NA
J0151606_1603	J0151606	FALSE	2016-03	Fingerprick	NEG	NA
J0151606_1607	J0151606	FALSE	2016-07	Fingerprick	NEG	NA
J0151606_1610	J0151606	FALSE	2016-10	Fingerprick	NEG	NA
J0151606_1611	J0151606	FALSE	2016-11	Fingerprick	NEG	NA
J0151606_1612	J0151606	FALSE	2016-12	Fingerprick	NEG	NA
J0151607_1412	J0151607	FALSE	2014-12	Fingerprick	NEG	NA
J0151607_1504	J0151607	FALSE	2015-04	Fingerprick	NEG	NA
J0151607_1511	J0151607	FALSE	2015-11	Fingerprick	NEG	NA
J0151607_1512	J0151607	FALSE	2015-12	Fingerprick	NEG	NA
J0151607_1603	J0151607	FALSE	2016-03	Fingerprick	NEG	NA
J0151607_1610	J0151607	FALSE	2016-10	Fingerprick	NEG	NA
J0151607_1611	J0151607	FALSE	2016-11	Fingerprick	NEG	NA
J0151607_1612	J0151607	FALSE	2016-12	Fingerprick	NEG	NA
J0151608_1412	J0151608	FALSE	2014-12	Fingerprick	NEG	NA
J0151608_1504	J0151608	FALSE	2015-04	Fingerprick	NEG	NA
J0151608_1511	J0151608	FALSE	2015-11	Fingerprick	NEG	NA
J0151608_1512	J0151608	FALSE	2015-12	Fingerprick	NEG	NA
J0151608_1610	J0151608	FALSE	2016-10	Fingerprick	NEG	NA
J0151608_1611	J0151608	FALSE	2016-11	Fingerprick	NEG	NA
J0151608_1612	J0151608	TRUE	2016-12	Fingerprick	POS	NA
J0151608_1701	J0151608	TRUE	2017-01	Venous blood	POS	NA
J0151608_1703	J0151608	TRUE	2017-03	Fingerprick	POS	NA
J0151608_1704	J0151608	TRUE	2017-04	Fingerprick	POS	NA
J0151609_1512	J0151609	FALSE	2015-12	Fingerprick	POS	NA
J0151609_1603	J0151609	FALSE	2016-03	Fingerprick	NEG	NA
J0151609_1605	J0151609	FALSE	2016-05	Fingerprick	NEG	NA
J0151609_1610	J0151609	FALSE	2016-10	Fingerprick	NEG	NA
J0151609_1611	J0151609	FALSE	2016-11	Fingerprick	NEG	NA
J0151609_1612	J0151609	FALSE	2016-12	Fingerprick	NEG	NA
J0151610_1412	J0151610	FALSE	2014-12	Fingerprick	NEG	NA
J0151610_1511	J0151610	FALSE	2015-11	Fingerprick	NEG	NA
J0151610_1512	J0151610	FALSE	2015-12	Fingerprick	NEG	NA
J0151610_1603	J0151610	FALSE	2016-03	Fingerprick	NEG	NA
J0151610_1611	J0151610	FALSE	2016-11	Fingerprick	NEG	NA
J0151612_1412	J0151612	FALSE	2014-12	Fingerprick	NEG	NA
J0151612_1504	J0151612	FALSE	2015-04	Fingerprick	NEG	NA
J0151612_1511	J0151612	FALSE	2015-11	Fingerprick	POS	NA
J0151612_1512	J0151612	FALSE	2015-12	Fingerprick	NEG	NA
J0151612_1603	J0151612	FALSE	2016-03	Fingerprick	NEG	NA
J0151612_1610	J0151612	FALSE	2016-10	Fingerprick	NEG	2016-10
J0151612_1611	J0151612	FALSE	2016-11	Fingerprick	POS	NA
J0151612_1612	J0151612	FALSE	2016-12	Fingerprick	NEG	NA
J0151613_1504	J0151613	FALSE	2015-04	Fingerprick	NEG	NA
J0151613_1512	J0151613	FALSE	2015-12	Fingerprick	NEG	NA
J0151613_1603	J0151613	FALSE	2016-03	Fingerprick	NEG	NA
J0151613_1610	J0151613	FALSE	2016-10	Fingerprick	NEG	NA
J0151613_1612	J0151613	FALSE	2016-12	Fingerprick	NEG	NA
J0151614_1412	J0151614	FALSE	2014-12	Fingerprick	NEG	NA
J0151614_1504	J0151614	FALSE	2015-04	Fingerprick	NEG	NA
J0151614_1603	J0151614	FALSE	2016-03	Fingerprick	NEG	NA
J0151614_1612	J0151614	FALSE	2016-12	Fingerprick	NEG	NA
J0151615_1412	J0151615	FALSE	2014-12	Fingerprick	NEG	NA
J0151615_1610	J0151615	FALSE	2016-10	Fingerprick	NEG	NA
J0151615_1611	J0151615	FALSE	2016-11	Fingerprick	NEG	NA
J0151615_1612	J0151615	FALSE	2016-12	Fingerprick	NEG	NA
J0151616_1412	J0151616	FALSE	2014-12	Fingerprick	POS	NA
J0151616_1511	J0151616	FALSE	2015-11	Fingerprick	NEG	NA
J0151616_1512	J0151616	FALSE	2015-12	Fingerprick	NEG	NA
J0151616_1603	J0151616	FALSE	2016-03	Fingerprick	NEG	NA
J0151616_1611	J0151616	FALSE	2016-11	Fingerprick	POS	2016-11
J0151616_1612	J0151616	FALSE	2016-12	Fingerprick	NEG	NA
J0151617_1504	J0151617	FALSE	2015-04	Fingerprick	NEG	NA
J0151617_1512	J0151617	FALSE	2015-12	Fingerprick	NEG	NA
J0151617_1603	J0151617	FALSE	2016-03	Fingerprick	NEG	NA
J0161701_1412	J0161701	FALSE	2014-12	Fingerprick	NEG	NA
J0161702_1504	J0161702	FALSE	2015-04	Fingerprick	NEG	NA
J0161702_1603	J0161702	FALSE	2016-03	Fingerprick	POS	NA
J0161703_1412	J0161703	FALSE	2014-12	Fingerprick	NEG	NA
J0161704_1412	J0161704	FALSE	2014-12	Fingerprick	NEG	NA
J0161705_1412	J0161705	FALSE	2014-12	Fingerprick	NEG	NA
J0161705_1511	J0161705	FALSE	2015-11	Fingerprick	NEG	NA
J0161705_1512	J0161705	FALSE	2015-12	Fingerprick	NEG	NA
J0161706_1412	J0161706	FALSE	2014-12	Fingerprick	NEG	NA
J0161706_1603	J0161706	FALSE	2016-03	Fingerprick	NEG	NA
J0161707_1412	J0161707	FALSE	2014-12	Fingerprick	NEG	NA
J0161707_1603	J0161707	FALSE	2016-03	Fingerprick	NEG	NA
J0161708_1412	J0161708	FALSE	2014-12	Fingerprick	POS	NA
J0161709_1412	J0161709	FALSE	2014-12	Fingerprick	NEG	NA
J0161710_1412	J0161710	FALSE	2014-12	Fingerprick	POS	NA
J0161710_1504	J0161710	FALSE	2015-04	Fingerprick	NEG	NA
J0161711_1412	J0161711	FALSE	2014-12	Fingerprick	NEG	NA
J0161711_1603	J0161711	FALSE	2016-03	Fingerprick	POS	NA
J0161713_1603	J0161713	FALSE	2016-03	Fingerprick	NEG	NA
J0171801_1610	J0171801	FALSE	2016-10	Fingerprick	NEG	NA
J0171801_1612	J0171801	FALSE	2016-12	Fingerprick	NEG	NA
J0171802_1412	J0171802	FALSE	2014-12	Fingerprick	NEG	NA
J0171802_1511	J0171802	FALSE	2015-11	Fingerprick	NEG	NA
J0171802_1603	J0171802	FALSE	2016-03	Fingerprick	NEG	NA
J0171802_1611	J0171802	FALSE	2016-11	Venous blood	POS	2016-11
J0171803_1412	J0171803	FALSE	2014-12	Fingerprick	NEG	NA
J0171803_1506	J0171803	FALSE	2015-06	Fingerprick	NEG	NA
J0171803_1511	J0171803	FALSE	2015-11	Fingerprick	POS	NA
J0171803_1603	J0171803	FALSE	2016-03	Fingerprick	NEG	NA
J0171803_1605	J0171803	FALSE	2016-05	Fingerprick	NEG	NA
J0171803_1610	J0171803	FALSE	2016-10	Fingerprick	NEG	2016-10
J0171803_1611	J0171803	FALSE	2016-11	Venous blood	POS	NA
J0171803_1612	J0171803	FALSE	2016-12	Fingerprick	NEG	NA
J0171804_1412	J0171804	FALSE	2014-12	Fingerprick	POS	NA
J0171804_1504	J0171804	FALSE	2015-04	Fingerprick	NEG	NA
J0171804_1511	J0171804	FALSE	2015-11	Fingerprick	NEG	NA
J0171804_1512	J0171804	FALSE	2015-12	Fingerprick	NEG	NA
J0171804_1603	J0171804	FALSE	2016-03	Fingerprick	NEG	NA
J0171804_1607	J0171804	FALSE	2016-07	Fingerprick	NEG	2016-07
J0171804_1610	J0171804	FALSE	2016-10	Venous blood	POS	2016-10
J0171804_1611	J0171804	FALSE	2016-11	Fingerprick	POS	2016-11
J0171804_1612	J0171804	FALSE	2016-12	Fingerprick	NEG	NA
J0171805_1412	J0171805	FALSE	2014-12	Fingerprick	NEG	NA
J0171805_1504	J0171805	FALSE	2015-04	Fingerprick	NEG	NA
J0171805_1511	J0171805	FALSE	2015-11	Fingerprick	NEG	NA
J0171805_1603	J0171805	FALSE	2016-03	Fingerprick	NEG	NA
J0171805_1610	J0171805	FALSE	2016-10	Fingerprick	NEG	NA
J0171805_1611	J0171805	FALSE	2016-11	Venous blood	POS	NA
J0171805_1612	J0171805	FALSE	2016-12	Fingerprick	NEG	NA
J0171806_1412	J0171806	FALSE	2014-12	Fingerprick	NEG	NA
J0171806_1504	J0171806	FALSE	2015-04	Fingerprick	NEG	NA
J0171806_1511	J0171806	FALSE	2015-11	Fingerprick	POS	NA
J0171806_1603	J0171806	FALSE	2016-03	Fingerprick	NEG	NA
J0181901_1412	J0181901	FALSE	2014-12	Fingerprick	NEG	NA
J0181901_1511	J0181901	FALSE	2015-11	Fingerprick	NEG	NA
J0181901_1512	J0181901	FALSE	2015-12	Fingerprick	NEG	NA
J0181901_1612	J0181901	FALSE	2016-12	Fingerprick	NEG	NA
J0181902_1412	J0181902	FALSE	2014-12	Fingerprick	NEG	NA
J0181902_1506	J0181902	FALSE	2015-06	Fingerprick	NEG	NA
J0181902_1612	J0181902	FALSE	2016-12	Fingerprick	NEG	NA
J0181903_1412	J0181903	FALSE	2014-12	Fingerprick	NEG	NA
J0181903_1504	J0181903	FALSE	2015-04	Fingerprick	NEG	NA
J0181903_1511	J0181903	FALSE	2015-11	Fingerprick	NEG	NA
J0181903_1512	J0181903	FALSE	2015-12	Fingerprick	NEG	NA
J0181903_1612	J0181903	FALSE	2016-12	Fingerprick	NEG	NA
J0181904_1412	J0181904	FALSE	2014-12	Fingerprick	NEG	NA
J0181904_1504	J0181904	FALSE	2015-04	Fingerprick	NEG	NA
J0181905_1412	J0181905	FALSE	2014-12	Fingerprick	NEG	NA
J0181905_1504	J0181905	FALSE	2015-04	Fingerprick	NEG	NA
J0181905_1511	J0181905	FALSE	2015-11	Fingerprick	NEG	NA
J0181905_1512	J0181905	FALSE	2015-12	Fingerprick	NEG	NA
J0181905_1603	J0181905	FALSE	2016-03	Fingerprick	NEG	NA
J0181905_1612	J0181905	FALSE	2016-12	Fingerprick	NEG	NA
J0181906_1412	J0181906	FALSE	2014-12	Fingerprick	NEG	NA
J0181906_1506	J0181906	FALSE	2015-06	Fingerprick	NEG	NA
J0181906_1511	J0181906	FALSE	2015-11	Fingerprick	NEG	NA
J0181906_1512	J0181906	FALSE	2015-12	Fingerprick	NEG	NA
J0181906_1603	J0181906	FALSE	2016-03	Fingerprick	NEG	NA
J0181906_1607	J0181906	FALSE	2016-07	Fingerprick	NEG	NA
J0181906_1612	J0181906	FALSE	2016-12	Fingerprick	NEG	NA
J0181907_1412	J0181907	FALSE	2014-12	Fingerprick	POS	NA
J0181907_1511	J0181907	FALSE	2015-11	Fingerprick	NEG	NA
J0181907_1512	J0181907	FALSE	2015-12	Fingerprick	NEG	NA
J0181907_1603	J0181907	FALSE	2016-03	Fingerprick	NEG	NA
J0181908_1506	J0181908	FALSE	2015-06	Fingerprick	NEG	NA
J0181908_1511	J0181908	FALSE	2015-11	Fingerprick	NEG	NA
J0181908_1512	J0181908	FALSE	2015-12	Fingerprick	NEG	NA
J0181908_1603	J0181908	FALSE	2016-03	Fingerprick	NEG	NA
J0181908_1612	J0181908	FALSE	2016-12	Fingerprick	NEG	NA
J0181909_1412	J0181909	FALSE	2014-12	Fingerprick	NEG	NA
J0181909_1511	J0181909	FALSE	2015-11	Fingerprick	NEG	NA
J0181910_1506	J0181910	FALSE	2015-06	Fingerprick	NEG	NA
J0181910_1511	J0181910	FALSE	2015-11	Fingerprick	POS	NA
J0181910_1603	J0181910	FALSE	2016-03	Fingerprick	NEG	NA
J0181910_1605	J0181910	FALSE	2016-05	Fingerprick	NEG	NA
J0181911_1412	J0181911	FALSE	2014-12	Fingerprick	NEG	NA
J0181911_1504	J0181911	FALSE	2015-04	Fingerprick	NEG	NA
J0181911_1511	J0181911	FALSE	2015-11	Fingerprick	NEG	NA
J0181911_1512	J0181911	FALSE	2015-12	Fingerprick	NEG	NA
J0181911_1603	J0181911	FALSE	2016-03	Fingerprick	NEG	NA
J0181911_1607	J0181911	FALSE	2016-07	Fingerprick	POS	NA
J0181911_1611	J0181911	FALSE	2016-11	Venous blood	POS	2016-11
J0181911_1612	J0181911	FALSE	2016-12	Fingerprick	NEG	NA
J0181912_1412	J0181912	FALSE	2014-12	Fingerprick	POS	NA
J0181912_1504	J0181912	FALSE	2015-04	Fingerprick	NEG	NA
J0181912_1511	J0181912	FALSE	2015-11	Fingerprick	NEG	NA
J0181912_1512	J0181912	FALSE	2015-12	Fingerprick	NEG	NA
J0181912_1603	J0181912	FALSE	2016-03	Fingerprick	NEG	NA
J0181912_1612	J0181912	FALSE	2016-12	Fingerprick	NEG	NA
J0192001_1412	J0192001	FALSE	2014-12	Fingerprick	NEG	NA
J0202101_1412	J0202101	FALSE	2014-12	Fingerprick	NEG	NA
J0202101_1506	J0202101	FALSE	2015-06	Fingerprick	NEG	NA
J0202102_1412	J0202102	FALSE	2014-12	Fingerprick	NEG	NA
J0202102_1511	J0202102	FALSE	2015-11	Fingerprick	NEG	NA
J0202102_1607	J0202102	FALSE	2016-07	Fingerprick	NEG	NA
J0202102_1612	J0202102	FALSE	2016-12	Fingerprick	NEG	NA
J0202103_1412	J0202103	FALSE	2014-12	Fingerprick	NEG	NA
J0202104_1412	J0202104	FALSE	2014-12	Fingerprick	NA	NA
J0202104_1603	J0202104	FALSE	2016-03	Fingerprick	NEG	NA
J0202104_1607	J0202104	FALSE	2016-07	Fingerprick	NEG	NA
J0202104_1612	J0202104	FALSE	2016-12	Fingerprick	NEG	NA
J0202105_1612	J0202105	FALSE	2016-12	Fingerprick	NEG	NA
J0202106_1603	J0202106	FALSE	2016-03	Fingerprick	NEG	NA
J0202106_1612	J0202106	FALSE	2016-12	Fingerprick	NEG	NA
J0202107_1412	J0202107	FALSE	2014-12	Fingerprick	POS	NA
J0202107_1603	J0202107	FALSE	2016-03	Fingerprick	NEG	NA
J0202107_1607	J0202107	FALSE	2016-07	Fingerprick	NEG	NA
J0202110_1504	J0202110	FALSE	2015-04	Fingerprick	NEG	NA
J0202111_1412	J0202111	FALSE	2014-12	Fingerprick	NEG	NA
J0202111_1511	J0202111	FALSE	2015-11	Fingerprick	NEG	NA
J0202111_1603	J0202111	FALSE	2016-03	Fingerprick	NEG	NA
J0202111_1607	J0202111	FALSE	2016-07	Fingerprick	NEG	NA
J0202111_1612	J0202111	FALSE	2016-12	Fingerprick	NEG	NA
J0202113_1412	J0202113	FALSE	2014-12	Fingerprick	NEG	NA
J0202113_1511	J0202113	FALSE	2015-11	Fingerprick	NEG	NA
J0212201_1504	J0212201	FALSE	2015-04	Fingerprick	NEG	NA
J0212201_1511	J0212201	FALSE	2015-11	Fingerprick	NEG	NA
J0212201_1603	J0212201	FALSE	2016-03	Fingerprick	NEG	NA
J0212201_1611	J0212201	FALSE	2016-11	Fingerprick	NEG	NA
J0212201_1612	J0212201	FALSE	2016-12	Fingerprick	NEG	NA
J0212203_1412	J0212203	FALSE	2014-12	Fingerprick	POS	NA
J0212204_1412	J0212204	FALSE	2014-12	Fingerprick	NA	NA
J0212204_1504	J0212204	FALSE	2015-04	Fingerprick	NEG	NA
J0212204_1511	J0212204	FALSE	2015-11	Fingerprick	NEG	NA
J0212204_1603	J0212204	FALSE	2016-03	Fingerprick	NEG	NA
J0212204_1611	J0212204	FALSE	2016-11	Fingerprick	NEG	NA
J0212204_1612	J0212204	FALSE	2016-12	Fingerprick	NEG	NA
J0212205_1412	J0212205	FALSE	2014-12	Fingerprick	NEG	NA
J0212205_1506	J0212205	FALSE	2015-06	Fingerprick	NEG	NA
J0212205_1607	J0212205	FALSE	2016-07	Fingerprick	NEG	NA
J0212205_1612	J0212205	FALSE	2016-12	Fingerprick	NEG	NA
J0222301_1412	J0222301	FALSE	2014-12	Fingerprick	NEG	NA
J0222301_1506	J0222301	FALSE	2015-06	Fingerprick	NEG	NA
J0222301_1511	J0222301	FALSE	2015-11	Fingerprick	POS	NA
J0222301_1512	J0222301	FALSE	2015-12	Fingerprick	NEG	NA
J0222301_1605	J0222301	FALSE	2016-05	Fingerprick	NEG	NA
J0222301_1612	J0222301	FALSE	2016-12	Fingerprick	NEG	NA
J0222302_1412	J0222302	FALSE	2014-12	Fingerprick	NEG	NA
J0222302_1504	J0222302	FALSE	2015-04	Fingerprick	NEG	NA
J0222302_1506	J0222302	FALSE	2015-06	Fingerprick	NEG	NA
J0222302_1603	J0222302	FALSE	2016-03	Fingerprick	NEG	NA
J0222302_1607	J0222302	FALSE	2016-07	Fingerprick	POS	NA
J0222302_1612	J0222302	TRUE	2016-12	Fingerprick	POS	NA
J0222302_1701	J0222302	TRUE	2017-01	Venous blood	POS	NA
J0222303_1412	J0222303	FALSE	2014-12	Fingerprick	NEG	NA
J0222303_1511	J0222303	FALSE	2015-11	Fingerprick	NEG	NA
J0222303_1512	J0222303	FALSE	2015-12	Fingerprick	NEG	NA
J0222303_1603	J0222303	FALSE	2016-03	Fingerprick	NEG	NA
J0222303_1612	J0222303	FALSE	2016-12	Fingerprick	NEG	NA
J0222304_1412	J0222304	FALSE	2014-12	Fingerprick	NEG	NA
J0222304_1504	J0222304	FALSE	2015-04	Fingerprick	NEG	NA
J0222304_1511	J0222304	FALSE	2015-11	Fingerprick	NEG	NA
J0222304_1512	J0222304	FALSE	2015-12	Fingerprick	NEG	NA
J0222304_1607	J0222304	FALSE	2016-07	Fingerprick	NEG	NA
J0222304_1612	J0222304	FALSE	2016-12	Fingerprick	NEG	NA
J0222305_1412	J0222305	FALSE	2014-12	Fingerprick	NEG	NA
J0222305_1504	J0222305	FALSE	2015-04	Fingerprick	NEG	NA
J0222305_1511	J0222305	FALSE	2015-11	Fingerprick	NEG	NA
J0222305_1603	J0222305	FALSE	2016-03	Fingerprick	NEG	NA
J0222305_1607	J0222305	FALSE	2016-07	Fingerprick	NEG	NA
J0222305_1612	J0222305	FALSE	2016-12	Fingerprick	NEG	NA
J0222306_1412	J0222306	FALSE	2014-12	Fingerprick	POS	NA
J0222306_1504	J0222306	FALSE	2015-04	Fingerprick	NEG	NA
J0222306_1506	J0222306	FALSE	2015-06	Fingerprick	NEG	NA
J0222306_1603	J0222306	FALSE	2016-03	Fingerprick	NEG	NA
J0232401_1506	J0232401	FALSE	2015-06	Fingerprick	NEG	NA
J0232401_1511	J0232401	FALSE	2015-11	Fingerprick	NEG	NA
J0232401_1512	J0232401	FALSE	2015-12	Fingerprick	NEG	NA
J0232401_1612	J0232401	FALSE	2016-12	Fingerprick	POS	NA
J0232402_1504	J0232402	FALSE	2015-04	Fingerprick	NEG	NA
J0232403_1412	J0232403	FALSE	2014-12	Fingerprick	NEG	NA
J0232403_1504	J0232403	FALSE	2015-04	Fingerprick	NEG	NA
J0232403_1511	J0232403	FALSE	2015-11	Fingerprick	NEG	NA
J0232403_1512	J0232403	FALSE	2015-12	Fingerprick	NEG	NA
J0232403_1603	J0232403	FALSE	2016-03	Fingerprick	NEG	NA
J0232403_1607	J0232403	FALSE	2016-07	Fingerprick	NEG	NA
J0232403_1610	J0232403	FALSE	2016-10	Fingerprick	NEG	NA
J0232403_1611	J0232403	FALSE	2016-11	Fingerprick	NEG	NA
J0232403_1612	J0232403	FALSE	2016-12	Fingerprick	NEG	NA
J0232404_1506	J0232404	FALSE	2015-06	Fingerprick	NEG	NA
J0232404_1511	J0232404	FALSE	2015-11	Fingerprick	POS	NA
J0232404_1512	J0232404	FALSE	2015-12	Fingerprick	NEG	NA
J0232404_1603	J0232404	FALSE	2016-03	Fingerprick	NEG	NA
J0232404_1607	J0232404	FALSE	2016-07	Fingerprick	NEG	NA
J0232404_1610	J0232404	FALSE	2016-10	Fingerprick	NEG	NA
J0232404_1611	J0232404	FALSE	2016-11	Fingerprick	POS	2016-11
J0232404_1612	J0232404	FALSE	2016-12	Fingerprick	NEG	NA
J0232405_1504	J0232405	FALSE	2015-04	Fingerprick	NEG	NA
J0232405_1511	J0232405	FALSE	2015-11	Fingerprick	NEG	NA
J0232405_1512	J0232405	FALSE	2015-12	Fingerprick	NEG	NA
J0232405_1603	J0232405	FALSE	2016-03	Fingerprick	NEG	NA
J0232405_1607	J0232405	FALSE	2016-07	Fingerprick	NEG	NA
J0232405_1610	J0232405	FALSE	2016-10	Fingerprick	NEG	NA
J0232405_1611	J0232405	FALSE	2016-11	Fingerprick	NEG	NA
J0232405_1612	J0232405	FALSE	2016-12	Fingerprick	NEG	NA
J0232406_1603	J0232406	FALSE	2016-03	Fingerprick	NEG	NA
J0232408_1504	J0232408	FALSE	2015-04	Fingerprick	NEG	NA
J0232408_1603	J0232408	FALSE	2016-03	Fingerprick	NEG	NA
J0232410_1511	J0232410	FALSE	2015-11	Fingerprick	POS	NA
J0232411_1412	J0232411	FALSE	2014-12	Fingerprick	NEG	NA
J0232411_1512	J0232411	FALSE	2015-12	Fingerprick	NEG	NA
J0232411_1603	J0232411	FALSE	2016-03	Fingerprick	NEG	NA
J0232414_1512	J0232414	FALSE	2015-12	Fingerprick	NEG	NA
J0232414_1603	J0232414	FALSE	2016-03	Fingerprick	NEG	NA
J0232414_1607	J0232414	FALSE	2016-07	Fingerprick	NEG	NA
J0232414_1610	J0232414	FALSE	2016-10	Fingerprick	NEG	NA
J0232414_1611	J0232414	FALSE	2016-11	Fingerprick	NEG	NA
J0232414_1612	J0232414	FALSE	2016-12	Fingerprick	NEG	NA
J0242501_1504	J0242501	FALSE	2015-04	Fingerprick	NEG	NA
J0242501_1511	J0242501	FALSE	2015-11	Fingerprick	NEG	NA
J0242501_1603	J0242501	FALSE	2016-03	Fingerprick	NEG	NA
J0242502_1504	J0242502	FALSE	2015-04	Fingerprick	NEG	NA
J0242502_1512	J0242502	FALSE	2015-12	Fingerprick	NEG	NA
J0242502_1605	J0242502	FALSE	2016-05	Fingerprick	NEG	NA
J0242505_1506	J0242505	FALSE	2015-06	Fingerprick	NEG	NA
J0242505_1511	J0242505	FALSE	2015-11	Fingerprick	NEG	NA
J0242505_1512	J0242505	FALSE	2015-12	Fingerprick	NEG	NA
J0242505_1603	J0242505	FALSE	2016-03	Fingerprick	NEG	NA
J0242505_1612	J0242505	FALSE	2016-12	Fingerprick	NEG	NA
J0242506_1504	J0242506	FALSE	2015-04	Fingerprick	NEG	NA
J0242506_1511	J0242506	FALSE	2015-11	Fingerprick	NEG	NA
J0242506_1512	J0242506	FALSE	2015-12	Fingerprick	NEG	NA
J0242506_1607	J0242506	FALSE	2016-07	Fingerprick	NEG	NA
J0242506_1612	J0242506	FALSE	2016-12	Fingerprick	NEG	NA
J0242507_1412	J0242507	FALSE	2014-12	Fingerprick	NEG	NA
J0242507_1504	J0242507	FALSE	2015-04	Fingerprick	NEG	NA
J0242508_1511	J0242508	FALSE	2015-11	Fingerprick	NEG	NA
J0242508_1512	J0242508	FALSE	2015-12	Fingerprick	NEG	NA
J0242508_1612	J0242508	FALSE	2016-12	Fingerprick	NEG	NA
J0242509_1504	J0242509	FALSE	2015-04	Fingerprick	NEG	NA
J0242509_1511	J0242509	FALSE	2015-11	Fingerprick	NEG	NA
J0242509_1512	J0242509	FALSE	2015-12	Fingerprick	NEG	NA
J0242509_1603	J0242509	FALSE	2016-03	Fingerprick	NEG	NA
J0242509_1607	J0242509	FALSE	2016-07	Fingerprick	NEG	NA
J0242509_1611	J0242509	FALSE	2016-11	Fingerprick	POS	NA
J0242509_1612	J0242509	FALSE	2016-12	Fingerprick	NEG	NA
J0242510_1511	J0242510	FALSE	2015-11	Fingerprick	NEG	NA
J0242510_1512	J0242510	FALSE	2015-12	Fingerprick	NEG	NA
J0242510_1603	J0242510	FALSE	2016-03	Fingerprick	NEG	NA
J0242510_1607	J0242510	FALSE	2016-07	Fingerprick	NEG	NA
J0242511_1504	J0242511	FALSE	2015-04	Fingerprick	NEG	NA
J0242512_1506	J0242512	FALSE	2015-06	Fingerprick	NEG	NA
J0242513_1412	J0242513	FALSE	2014-12	Fingerprick	NEG	NA
J0242513_1504	J0242513	FALSE	2015-04	Fingerprick	NEG	NA
J0242513_1511	J0242513	FALSE	2015-11	Fingerprick	NEG	NA
J0242513_1512	J0242513	FALSE	2015-12	Fingerprick	NEG	NA
J0242513_1603	J0242513	FALSE	2016-03	Fingerprick	NEG	NA
J0242514_1412	J0242514	FALSE	2014-12	Fingerprick	NEG	NA
J0242514_1511	J0242514	FALSE	2015-11	Fingerprick	NEG	NA
J0242514_1512	J0242514	FALSE	2015-12	Fingerprick	NEG	NA
J0242514_1603	J0242514	FALSE	2016-03	Fingerprick	NEG	NA
J0242515_1412	J0242515	FALSE	2014-12	Fingerprick	NEG	NA
J0242515_1506	J0242515	FALSE	2015-06	Fingerprick	NEG	NA
J0242515_1511	J0242515	FALSE	2015-11	Fingerprick	NEG	NA
J0242515_1512	J0242515	FALSE	2015-12	Fingerprick	NEG	NA
J0242515_1603	J0242515	FALSE	2016-03	Fingerprick	NEG	NA
J0242515_1607	J0242515	FALSE	2016-07	Fingerprick	NEG	NA
J0242516_1506	J0242516	FALSE	2015-06	Fingerprick	NEG	NA
J0242516_1511	J0242516	FALSE	2015-11	Fingerprick	NEG	NA
J0242516_1607	J0242516	FALSE	2016-07	Fingerprick	NEG	NA
J0242517_1412	J0242517	FALSE	2014-12	Fingerprick	NEG	NA
J0242517_1511	J0242517	FALSE	2015-11	Fingerprick	NEG	NA
J0242517_1512	J0242517	FALSE	2015-12	Fingerprick	NEG	NA
J0242517_1603	J0242517	FALSE	2016-03	Fingerprick	NEG	NA
J0242517_1611	J0242517	FALSE	2016-11	Venous blood	POS	NA
J0242518_1412	J0242518	FALSE	2014-12	Fingerprick	NA	NA
J0242518_1504	J0242518	FALSE	2015-04	Fingerprick	NEG	NA
J0242518_1512	J0242518	FALSE	2015-12	Fingerprick	NEG	NA
J0242518_1603	J0242518	FALSE	2016-03	Fingerprick	NEG	NA
J0242519_1412	J0242519	FALSE	2014-12	Fingerprick	NEG	NA
J0242519_1512	J0242519	FALSE	2015-12	Fingerprick	NEG	NA
J0242519_1607	J0242519	FALSE	2016-07	Fingerprick	NEG	NA
J0242520_1412	J0242520	FALSE	2014-12	Fingerprick	POS	NA
J0242520_1511	J0242520	FALSE	2015-11	Fingerprick	NEG	NA
J0242520_1512	J0242520	FALSE	2015-12	Fingerprick	NEG	NA
J0242520_1603	J0242520	FALSE	2016-03	Fingerprick	NEG	NA
J0242520_1607	J0242520	FALSE	2016-07	Fingerprick	NEG	NA
J0242521_1412	J0242521	FALSE	2014-12	Fingerprick	NEG	NA
J0242521_1511	J0242521	FALSE	2015-11	Fingerprick	NEG	NA
J0252602_1412	J0252602	FALSE	2014-12	Fingerprick	NEG	NA
J0252602_1511	J0252602	FALSE	2015-11	Fingerprick	NEG	NA
J0252602_1512	J0252602	FALSE	2015-12	Fingerprick	NEG	NA
J0252602_1603	J0252602	FALSE	2016-03	Fingerprick	NEG	NA
J0252602_1607	J0252602	FALSE	2016-07	Fingerprick	NEG	NA
J0252602_1611	J0252602	FALSE	2016-11	Fingerprick	NEG	NA
J0252602_1612	J0252602	FALSE	2016-12	Fingerprick	NEG	NA
J0252603_1412	J0252603	FALSE	2014-12	Fingerprick	NEG	NA
J0252603_1504	J0252603	FALSE	2015-04	Fingerprick	NEG	NA
J0252603_1512	J0252603	FALSE	2015-12	Fingerprick	NEG	NA
J0252603_1603	J0252603	FALSE	2016-03	Fingerprick	NEG	NA
J0252603_1607	J0252603	FALSE	2016-07	Fingerprick	NEG	NA
J0252603_1610	J0252603	FALSE	2016-10	Fingerprick	NEG	NA
J0252603_1611	J0252603	FALSE	2016-11	Fingerprick	NEG	NA
J0252603_1612	J0252603	FALSE	2016-12	Fingerprick	NEG	NA
J0252605_1412	J0252605	FALSE	2014-12	Fingerprick	NEG	NA
J0252605_1504	J0252605	FALSE	2015-04	Fingerprick	NEG	NA
J0252605_1512	J0252605	FALSE	2015-12	Fingerprick	NEG	NA
J0252605_1603	J0252605	FALSE	2016-03	Fingerprick	NEG	NA
J0252605_1611	J0252605	FALSE	2016-11	Fingerprick	NEG	NA
J0252605_1612	J0252605	FALSE	2016-12	Fingerprick	NEG	NA
J0252608_1412	J0252608	FALSE	2014-12	Fingerprick	NEG	NA
J0252608_1512	J0252608	FALSE	2015-12	Fingerprick	NEG	NA
J0252608_1603	J0252608	FALSE	2016-03	Fingerprick	NEG	NA
J0252608_1607	J0252608	FALSE	2016-07	Fingerprick	NEG	NA
J0252608_1611	J0252608	FALSE	2016-11	Fingerprick	NEG	NA
J0252608_1612	J0252608	FALSE	2016-12	Fingerprick	NEG	NA
J0252609_1412	J0252609	FALSE	2014-12	Fingerprick	POS	NA
J0252609_1511	J0252609	FALSE	2015-11	Fingerprick	NEG	NA
J0252609_1512	J0252609	FALSE	2015-12	Fingerprick	NEG	NA
J0252609_1603	J0252609	FALSE	2016-03	Fingerprick	NEG	NA
J0252609_1607	J0252609	FALSE	2016-07	Fingerprick	NEG	NA
J0252609_1610	J0252609	FALSE	2016-10	Fingerprick	NEG	NA
J0252609_1611	J0252609	FALSE	2016-11	Fingerprick	NEG	NA
J0252609_1612	J0252609	FALSE	2016-12	Fingerprick	NEG	NA
J0252610_1412	J0252610	FALSE	2014-12	Fingerprick	NA	NA
J0252610_1506	J0252610	FALSE	2015-06	Fingerprick	NEG	NA
J0252610_1511	J0252610	FALSE	2015-11	Fingerprick	NEG	NA
J0252610_1512	J0252610	FALSE	2015-12	Fingerprick	NEG	NA
J0252610_1603	J0252610	FALSE	2016-03	Fingerprick	NEG	NA
J0252610_1610	J0252610	FALSE	2016-10	Fingerprick	NEG	2016-10
J0252610_1611	J0252610	FALSE	2016-11	Venous blood	POS	NA
J0252610_1612	J0252610	FALSE	2016-12	Fingerprick	NEG	NA
J0252611_1511	J0252611	FALSE	2015-11	Fingerprick	NEG	NA
J0252611_1512	J0252611	FALSE	2015-12	Fingerprick	NEG	NA
J0252611_1603	J0252611	FALSE	2016-03	Fingerprick	NEG	NA
J0252611_1607	J0252611	FALSE	2016-07	Fingerprick	NEG	NA
J0252611_1610	J0252611	FALSE	2016-10	Fingerprick	NEG	NA
J0252611_1611	J0252611	FALSE	2016-11	Fingerprick	NEG	NA
J0252611_1612	J0252611	FALSE	2016-12	Fingerprick	NEG	NA
J0252612_1504	J0252612	FALSE	2015-04	Fingerprick	NEG	NA
J0252613_1603	J0252613	FALSE	2016-03	Fingerprick	NEG	NA
J0252613_1611	J0252613	FALSE	2016-11	Venous blood	POS	NA
J0252613_1612	J0252613	FALSE	2016-12	Fingerprick	NEG	NA
J0252614_1504	J0252614	FALSE	2015-04	Fingerprick	NEG	NA
J0252614_1511	J0252614	FALSE	2015-11	Fingerprick	NEG	NA
J0252614_1512	J0252614	FALSE	2015-12	Fingerprick	NEG	NA
J0252614_1603	J0252614	FALSE	2016-03	Fingerprick	NEG	NA
J0252614_1607	J0252614	FALSE	2016-07	Fingerprick	NEG	NA
J0252614_1611	J0252614	FALSE	2016-11	Venous blood	NEG	NA
J0252614_1612	J0252614	FALSE	2016-12	Fingerprick	NEG	NA
J0252616_1603	J0252616	FALSE	2016-03	Fingerprick	NEG	NA
J0252616_1611	J0252616	FALSE	2016-11	Fingerprick	NEG	NA
J0252616_1612	J0252616	FALSE	2016-12	Fingerprick	NEG	NA
J0252617_1412	J0252617	FALSE	2014-12	Fingerprick	NEG	NA
J0252617_1504	J0252617	FALSE	2015-04	Fingerprick	NEG	NA
J0252617_1512	J0252617	FALSE	2015-12	Fingerprick	NEG	NA
J0252617_1611	J0252617	FALSE	2016-11	Fingerprick	NEG	NA
J0252617_1612	J0252617	FALSE	2016-12	Fingerprick	NEG	NA
J0252618_1412	J0252618	FALSE	2014-12	Fingerprick	NEG	NA
J0252618_1607	J0252618	FALSE	2016-07	Fingerprick	NEG	NA
J0252618_1611	J0252618	FALSE	2016-11	Fingerprick	NEG	NA
J0252618_1612	J0252618	FALSE	2016-12	Fingerprick	NEG	NA
J0252619_1412	J0252619	FALSE	2014-12	Fingerprick	NEG	NA
J0252619_1603	J0252619	FALSE	2016-03	Fingerprick	NEG	NA
J0252619_1612	J0252619	FALSE	2016-12	Fingerprick	NEG	NA
J0252620_1511	J0252620	FALSE	2015-11	Fingerprick	POS	NA
J0252620_1512	J0252620	FALSE	2015-12	Fingerprick	NEG	NA
J0252620_1603	J0252620	FALSE	2016-03	Fingerprick	NEG	NA
J0252620_1611	J0252620	FALSE	2016-11	Fingerprick	NEG	NA
J0252621_1412	J0252621	FALSE	2014-12	Fingerprick	NEG	NA
J0252621_1511	J0252621	FALSE	2015-11	Fingerprick	NEG	NA
J0252621_1512	J0252621	FALSE	2015-12	Fingerprick	NEG	NA
J0262702_1412	J0262702	FALSE	2014-12	Fingerprick	NEG	NA
J0262702_1511	J0262702	FALSE	2015-11	Fingerprick	NEG	NA
J0262702_1607	J0262702	FALSE	2016-07	Fingerprick	NEG	NA
J0262702_1612	J0262702	FALSE	2016-12	Fingerprick	NEG	NA
J0262703_1603	J0262703	FALSE	2016-03	Fingerprick	NEG	NA
J0262703_1607	J0262703	FALSE	2016-07	Fingerprick	NEG	NA
J0262704_1512	J0262704	FALSE	2015-12	Fingerprick	NEG	NA
J0262704_1607	J0262704	FALSE	2016-07	Fingerprick	POS	NA
J0262705_1412	J0262705	FALSE	2014-12	Fingerprick	NEG	NA
J0262705_1504	J0262705	FALSE	2015-04	Fingerprick	NEG	NA
J0262705_1511	J0262705	FALSE	2015-11	Fingerprick	NEG	NA
J0262705_1607	J0262705	FALSE	2016-07	Fingerprick	NEG	NA
J0262706_1512	J0262706	FALSE	2015-12	Fingerprick	NEG	NA
J0262706_1603	J0262706	FALSE	2016-03	Fingerprick	NEG	NA
J0262706_1607	J0262706	FALSE	2016-07	Fingerprick	NEG	NA
J0262706_1612	J0262706	TRUE	2016-12	Fingerprick	POS	NA
J0262707_1412	J0262707	FALSE	2014-12	Fingerprick	POS	NA
J0262707_1504	J0262707	FALSE	2015-04	Fingerprick	NEG	NA
J0262707_1506	J0262707	FALSE	2015-06	Fingerprick	POS	NA
J0262707_1511	J0262707	FALSE	2015-11	Fingerprick	NEG	NA
J0262707_1603	J0262707	FALSE	2016-03	Fingerprick	NEG	NA
J0262708_1512	J0262708	FALSE	2015-12	Fingerprick	NEG	NA
J0262708_1603	J0262708	FALSE	2016-03	Fingerprick	NEG	NA
J0262708_1607	J0262708	FALSE	2016-07	Fingerprick	NEG	NA
J0262708_1612	J0262708	FALSE	2016-12	Fingerprick	NEG	NA
J0262709_1412	J0262709	FALSE	2014-12	Fingerprick	NEG	NA
J0262709_1504	J0262709	FALSE	2015-04	Fingerprick	NEG	NA
J0262709_1511	J0262709	FALSE	2015-11	Fingerprick	POS	NA
J0262709_1512	J0262709	FALSE	2015-12	Fingerprick	NEG	NA
J0262709_1603	J0262709	FALSE	2016-03	Fingerprick	NEG	NA
J0262709_1607	J0262709	FALSE	2016-07	Fingerprick	NEG	NA
J0262710_1412	J0262710	FALSE	2014-12	Fingerprick	NEG	NA
J0262710_1511	J0262710	FALSE	2015-11	Fingerprick	POS	NA
J0262710_1512	J0262710	FALSE	2015-12	Fingerprick	NEG	NA
J0262710_1603	J0262710	FALSE	2016-03	Fingerprick	NEG	NA
J0262710_1607	J0262710	FALSE	2016-07	Fingerprick	NEG	NA
J0262710_1612	J0262710	FALSE	2016-12	Fingerprick	NEG	NA
J0262711_1412	J0262711	FALSE	2014-12	Fingerprick	NEG	NA
J0262711_1504	J0262711	FALSE	2015-04	Fingerprick	NEG	NA
J0262711_1603	J0262711	FALSE	2016-03	Fingerprick	NEG	NA
J0262712_1412	J0262712	FALSE	2014-12	Fingerprick	POS	NA
J0262712_1504	J0262712	FALSE	2015-04	Fingerprick	NEG	NA
J0262712_1511	J0262712	FALSE	2015-11	Fingerprick	NEG	NA
J0262712_1512	J0262712	FALSE	2015-12	Fingerprick	NEG	NA
J0262712_1603	J0262712	FALSE	2016-03	Fingerprick	NEG	NA
J0262712_1607	J0262712	FALSE	2016-07	Fingerprick	NEG	NA
J0262712_1612	J0262712	FALSE	2016-12	Fingerprick	NEG	NA
J0262713_1504	J0262713	FALSE	2015-04	Fingerprick	NEG	NA
J0262713_1512	J0262713	FALSE	2015-12	Fingerprick	NEG	NA
J0262713_1603	J0262713	FALSE	2016-03	Fingerprick	NEG	NA
J0262713_1607	J0262713	FALSE	2016-07	Fingerprick	NEG	NA
J0262713_1612	J0262713	FALSE	2016-12	Fingerprick	NEG	NA
J0262714_1511	J0262714	FALSE	2015-11	Fingerprick	NEG	NA
J0262714_1512	J0262714	FALSE	2015-12	Fingerprick	NEG	NA
J0262714_1603	J0262714	FALSE	2016-03	Fingerprick	NEG	NA
J0262714_1607	J0262714	FALSE	2016-07	Fingerprick	NEG	NA
J0262714_1612	J0262714	FALSE	2016-12	Fingerprick	NEG	NA
J0262715_1511	J0262715	FALSE	2015-11	Fingerprick	NEG	NA
J0262715_1512	J0262715	FALSE	2015-12	Fingerprick	NEG	NA
J0262715_1612	J0262715	FALSE	2016-12	Fingerprick	NEG	NA
J0262716_1412	J0262716	FALSE	2014-12	Fingerprick	NEG	NA
J0262716_1504	J0262716	FALSE	2015-04	Fingerprick	NEG	NA
J0262716_1512	J0262716	FALSE	2015-12	Fingerprick	NEG	NA
J0262716_1603	J0262716	FALSE	2016-03	Fingerprick	NEG	NA
J0262716_1607	J0262716	FALSE	2016-07	Fingerprick	NEG	NA
J0262716_1612	J0262716	FALSE	2016-12	Fingerprick	NEG	NA
J0262717_1412	J0262717	FALSE	2014-12	Fingerprick	NEG	NA
J0262717_1504	J0262717	FALSE	2015-04	Fingerprick	NEG	NA
J0262717_1511	J0262717	FALSE	2015-11	Fingerprick	NEG	NA
J0262717_1512	J0262717	FALSE	2015-12	Fingerprick	NEG	NA
J0262717_1607	J0262717	FALSE	2016-07	Fingerprick	NEG	NA
J0262717_1612	J0262717	FALSE	2016-12	Fingerprick	NEG	NA
J0262718_1412	J0262718	FALSE	2014-12	Fingerprick	NEG	NA
J0262718_1511	J0262718	FALSE	2015-11	Fingerprick	NEG	NA
J0262718_1512	J0262718	FALSE	2015-12	Fingerprick	NEG	NA
J0262718_1603	J0262718	FALSE	2016-03	Fingerprick	NEG	NA
J0262718_1607	J0262718	FALSE	2016-07	Fingerprick	NEG	NA
J0262718_1612	J0262718	FALSE	2016-12	Fingerprick	NEG	NA
J0262719_1412	J0262719	FALSE	2014-12	Fingerprick	NEG	NA
J0262719_1512	J0262719	FALSE	2015-12	Fingerprick	NEG	NA
J0262719_1603	J0262719	FALSE	2016-03	Fingerprick	NEG	NA
J0262719_1607	J0262719	FALSE	2016-07	Fingerprick	NEG	NA
J0262719_1612	J0262719	FALSE	2016-12	Fingerprick	NEG	NA
J0262720_1412	J0262720	FALSE	2014-12	Fingerprick	NEG	NA
J0262720_1504	J0262720	FALSE	2015-04	Fingerprick	NEG	NA
J0262720_1511	J0262720	FALSE	2015-11	Fingerprick	NEG	NA
J0262720_1512	J0262720	FALSE	2015-12	Fingerprick	NEG	NA
J0262720_1603	J0262720	FALSE	2016-03	Fingerprick	NEG	NA
J0262720_1607	J0262720	FALSE	2016-07	Fingerprick	NEG	NA
J0262720_1612	J0262720	FALSE	2016-12	Fingerprick	NEG	NA
J0262721_1506	J0262721	FALSE	2015-06	Fingerprick	NEG	NA
J0262721_1511	J0262721	FALSE	2015-11	Fingerprick	NEG	NA
J0262721_1512	J0262721	FALSE	2015-12	Fingerprick	NEG	NA
J0262721_1603	J0262721	FALSE	2016-03	Fingerprick	NEG	NA
J0262721_1607	J0262721	FALSE	2016-07	Fingerprick	NEG	NA
J0262721_1612	J0262721	FALSE	2016-12	Fingerprick	NEG	NA
J0262722_1504	J0262722	FALSE	2015-04	Fingerprick	NEG	NA
J0262722_1512	J0262722	FALSE	2015-12	Fingerprick	NEG	NA
J0262722_1603	J0262722	FALSE	2016-03	Fingerprick	NEG	NA
J0262723_1504	J0262723	FALSE	2015-04	Fingerprick	NEG	NA
J0262723_1511	J0262723	FALSE	2015-11	Fingerprick	POS	NA
J0262723_1512	J0262723	FALSE	2015-12	Fingerprick	NEG	NA
J0262723_1603	J0262723	FALSE	2016-03	Fingerprick	NEG	NA
J0262723_1607	J0262723	FALSE	2016-07	Fingerprick	NEG	NA
J0262723_1612	J0262723	FALSE	2016-12	Fingerprick	NEG	NA
J0262724_1412	J0262724	FALSE	2014-12	Fingerprick	NEG	NA
J0262724_1504	J0262724	FALSE	2015-04	Fingerprick	NEG	NA
J0262724_1511	J0262724	FALSE	2015-11	Fingerprick	NEG	NA
J0262724_1603	J0262724	FALSE	2016-03	Fingerprick	NEG	NA
J0262724_1607	J0262724	FALSE	2016-07	Fingerprick	NEG	NA
J0262724_1612	J0262724	FALSE	2016-12	Fingerprick	NEG	NA
J0262725_1412	J0262725	FALSE	2014-12	Fingerprick	NEG	NA
J0262725_1511	J0262725	FALSE	2015-11	Fingerprick	NEG	NA
J0262725_1512	J0262725	FALSE	2015-12	Fingerprick	NEG	NA
J0262725_1603	J0262725	FALSE	2016-03	Fingerprick	NEG	NA
J0262725_1607	J0262725	FALSE	2016-07	Fingerprick	NEG	NA
J0262725_1612	J0262725	FALSE	2016-12	Fingerprick	NEG	NA
J0262726_1504	J0262726	FALSE	2015-04	Fingerprick	NEG	NA
J0262726_1512	J0262726	FALSE	2015-12	Fingerprick	NEG	NA
J0262726_1612	J0262726	FALSE	2016-12	Fingerprick	NEG	NA
J0262727_1504	J0262727	FALSE	2015-04	Fingerprick	NEG	NA
J0262728_1504	J0262728	FALSE	2015-04	Fingerprick	NEG	NA
J0262728_1512	J0262728	FALSE	2015-12	Fingerprick	NEG	NA
J0262728_1603	J0262728	FALSE	2016-03	Fingerprick	NEG	NA
J0262728_1607	J0262728	FALSE	2016-07	Fingerprick	NEG	NA
J0262728_1612	J0262728	FALSE	2016-12	Fingerprick	NEG	NA
J0262729_1512	J0262729	FALSE	2015-12	Fingerprick	NEG	NA
J0262729_1603	J0262729	FALSE	2016-03	Fingerprick	NEG	NA
J0262729_1607	J0262729	FALSE	2016-07	Fingerprick	NEG	NA
J0262729_1612	J0262729	FALSE	2016-12	Fingerprick	NEG	NA
J0262730_1412	J0262730	FALSE	2014-12	Fingerprick	NEG	NA
J0262730_1511	J0262730	FALSE	2015-11	Fingerprick	NEG	NA
J0262730_1603	J0262730	FALSE	2016-03	Fingerprick	NEG	NA
J0262730_1607	J0262730	FALSE	2016-07	Fingerprick	NEG	NA
J0262730_1612	J0262730	FALSE	2016-12	Fingerprick	NEG	NA
J0262731_1412	J0262731	FALSE	2014-12	Fingerprick	POS	NA
J0262731_1506	J0262731	FALSE	2015-06	Fingerprick	NEG	NA
J0262731_1511	J0262731	FALSE	2015-11	Fingerprick	NEG	NA
J0262732_1412	J0262732	FALSE	2014-12	Fingerprick	NEG	NA
J0262732_1511	J0262732	FALSE	2015-11	Fingerprick	NEG	NA
J0262732_1512	J0262732	FALSE	2015-12	Fingerprick	NEG	NA
J0262732_1603	J0262732	FALSE	2016-03	Fingerprick	NEG	NA
J0262732_1612	J0262732	FALSE	2016-12	Fingerprick	NEG	NA
J0262733_1412	J0262733	FALSE	2014-12	Fingerprick	NEG	NA
J0262733_1504	J0262733	FALSE	2015-04	Fingerprick	NEG	NA
J0262733_1512	J0262733	FALSE	2015-12	Fingerprick	NEG	NA
J0262733_1603	J0262733	FALSE	2016-03	Fingerprick	NEG	NA
J0262733_1612	J0262733	FALSE	2016-12	Fingerprick	NEG	NA
J0262734_1504	J0262734	FALSE	2015-04	Fingerprick	NEG	NA
J0262734_1511	J0262734	FALSE	2015-11	Fingerprick	NEG	NA
J0262734_1603	J0262734	FALSE	2016-03	Fingerprick	NEG	NA
J0262734_1607	J0262734	FALSE	2016-07	Fingerprick	NEG	NA
J0262734_1612	J0262734	FALSE	2016-12	Fingerprick	NEG	NA
J0262735_1504	J0262735	FALSE	2015-04	Fingerprick	NEG	NA
J0262735_1607	J0262735	FALSE	2016-07	Fingerprick	NEG	NA
J0262739_1412	J0262739	FALSE	2014-12	Fingerprick	POS	NA
J0262739_1504	J0262739	FALSE	2015-04	Fingerprick	NEG	NA
J0262740_1412	J0262740	FALSE	2014-12	Fingerprick	NEG	NA
J0262740_1504	J0262740	FALSE	2015-04	Fingerprick	NEG	NA
J0262740_1511	J0262740	FALSE	2015-11	Fingerprick	NEG	NA
J0262740_1607	J0262740	FALSE	2016-07	Fingerprick	NEG	NA
J0262740_1612	J0262740	FALSE	2016-12	Fingerprick	NEG	NA
J0262741_1412	J0262741	FALSE	2014-12	Fingerprick	NA	NA
J0262741_1504	J0262741	FALSE	2015-04	Fingerprick	NEG	NA
J0262741_1511	J0262741	FALSE	2015-11	Fingerprick	NEG	NA
J0262741_1512	J0262741	FALSE	2015-12	Fingerprick	NA	NA
J0262741_1605	J0262741	FALSE	2016-05	Fingerprick	NEG	NA
J0262741_1607	J0262741	FALSE	2016-07	Fingerprick	NEG	NA
J0262741_1612	J0262741	FALSE	2016-12	Fingerprick	NEG	NA
J0262742_1412	J0262742	FALSE	2014-12	Fingerprick	NEG	NA
J0262742_1512	J0262742	FALSE	2015-12	Fingerprick	NEG	NA
J0262742_1603	J0262742	FALSE	2016-03	Fingerprick	NEG	NA
J0262742_1607	J0262742	FALSE	2016-07	Fingerprick	NEG	NA
J0262742_1612	J0262742	FALSE	2016-12	Fingerprick	NEG	NA
J0262743_1412	J0262743	FALSE	2014-12	Fingerprick	NEG	NA
J0262743_1603	J0262743	FALSE	2016-03	Fingerprick	NEG	NA
J0262743_1612	J0262743	FALSE	2016-12	Fingerprick	NEG	NA
J0262744_1412	J0262744	FALSE	2014-12	Fingerprick	NA	NA
J0262744_1607	J0262744	FALSE	2016-07	Fingerprick	NEG	NA
J0262744_1611	J0262744	FALSE	2016-11	Venous blood	POS	NA
J0262744_1612	J0262744	FALSE	2016-12	Fingerprick	NEG	NA
J0262745_1412	J0262745	FALSE	2014-12	Fingerprick	NEG	NA
J0262745_1512	J0262745	FALSE	2015-12	Fingerprick	NEG	NA
J0262745_1603	J0262745	FALSE	2016-03	Fingerprick	NEG	NA
J0262745_1607	J0262745	FALSE	2016-07	Fingerprick	NEG	NA
J0262745_1612	J0262745	FALSE	2016-12	Fingerprick	NEG	NA
J0262746_1512	J0262746	FALSE	2015-12	Fingerprick	NEG	NA
J0272801_1511	J0272801	FALSE	2015-11	Fingerprick	NEG	NA
J0272801_1512	J0272801	FALSE	2015-12	Fingerprick	NEG	NA
J0272801_1603	J0272801	FALSE	2016-03	Fingerprick	NEG	NA
J0272801_1611	J0272801	FALSE	2016-11	Fingerprick	NEG	NA
J0272801_1612	J0272801	FALSE	2016-12	Fingerprick	NEG	NA
J0272802_1412	J0272802	FALSE	2014-12	Fingerprick	POS	NA
J0272802_1504	J0272802	FALSE	2015-04	Fingerprick	NEG	NA
J0272802_1511	J0272802	FALSE	2015-11	Fingerprick	POS	NA
J0272802_1512	J0272802	FALSE	2015-12	Fingerprick	NEG	NA
J0272802_1603	J0272802	FALSE	2016-03	Fingerprick	NEG	NA
J0272802_1607	J0272802	FALSE	2016-07	Fingerprick	NEG	NA
J0272802_1610	J0272802	FALSE	2016-10	Fingerprick	NEG	NA
J0272802_1611	J0272802	FALSE	2016-11	Fingerprick	NEG	NA
J0272802_1612	J0272802	FALSE	2016-12	Fingerprick	NEG	NA
J0272803_1412	J0272803	FALSE	2014-12	Fingerprick	NEG	NA
J0272803_1512	J0272803	FALSE	2015-12	Fingerprick	POS	NA
J0272804_1412	J0272804	FALSE	2014-12	Fingerprick	NEG	NA
J0272804_1504	J0272804	FALSE	2015-04	Fingerprick	NEG	NA
J0272804_1511	J0272804	FALSE	2015-11	Fingerprick	POS	NA
J0272804_1512	J0272804	FALSE	2015-12	Fingerprick	NEG	NA
J0272804_1603	J0272804	FALSE	2016-03	Fingerprick	NEG	NA
J0272804_1607	J0272804	FALSE	2016-07	Fingerprick	NEG	NA
J0272804_1610	J0272804	FALSE	2016-10	Fingerprick	NEG	NA
J0272804_1611	J0272804	FALSE	2016-11	Fingerprick	POS	NA
J0272805_1412	J0272805	FALSE	2014-12	Fingerprick	POS	NA
J0272805_1611	J0272805	FALSE	2016-11	Fingerprick	NEG	NA
J0272805_1612	J0272805	FALSE	2016-12	Fingerprick	NEG	NA
J0272806_1412	J0272806	FALSE	2014-12	Fingerprick	NEG	NA
J0272806_1511	J0272806	FALSE	2015-11	Fingerprick	NEG	NA
J0272806_1610	J0272806	FALSE	2016-10	Fingerprick	NEG	NA
J0272806_1611	J0272806	FALSE	2016-11	Fingerprick	NEG	NA
J0272806_1612	J0272806	FALSE	2016-12	Fingerprick	NEG	NA
J0272807_1511	J0272807	FALSE	2015-11	Fingerprick	NEG	NA
J0272807_1607	J0272807	FALSE	2016-07	Fingerprick	NEG	NA
J0272807_1610	J0272807	FALSE	2016-10	Fingerprick	NEG	NA
J0272807_1611	J0272807	FALSE	2016-11	Fingerprick	NEG	NA
J0272807_1612	J0272807	FALSE	2016-12	Fingerprick	NEG	NA
J0272808_1511	J0272808	FALSE	2015-11	Fingerprick	NEG	NA
J0272808_1512	J0272808	FALSE	2015-12	Fingerprick	NEG	NA
J0272808_1603	J0272808	FALSE	2016-03	Fingerprick	NEG	NA
J0272809_1412	J0272809	FALSE	2014-12	Fingerprick	NEG	NA
J0272809_1511	J0272809	FALSE	2015-11	Fingerprick	NEG	NA
J0272809_1603	J0272809	FALSE	2016-03	Fingerprick	NEG	NA
J0272809_1611	J0272809	FALSE	2016-11	Venous blood	POS	2016-11
J0272809_1612	J0272809	TRUE	2016-12	Fingerprick	POS	NA
J0272810_1412	J0272810	FALSE	2014-12	Fingerprick	NEG	NA
J0272810_1506	J0272810	FALSE	2015-06	Fingerprick	POS	NA
J0272810_1511	J0272810	FALSE	2015-11	Fingerprick	NEG	NA
J0272810_1610	J0272810	FALSE	2016-10	Fingerprick	NEG	NA
J0272810_1611	J0272810	FALSE	2016-11	Fingerprick	NEG	NA
J0272810_1612	J0272810	FALSE	2016-12	Fingerprick	NEG	NA
J0272811_1412	J0272811	FALSE	2014-12	Fingerprick	NEG	NA
J0272811_1511	J0272811	FALSE	2015-11	Fingerprick	NEG	NA
J0272811_1603	J0272811	FALSE	2016-03	Fingerprick	NEG	NA
J0272811_1610	J0272811	FALSE	2016-10	Fingerprick	NEG	NA
J0272811_1611	J0272811	FALSE	2016-11	Fingerprick	NEG	NA
J0272812_1412	J0272812	FALSE	2014-12	Fingerprick	NEG	NA
J0272812_1511	J0272812	FALSE	2015-11	Fingerprick	NEG	NA
J0272812_1512	J0272812	FALSE	2015-12	Fingerprick	NEG	NA
J0272812_1603	J0272812	FALSE	2016-03	Fingerprick	NEG	NA
J0272812_1607	J0272812	FALSE	2016-07	Fingerprick	NEG	NA
J0272812_1610	J0272812	FALSE	2016-10	Fingerprick	NEG	NA
J0272812_1611	J0272812	FALSE	2016-11	Fingerprick	POS	NA
J0272812_1612	J0272812	FALSE	2016-12	Fingerprick	NEG	NA
J0272813_1412	J0272813	FALSE	2014-12	Fingerprick	NEG	NA
J0272813_1512	J0272813	FALSE	2015-12	Fingerprick	NEG	NA
J0272813_1603	J0272813	FALSE	2016-03	Fingerprick	NEG	NA
J0272813_1607	J0272813	FALSE	2016-07	Fingerprick	NEG	NA
J0272813_1610	J0272813	FALSE	2016-10	Venous blood	POS	2016-10
J0272813_1611	J0272813	FALSE	2016-11	Venous blood	POS	2016-11
J0272813_1612	J0272813	TRUE	2016-12	Venous blood	POS	NA
J0272813_1701	J0272813	TRUE	2017-01	Fingerprick	POS	NA
J0272813_1702	J0272813	TRUE	2017-02	Venous blood	POS	NA
J0272813_1703	J0272813	TRUE	2017-03	Venous blood	POS	NA
J0272813_1704	J0272813	TRUE	2017-04	Venous blood	POS	NA
J0272813_1705	J0272813	TRUE	2017-05	Venous blood	POS	NA
J0272814_1412	J0272814	FALSE	2014-12	Fingerprick	NEG	NA
J0272814_1511	J0272814	FALSE	2015-11	Fingerprick	NEG	NA
J0272814_1512	J0272814	FALSE	2015-12	Fingerprick	NEG	NA
J0272814_1610	J0272814	FALSE	2016-10	Fingerprick	NEG	NA
J0272814_1612	J0272814	FALSE	2016-12	Fingerprick	NEG	NA
J0272815_1504	J0272815	FALSE	2015-04	Fingerprick	NEG	NA
J0272815_1512	J0272815	FALSE	2015-12	Fingerprick	NEG	NA
J0272815_1603	J0272815	FALSE	2016-03	Fingerprick	NEG	NA
J0272815_1610	J0272815	FALSE	2016-10	Fingerprick	NEG	2016-10
J0272815_1611	J0272815	FALSE	2016-11	Venous blood	POS	2016-11
J0272815_1612	J0272815	TRUE	2016-12	Fingerprick	POS	NA
J0272815_1701	J0272815	TRUE	2017-01	Venous blood	POS	NA
J0272815_1702	J0272815	TRUE	2017-02	Venous blood	POS	NA
J0272815_1703	J0272815	TRUE	2017-03	Venous blood	POS	NA
J0272815_1704	J0272815	TRUE	2017-04	Venous blood	POS	NA
J0272815_1705	J0272815	TRUE	2017-05	Venous blood	POS	NA
J0272902_1504	J0272902	FALSE	2015-04	Fingerprick	NA	NA
J0282111_1412	J0282111	FALSE	2014-12	Fingerprick	NA	NA
J0282902_1511	J0282902	FALSE	2015-11	Fingerprick	NEG	NA
J0282902_1512	J0282902	FALSE	2015-12	Fingerprick	NEG	NA
J0282902_1603	J0282902	FALSE	2016-03	Fingerprick	NEG	NA
J0282902_1612	J0282902	FALSE	2016-12	Fingerprick	NEG	NA
J0282904_1511	J0282904	FALSE	2015-11	Fingerprick	NEG	NA
J0282904_1603	J0282904	FALSE	2016-03	Fingerprick	NEG	NA
J0282906_1504	J0282906	FALSE	2015-04	Fingerprick	NEG	NA
J0282906_1511	J0282906	FALSE	2015-11	Fingerprick	NEG	NA
J0282906_1612	J0282906	FALSE	2016-12	Fingerprick	NEG	NA
J0282907_1504	J0282907	FALSE	2015-04	Fingerprick	NEG	NA
J0282907_1511	J0282907	FALSE	2015-11	Fingerprick	NEG	NA
J0282907_1512	J0282907	FALSE	2015-12	Fingerprick	NEG	NA
J0282907_1603	J0282907	FALSE	2016-03	Fingerprick	NEG	NA
J0282907_1612	J0282907	FALSE	2016-12	Fingerprick	NEG	NA
J0282908_1511	J0282908	FALSE	2015-11	Fingerprick	NEG	NA
J0282908_1512	J0282908	FALSE	2015-12	Fingerprick	NEG	NA
J0282908_1603	J0282908	FALSE	2016-03	Fingerprick	NEG	NA
J0282908_1612	J0282908	FALSE	2016-12	Fingerprick	NEG	NA
J0282909_1504	J0282909	FALSE	2015-04	Fingerprick	NEG	NA
J0282909_1511	J0282909	FALSE	2015-11	Fingerprick	NEG	NA
J0282909_1512	J0282909	FALSE	2015-12	Fingerprick	NEG	NA
J0282909_1603	J0282909	FALSE	2016-03	Fingerprick	NEG	NA
J0282909_1612	J0282909	FALSE	2016-12	Fingerprick	NEG	NA
J0282910_1512	J0282910	FALSE	2015-12	Fingerprick	NEG	NA
J0282910_1612	J0282910	FALSE	2016-12	Fingerprick	NEG	NA
J0282911_1412	J0282911	FALSE	2014-12	Fingerprick	NEG	NA
J0282911_1511	J0282911	FALSE	2015-11	Fingerprick	NEG	NA
J0282911_1512	J0282911	FALSE	2015-12	Fingerprick	NEG	NA
J0282911_1603	J0282911	FALSE	2016-03	Fingerprick	NEG	NA
J0282911_1612	J0282911	FALSE	2016-12	Fingerprick	NEG	NA
J0282912_1511	J0282912	FALSE	2015-11	Fingerprick	NEG	NA
J0282912_1512	J0282912	FALSE	2015-12	Fingerprick	NEG	NA
J0282912_1603	J0282912	FALSE	2016-03	Fingerprick	NEG	NA
J0282914_1504	J0282914	FALSE	2015-04	Fingerprick	NEG	NA
J0282914_1512	J0282914	FALSE	2015-12	Fingerprick	NEG	NA
J0282914_1612	J0282914	FALSE	2016-12	Fingerprick	NEG	NA
J0282915_1504	J0282915	FALSE	2015-04	Fingerprick	NEG	NA
J0282915_1511	J0282915	FALSE	2015-11	Fingerprick	POS	NA
J0282915_1512	J0282915	FALSE	2015-12	Fingerprick	NEG	NA
J0282915_1603	J0282915	FALSE	2016-03	Fingerprick	NEG	NA
J0282916_1504	J0282916	FALSE	2015-04	Fingerprick	NEG	NA
J0282916_1512	J0282916	FALSE	2015-12	Fingerprick	NEG	NA
J0282916_1612	J0282916	TRUE	2016-12	Fingerprick	POS	NA
J0282916_1701	J0282916	TRUE	2017-01	Venous blood	POS	NA
J0282916_1702	J0282916	TRUE	2017-02	Venous blood	POS	NA
J0282916_1703	J0282916	TRUE	2017-03	Venous blood	POS	NA
J0282916_1704	J0282916	TRUE	2017-04	Venous blood	POS	NA
J0282916_1705	J0282916	TRUE	2017-05	Venous blood	POS	NA
J0282917_1512	J0282917	FALSE	2015-12	Fingerprick	NEG	NA
J0282917_1603	J0282917	FALSE	2016-03	Fingerprick	NEG	NA
J0282917_1612	J0282917	FALSE	2016-12	Fingerprick	NEG	NA
K0010101_1412	K0010101	FALSE	2014-12	Fingerprick	NEG	NA
K0010101_1504	K0010101	FALSE	2015-04	Fingerprick	NEG	NA
K0010101_1603	K0010101	FALSE	2016-03	Fingerprick	NEG	NA
K0010101_1610	K0010101	FALSE	2016-10	Fingerprick	POS	2016-10
K0010101_1611	K0010101	FALSE	2016-11	Venous blood	POS	NA
K0010101_1612	K0010101	TRUE	2016-12	Fingerprick	POS	NA
K0010102_1412	K0010102	FALSE	2014-12	Fingerprick	NEG	NA
K0010102_1504	K0010102	FALSE	2015-04	Fingerprick	NA	NA
K0010102_1506	K0010102	FALSE	2015-06	Fingerprick	NEG	NA
K0010102_1511	K0010102	FALSE	2015-11	Fingerprick	NEG	NA
K0010102_1512	K0010102	FALSE	2015-12	Fingerprick	NEG	NA
K0010102_1603	K0010102	FALSE	2016-03	Fingerprick	NEG	NA
K0010102_1610	K0010102	FALSE	2016-10	Fingerprick	NEG	NA
K0010102_1611	K0010102	FALSE	2016-11	Fingerprick	NEG	NA
K0010102_1612	K0010102	FALSE	2016-12	Fingerprick	NEG	NA
K0010103_1412	K0010103	FALSE	2014-12	Fingerprick	NEG	NA
K0010103_1610	K0010103	FALSE	2016-10	Fingerprick	NEG	NA
K0010105_1412	K0010105	FALSE	2014-12	Fingerprick	POS	NA
K0010105_1504	K0010105	FALSE	2015-04	Fingerprick	POS	NA
K0010105_1506	K0010105	FALSE	2015-06	Fingerprick	POS	NA
K0010105_1603	K0010105	FALSE	2016-03	Fingerprick	NEG	NA
K0010105_1607	K0010105	FALSE	2016-07	Fingerprick	POS	NA
K0010105_1610	K0010105	FALSE	2016-10	Fingerprick	NEG	NA
K0010105_1611	K0010105	FALSE	2016-11	Fingerprick	NEG	NA
K0010106_1511	K0010106	FALSE	2015-11	Fingerprick	NEG	NA
K0010106_1610	K0010106	FALSE	2016-10	Fingerprick	NEG	NA
K0010106_1612	K0010106	FALSE	2016-12	Fingerprick	NEG	NA
K0010109_1610	K0010109	FALSE	2016-10	Fingerprick	NEG	NA
K0010109_1612	K0010109	FALSE	2016-12	Fingerprick	NEG	NA
K0020201_1412	K0020201	FALSE	2014-12	Fingerprick	NEG	NA
K0020201_1504	K0020201	FALSE	2015-04	Fingerprick	POS	NA
K0020201_1506	K0020201	FALSE	2015-06	Fingerprick	NEG	NA
K0020201_1511	K0020201	FALSE	2015-11	Fingerprick	NEG	NA
K0020201_1512	K0020201	FALSE	2015-12	Fingerprick	NEG	NA
K0020201_1603	K0020201	FALSE	2016-03	Fingerprick	NEG	NA
K0020201_1607	K0020201	FALSE	2016-07	Fingerprick	NEG	NA
K0020202_1412	K0020202	FALSE	2014-12	Fingerprick	NEG	NA
K0020202_1504	K0020202	FALSE	2015-04	Fingerprick	NEG	NA
K0020202_1506	K0020202	FALSE	2015-06	Fingerprick	NEG	NA
K0020202_1511	K0020202	FALSE	2015-11	Fingerprick	NEG	NA
K0020202_1512	K0020202	FALSE	2015-12	Fingerprick	NEG	NA
K0020202_1603	K0020202	FALSE	2016-03	Fingerprick	NEG	NA
K0020202_1607	K0020202	FALSE	2016-07	Fingerprick	NEG	NA
K0020203_1511	K0020203	FALSE	2015-11	Fingerprick	POS	NA
K0020203_1603	K0020203	FALSE	2016-03	Fingerprick	NEG	NA
K0020203_1605	K0020203	FALSE	2016-05	Fingerprick	NEG	NA
K0020204_1412	K0020204	FALSE	2014-12	Fingerprick	NEG	NA
K0020204_1512	K0020204	FALSE	2015-12	Fingerprick	POS	NA
K0020205_1412	K0020205	FALSE	2014-12	Fingerprick	NEG	NA
K0020205_1504	K0020205	FALSE	2015-04	Fingerprick	NEG	NA
K0020205_1511	K0020205	FALSE	2015-11	Fingerprick	NEG	NA
K0020205_1603	K0020205	FALSE	2016-03	Fingerprick	NEG	NA
K0020206_1412	K0020206	FALSE	2014-12	Fingerprick	NEG	NA
K0020206_1504	K0020206	FALSE	2015-04	Fingerprick	NEG	NA
K0020206_1511	K0020206	FALSE	2015-11	Fingerprick	NEG	NA
K0020206_1603	K0020206	FALSE	2016-03	Fingerprick	NEG	NA
K0020206_1607	K0020206	FALSE	2016-07	Fingerprick	NEG	NA
K0020206_1612	K0020206	FALSE	2016-12	Fingerprick	NEG	NA
K0022008_1512	K0022008	FALSE	2015-12	Fingerprick	POS	NA
K0030301_1412	K0030301	FALSE	2014-12	Fingerprick	POS	NA
K0030301_1504	K0030301	FALSE	2015-04	Fingerprick	POS	NA
K0030301_1511	K0030301	FALSE	2015-11	Fingerprick	NEG	NA
K0030301_1512	K0030301	FALSE	2015-12	Fingerprick	NEG	NA
K0030301_1603	K0030301	FALSE	2016-03	Fingerprick	NEG	NA
K0030301_1607	K0030301	FALSE	2016-07	Fingerprick	NEG	2016-07
K0030301_1611	K0030301	FALSE	2016-11	Fingerprick	POS	2016-11
K0030301_1612	K0030301	FALSE	2016-12	Fingerprick	NEG	NA
K0030302_1412	K0030302	FALSE	2014-12	Fingerprick	NEG	NA
K0030302_1504	K0030302	FALSE	2015-04	Fingerprick	NEG	NA
K0030302_1511	K0030302	FALSE	2015-11	Fingerprick	POS	NA
K0030302_1512	K0030302	FALSE	2015-12	Fingerprick	POS	NA
K0030302_1603	K0030302	FALSE	2016-03	Fingerprick	NEG	NA
K0030302_1605	K0030302	FALSE	2016-05	Fingerprick	NEG	NA
K0030302_1607	K0030302	FALSE	2016-07	Fingerprick	POS	2016-07
K0030302_1610	K0030302	FALSE	2016-10	Venous blood	POS	2016-10
K0030302_1611	K0030302	FALSE	2016-11	Venous blood	POS	2016-11
K0030302_1612	K0030302	TRUE	2016-12	Venous blood	POS	NA
K0030303_1412	K0030303	FALSE	2014-12	Fingerprick	POS	NA
K0030303_1504	K0030303	FALSE	2015-04	Fingerprick	NEG	NA
K0030303_1511	K0030303	FALSE	2015-11	Fingerprick	POS	NA
K0030303_1512	K0030303	FALSE	2015-12	Fingerprick	POS	NA
K0030303_1603	K0030303	FALSE	2016-03	Fingerprick	POS	NA
K0030303_1605	K0030303	FALSE	2016-05	Fingerprick	POS	NA
K0030303_1607	K0030303	FALSE	2016-07	Venous blood	POS	2016-07
K0030303_1610	K0030303	FALSE	2016-10	Fingerprick	NEG	NA
K0030303_1611	K0030303	FALSE	2016-11	Venous blood	POS	2016-11
K0030303_1612	K0030303	TRUE	2016-12	Venous blood	POS	NA
K0030304_1412	K0030304	FALSE	2014-12	Fingerprick	NEG	NA
K0030305_1412	K0030305	FALSE	2014-12	Fingerprick	POS	NA
K0030305_1504	K0030305	FALSE	2015-04	Fingerprick	NEG	NA
K0030305_1511	K0030305	FALSE	2015-11	Fingerprick	POS	NA
K0030305_1603	K0030305	FALSE	2016-03	Fingerprick	NEG	NA
K0030306_1603	K0030306	FALSE	2016-03	Fingerprick	NEG	NA
K0030307_1603	K0030307	FALSE	2016-03	Fingerprick	NEG	NA
K0030307_1612	K0030307	FALSE	2016-12	Fingerprick	NEG	NA
K0050501_1412	K0050501	FALSE	2014-12	Fingerprick	NEG	NA
K0050501_1504	K0050501	FALSE	2015-04	Fingerprick	NEG	NA
K0050501_1511	K0050501	FALSE	2015-11	Fingerprick	NEG	NA
K0050501_1512	K0050501	FALSE	2015-12	Fingerprick	NEG	NA
K0050501_1603	K0050501	FALSE	2016-03	Fingerprick	NEG	NA
K0050501_1610	K0050501	FALSE	2016-10	Fingerprick	NEG	NA
K0050502_1412	K0050502	FALSE	2014-12	Fingerprick	NEG	NA
K0050502_1511	K0050502	FALSE	2015-11	Fingerprick	NEG	NA
K0050502_1512	K0050502	FALSE	2015-12	Fingerprick	POS	NA
K0050502_1605	K0050502	FALSE	2016-05	Fingerprick	NEG	NA
K0050502_1610	K0050502	FALSE	2016-10	Fingerprick	NEG	NA
K0050503_1506	K0050503	FALSE	2015-06	Fingerprick	NEG	NA
K0050503_1511	K0050503	FALSE	2015-11	Fingerprick	NEG	NA
K0050503_1512	K0050503	FALSE	2015-12	Fingerprick	NEG	NA
K0050503_1603	K0050503	FALSE	2016-03	Fingerprick	NEG	NA
K0050503_1610	K0050503	FALSE	2016-10	Fingerprick	NEG	NA
K0050503_1611	K0050503	FALSE	2016-11	Fingerprick	NEG	NA
K0050504_1412	K0050504	FALSE	2014-12	Fingerprick	NEG	NA
K0050504_1504	K0050504	FALSE	2015-04	Fingerprick	NEG	NA
K0050504_1506	K0050504	FALSE	2015-06	Fingerprick	NEG	NA
K0050504_1511	K0050504	FALSE	2015-11	Fingerprick	NEG	NA
K0050504_1512	K0050504	FALSE	2015-12	Fingerprick	NEG	NA
K0050504_1603	K0050504	FALSE	2016-03	Fingerprick	NEG	NA
K0050504_1607	K0050504	FALSE	2016-07	Fingerprick	NEG	NA
K0050504_1610	K0050504	FALSE	2016-10	Fingerprick	NEG	NA
K0050504_1611	K0050504	FALSE	2016-11	Fingerprick	NEG	NA
K0050505_1412	K0050505	FALSE	2014-12	Fingerprick	NEG	NA
K0050505_1504	K0050505	FALSE	2015-04	Fingerprick	NEG	NA
K0050505_1506	K0050505	FALSE	2015-06	Fingerprick	NEG	NA
K0050505_1511	K0050505	FALSE	2015-11	Fingerprick	NEG	NA
K0050505_1512	K0050505	FALSE	2015-12	Fingerprick	NEG	NA
K0050505_1603	K0050505	FALSE	2016-03	Fingerprick	NEG	NA
K0050505_1610	K0050505	FALSE	2016-10	Fingerprick	NEG	NA
K0050505_1611	K0050505	FALSE	2016-11	Fingerprick	NEG	NA
K0050506_1511	K0050506	FALSE	2015-11	Fingerprick	NEG	NA
K0050506_1512	K0050506	FALSE	2015-12	Fingerprick	NEG	NA
K0050506_1603	K0050506	FALSE	2016-03	Fingerprick	NEG	NA
K0050506_1610	K0050506	FALSE	2016-10	Fingerprick	NEG	NA
K0050506_1611	K0050506	FALSE	2016-11	Fingerprick	NEG	NA
K0050507_1511	K0050507	FALSE	2015-11	Fingerprick	NEG	NA
K0050507_1512	K0050507	FALSE	2015-12	Fingerprick	NEG	NA
K0050507_1607	K0050507	FALSE	2016-07	Fingerprick	NEG	NA
K0050507_1611	K0050507	FALSE	2016-11	Fingerprick	POS	NA
K0050508_1504	K0050508	FALSE	2015-04	Fingerprick	NEG	NA
K0050508_1511	K0050508	FALSE	2015-11	Fingerprick	NEG	NA
K0050508_1512	K0050508	FALSE	2015-12	Fingerprick	NEG	NA
K0050508_1603	K0050508	FALSE	2016-03	Fingerprick	POS	NA
K0050508_1605	K0050508	FALSE	2016-05	Fingerprick	NA	NA
K0050508_1607	K0050508	FALSE	2016-07	Fingerprick	POS	NA
K0050508_1610	K0050508	FALSE	2016-10	Fingerprick	NEG	NA
K0050508_1611	K0050508	FALSE	2016-11	Fingerprick	POS	NA
K0050509_1504	K0050509	FALSE	2015-04	Fingerprick	NEG	NA
K0050509_1511	K0050509	FALSE	2015-11	Fingerprick	NEG	NA
K0050509_1512	K0050509	FALSE	2015-12	Fingerprick	NEG	NA
K0050509_1603	K0050509	FALSE	2016-03	Fingerprick	NEG	NA
K0050509_1610	K0050509	FALSE	2016-10	Fingerprick	NEG	NA
K0050509_1611	K0050509	FALSE	2016-11	Fingerprick	POS	NA
K0050510_1504	K0050510	FALSE	2015-04	Fingerprick	NA	NA
K0050510_1506	K0050510	FALSE	2015-06	Fingerprick	NEG	NA
K0050510_1511	K0050510	FALSE	2015-11	Fingerprick	NEG	NA
K0050510_1512	K0050510	FALSE	2015-12	Fingerprick	NEG	NA
K0050510_1603	K0050510	FALSE	2016-03	Fingerprick	NEG	NA
K0050510_1607	K0050510	FALSE	2016-07	Fingerprick	NEG	NA
K0050510_1610	K0050510	FALSE	2016-10	Fingerprick	POS	2016-10
K0050510_1611	K0050510	FALSE	2016-11	Fingerprick	NEG	NA
K0050512_1504	K0050512	FALSE	2015-04	Fingerprick	NEG	NA
K0050512_1512	K0050512	FALSE	2015-12	Fingerprick	NEG	NA
K0050512_1610	K0050512	FALSE	2016-10	Fingerprick	NEG	NA
K0050512_1611	K0050512	FALSE	2016-11	Fingerprick	POS	NA
K0050513_1504	K0050513	FALSE	2015-04	Fingerprick	NEG	NA
K0050513_1511	K0050513	FALSE	2015-11	Fingerprick	NEG	NA
K0050513_1512	K0050513	FALSE	2015-12	Fingerprick	NEG	NA
K0050513_1603	K0050513	FALSE	2016-03	Fingerprick	NEG	NA
K0050513_1610	K0050513	FALSE	2016-10	Fingerprick	NEG	NA
K0050513_1611	K0050513	FALSE	2016-11	Fingerprick	NEG	NA
K0050516_1511	K0050516	FALSE	2015-11	Fingerprick	POS	NA
K0050516_1512	K0050516	FALSE	2015-12	Fingerprick	NEG	NA
K0050516_1605	K0050516	FALSE	2016-05	Fingerprick	NEG	NA
K0050516_1607	K0050516	FALSE	2016-07	Fingerprick	NEG	NA
K0050516_1611	K0050516	FALSE	2016-11	Fingerprick	NEG	NA
K0050519_1506	K0050519	FALSE	2015-06	Fingerprick	NEG	NA
K0050519_1607	K0050519	FALSE	2016-07	Fingerprick	NEG	NA
K0050519_1610	K0050519	FALSE	2016-10	Fingerprick	POS	2016-10
K0050519_1611	K0050519	FALSE	2016-11	Fingerprick	NEG	NA
K0050520_1603	K0050520	FALSE	2016-03	Fingerprick	NEG	NA
K0050520_1610	K0050520	FALSE	2016-10	Fingerprick	NEG	NA
K0050520_1611	K0050520	FALSE	2016-11	Fingerprick	NEG	NA
K0050521_1603	K0050521	FALSE	2016-03	Fingerprick	NEG	NA
K0050521_1610	K0050521	FALSE	2016-10	Fingerprick	NEG	NA
K0050521_1611	K0050521	FALSE	2016-11	Fingerprick	NEG	NA
K0060601_1412	K0060601	FALSE	2014-12	Fingerprick	NEG	NA
K0060601_1511	K0060601	FALSE	2015-11	Fingerprick	NEG	NA
K0060601_1603	K0060601	FALSE	2016-03	Fingerprick	NEG	NA
K0060601_1612	K0060601	FALSE	2016-12	Fingerprick	NEG	NA
K0060602_1504	K0060602	FALSE	2015-04	Fingerprick	NEG	NA
K0060602_1512	K0060602	FALSE	2015-12	Fingerprick	NEG	NA
K0060602_1603	K0060602	FALSE	2016-03	Fingerprick	NEG	NA
K0060602_1612	K0060602	FALSE	2016-12	Fingerprick	NEG	NA
K0060604_1412	K0060604	FALSE	2014-12	Fingerprick	NEG	NA
K0060604_1603	K0060604	FALSE	2016-03	Fingerprick	NEG	NA
K0060604_1612	K0060604	FALSE	2016-12	Fingerprick	NEG	NA
K0060605_1504	K0060605	FALSE	2015-04	Fingerprick	NEG	NA
K0060605_1511	K0060605	FALSE	2015-11	Fingerprick	NEG	NA
K0060605_1512	K0060605	FALSE	2015-12	Fingerprick	NEG	NA
K0060605_1603	K0060605	FALSE	2016-03	Fingerprick	NEG	NA
K0060605_1612	K0060605	FALSE	2016-12	Fingerprick	NEG	NA
K0060606_1511	K0060606	FALSE	2015-11	Fingerprick	NEG	NA
K0060606_1512	K0060606	FALSE	2015-12	Fingerprick	NEG	NA
K0060606_1603	K0060606	FALSE	2016-03	Fingerprick	NEG	NA
K0060606_1612	K0060606	FALSE	2016-12	Fingerprick	NEG	NA
K0060607_1412	K0060607	FALSE	2014-12	Fingerprick	NEG	NA
K0060607_1504	K0060607	FALSE	2015-04	Fingerprick	NEG	NA
K0060607_1511	K0060607	FALSE	2015-11	Fingerprick	NEG	NA
K0060607_1512	K0060607	FALSE	2015-12	Fingerprick	NEG	NA
K0060607_1603	K0060607	FALSE	2016-03	Fingerprick	NEG	NA
K0060607_1612	K0060607	FALSE	2016-12	Fingerprick	NEG	NA
K0060609_1412	K0060609	FALSE	2014-12	Fingerprick	NEG	NA
K0060609_1511	K0060609	FALSE	2015-11	Fingerprick	POS	NA
K0060609_1605	K0060609	FALSE	2016-05	Fingerprick	POS	NA
K0060610_1412	K0060610	FALSE	2014-12	Fingerprick	NEG	NA
K0060610_1504	K0060610	FALSE	2015-04	Fingerprick	POS	NA
K0060610_1506	K0060610	FALSE	2015-06	Fingerprick	POS	NA
K0060610_1511	K0060610	FALSE	2015-11	Fingerprick	NEG	NA
K0060610_1512	K0060610	FALSE	2015-12	Fingerprick	NEG	NA
K0060610_1603	K0060610	FALSE	2016-03	Fingerprick	NEG	NA
K0060610_1612	K0060610	FALSE	2016-12	Fingerprick	NEG	NA
K0060611_1511	K0060611	FALSE	2015-11	Fingerprick	NEG	NA
K0060611_1603	K0060611	FALSE	2016-03	Fingerprick	NEG	NA
K0060611_1612	K0060611	FALSE	2016-12	Fingerprick	NEG	NA
K0060613_1412	K0060613	FALSE	2014-12	Fingerprick	NEG	NA
K0060613_1504	K0060613	FALSE	2015-04	Fingerprick	NEG	NA
K0060613_1511	K0060613	FALSE	2015-11	Fingerprick	NEG	NA
K0060614_1412	K0060614	FALSE	2014-12	Fingerprick	NEG	NA
K0060614_1511	K0060614	FALSE	2015-11	Fingerprick	POS	NA
K0060614_1603	K0060614	FALSE	2016-03	Fingerprick	NEG	NA
K0060614_1605	K0060614	FALSE	2016-05	Fingerprick	NEG	NA
K0060614_1612	K0060614	FALSE	2016-12	Fingerprick	NEG	NA
K0060615_1412	K0060615	FALSE	2014-12	Fingerprick	NEG	NA
K0060615_1511	K0060615	FALSE	2015-11	Fingerprick	NEG	NA
K0060615_1603	K0060615	FALSE	2016-03	Fingerprick	NEG	NA
K0060615_1612	K0060615	FALSE	2016-12	Fingerprick	NEG	NA
K0060616_1504	K0060616	FALSE	2015-04	Fingerprick	NEG	NA
K0060616_1612	K0060616	FALSE	2016-12	Fingerprick	NEG	NA
K0060617_1412	K0060617	FALSE	2014-12	Fingerprick	NEG	NA
K0060617_1504	K0060617	FALSE	2015-04	Fingerprick	NEG	NA
K0060617_1511	K0060617	FALSE	2015-11	Fingerprick	POS	NA
K0060617_1512	K0060617	FALSE	2015-12	Fingerprick	POS	NA
K0060617_1603	K0060617	FALSE	2016-03	Fingerprick	POS	NA
K0060617_1605	K0060617	FALSE	2016-05	Fingerprick	POS	NA
K0060617_1607	K0060617	FALSE	2016-07	Venous blood	POS	NA
K0060617_1612	K0060617	FALSE	2016-12	Fingerprick	NEG	NA
K0060619_1504	K0060619	FALSE	2015-04	Fingerprick	NEG	NA
K0060619_1612	K0060619	FALSE	2016-12	Fingerprick	NEG	NA
K0070701_1603	K0070701	FALSE	2016-03	Fingerprick	NEG	NA
K0070701_1607	K0070701	FALSE	2016-07	Fingerprick	NEG	NA
K0070701_1610	K0070701	FALSE	2016-10	Fingerprick	NEG	NA
K0070701_1611	K0070701	FALSE	2016-11	Fingerprick	POS	NA
K0070701_1612	K0070701	FALSE	2016-12	Fingerprick	NEG	NA
K0070703_1504	K0070703	FALSE	2015-04	Fingerprick	NEG	NA
K0070703_1511	K0070703	FALSE	2015-11	Fingerprick	NEG	NA
K0070703_1512	K0070703	FALSE	2015-12	Fingerprick	NEG	NA
K0070703_1610	K0070703	FALSE	2016-10	Fingerprick	NEG	NA
K0070703_1611	K0070703	FALSE	2016-11	Fingerprick	NEG	NA
K0070705_1504	K0070705	FALSE	2015-04	Fingerprick	NEG	NA
K0070706_1412	K0070706	FALSE	2014-12	Fingerprick	NEG	NA
K0070706_1610	K0070706	FALSE	2016-10	Fingerprick	NEG	NA
K0070706_1612	K0070706	FALSE	2016-12	Fingerprick	NEG	NA
K0070707_1412	K0070707	FALSE	2014-12	Fingerprick	NEG	NA
K0070707_1504	K0070707	FALSE	2015-04	Fingerprick	NEG	NA
K0070707_1512	K0070707	FALSE	2015-12	Fingerprick	NEG	NA
K0070707_1607	K0070707	FALSE	2016-07	Fingerprick	NEG	NA
K0070707_1610	K0070707	FALSE	2016-10	Fingerprick	NEG	NA
K0070708_1412	K0070708	FALSE	2014-12	Fingerprick	NEG	NA
K0070708_1504	K0070708	FALSE	2015-04	Fingerprick	NEG	NA
K0070708_1512	K0070708	FALSE	2015-12	Fingerprick	NEG	NA
K0070708_1607	K0070708	FALSE	2016-07	Fingerprick	NEG	NA
K0070708_1610	K0070708	FALSE	2016-10	Fingerprick	NEG	NA
K0070708_1611	K0070708	FALSE	2016-11	Fingerprick	NEG	NA
K0070708_1612	K0070708	FALSE	2016-12	Fingerprick	NEG	NA
K0070709_1412	K0070709	FALSE	2014-12	Fingerprick	NEG	NA
K0070709_1504	K0070709	FALSE	2015-04	Fingerprick	NEG	NA
K0070709_1511	K0070709	FALSE	2015-11	Fingerprick	NEG	NA
K0070709_1512	K0070709	FALSE	2015-12	Fingerprick	NEG	NA
K0070709_1610	K0070709	FALSE	2016-10	Fingerprick	NEG	2016-10
K0070709_1611	K0070709	FALSE	2016-11	Fingerprick	POS	2016-11
K0070709_1612	K0070709	FALSE	2016-12	Fingerprick	NEG	NA
K0070710_1607	K0070710	FALSE	2016-07	Fingerprick	NEG	NA
K0070710_1610	K0070710	FALSE	2016-10	Fingerprick	NEG	NA
K0070710_1611	K0070710	FALSE	2016-11	Fingerprick	NEG	NA
K0070711_1412	K0070711	FALSE	2014-12	Fingerprick	NEG	NA
K0070711_1504	K0070711	FALSE	2015-04	Fingerprick	NEG	NA
K0070711_1512	K0070711	FALSE	2015-12	Fingerprick	NEG	NA
K0070711_1603	K0070711	FALSE	2016-03	Fingerprick	NEG	NA
K0070711_1607	K0070711	FALSE	2016-07	Fingerprick	NEG	NA
K0070711_1610	K0070711	FALSE	2016-10	Fingerprick	NEG	NA
K0070711_1611	K0070711	FALSE	2016-11	Fingerprick	NEG	NA
K0070712_1512	K0070712	FALSE	2015-12	Fingerprick	NEG	NA
K0070712_1603	K0070712	FALSE	2016-03	Fingerprick	NEG	NA
K0070712_1607	K0070712	FALSE	2016-07	Fingerprick	NEG	NA
K0070712_1610	K0070712	FALSE	2016-10	Fingerprick	NEG	NA
K0070712_1611	K0070712	FALSE	2016-11	Fingerprick	NEG	NA
K0070712_1612	K0070712	FALSE	2016-12	Fingerprick	NEG	NA
K0070713_1412	K0070713	FALSE	2014-12	Fingerprick	NEG	NA
K0070713_1512	K0070713	FALSE	2015-12	Fingerprick	NEG	NA
K0070713_1603	K0070713	FALSE	2016-03	Fingerprick	NEG	NA
K0070713_1610	K0070713	FALSE	2016-10	Venous blood	POS	2016-10
K0070713_1611	K0070713	FALSE	2016-11	Fingerprick	NEG	NA
K0070713_1612	K0070713	FALSE	2016-12	Fingerprick	NEG	NA
K0070714_1412	K0070714	FALSE	2014-12	Fingerprick	NEG	NA
K0070714_1512	K0070714	FALSE	2015-12	Fingerprick	NEG	NA
K0070714_1603	K0070714	FALSE	2016-03	Fingerprick	NEG	NA
K0070714_1607	K0070714	FALSE	2016-07	Fingerprick	NEG	NA
K0070714_1611	K0070714	FALSE	2016-11	Venous blood	POS	NA
K0070715_1412	K0070715	FALSE	2014-12	Fingerprick	NEG	NA
K0070715_1504	K0070715	FALSE	2015-04	Fingerprick	NEG	NA
K0070715_1512	K0070715	FALSE	2015-12	Fingerprick	NEG	NA
K0070715_1607	K0070715	FALSE	2016-07	Fingerprick	NEG	NA
K0070715_1610	K0070715	FALSE	2016-10	Fingerprick	NEG	NA
K0070715_1611	K0070715	FALSE	2016-11	Fingerprick	NEG	NA
K0070715_1612	K0070715	FALSE	2016-12	Fingerprick	NEG	NA
K0070720_1512	K0070720	FALSE	2015-12	Fingerprick	NEG	NA
K0070720_1603	K0070720	FALSE	2016-03	Fingerprick	NEG	NA
K0070720_1610	K0070720	FALSE	2016-10	Fingerprick	NEG	NA
K0070720_1611	K0070720	FALSE	2016-11	Fingerprick	POS	2016-11
K0070721_1603	K0070721	FALSE	2016-03	Fingerprick	NEG	NA
K0070721_1610	K0070721	FALSE	2016-10	Fingerprick	NEG	NA
K0070721_1611	K0070721	FALSE	2016-11	Fingerprick	NEG	NA
K0070721_1612	K0070721	FALSE	2016-12	Fingerprick	NEG	NA
K0070722_1603	K0070722	FALSE	2016-03	Fingerprick	NEG	NA
K0070722_1607	K0070722	FALSE	2016-07	Fingerprick	NEG	NA
K0070723_1603	K0070723	FALSE	2016-03	Fingerprick	NEG	NA
K0070723_1607	K0070723	FALSE	2016-07	Fingerprick	NEG	NA
K0070723_1612	K0070723	FALSE	2016-12	Fingerprick	NEG	NA
K0080802_1412	K0080802	FALSE	2014-12	Fingerprick	NEG	NA
K0080802_1504	K0080802	FALSE	2015-04	Fingerprick	NEG	NA
K0080802_1511	K0080802	FALSE	2015-11	Fingerprick	NEG	NA
K0080802_1512	K0080802	FALSE	2015-12	Fingerprick	NEG	NA
K0080802_1603	K0080802	FALSE	2016-03	Fingerprick	NEG	NA
K0080802_1607	K0080802	FALSE	2016-07	Fingerprick	NEG	NA
K0080802_1612	K0080802	FALSE	2016-12	Fingerprick	NEG	NA
K0080803_1412	K0080803	FALSE	2014-12	Fingerprick	NEG	NA
K0080803_1511	K0080803	FALSE	2015-11	Fingerprick	NEG	NA
K0080803_1603	K0080803	FALSE	2016-03	Fingerprick	NEG	NA
K0080803_1607	K0080803	FALSE	2016-07	Fingerprick	NEG	NA
K0080804_1412	K0080804	FALSE	2014-12	Fingerprick	NEG	NA
K0080804_1504	K0080804	FALSE	2015-04	Fingerprick	NEG	NA
K0080804_1511	K0080804	FALSE	2015-11	Fingerprick	NEG	NA
K0080804_1512	K0080804	FALSE	2015-12	Fingerprick	NEG	NA
K0080804_1603	K0080804	FALSE	2016-03	Fingerprick	NEG	NA
K0080807_1412	K0080807	FALSE	2014-12	Fingerprick	NEG	NA
K0080807_1504	K0080807	FALSE	2015-04	Fingerprick	NEG	NA
K0080807_1511	K0080807	FALSE	2015-11	Fingerprick	NEG	NA
K0080807_1512	K0080807	FALSE	2015-12	Fingerprick	NEG	NA
K0080807_1603	K0080807	FALSE	2016-03	Fingerprick	NEG	NA
K0080807_1607	K0080807	FALSE	2016-07	Fingerprick	NEG	NA
K0080807_1612	K0080807	FALSE	2016-12	Fingerprick	NEG	NA
K0080808_1603	K0080808	FALSE	2016-03	Fingerprick	NEG	NA
K0080808_1607	K0080808	FALSE	2016-07	Fingerprick	NEG	NA
K0080808_1612	K0080808	FALSE	2016-12	Fingerprick	NEG	NA
K0080809_1603	K0080809	FALSE	2016-03	Fingerprick	NEG	NA
K0080809_1612	K0080809	TRUE	2016-12	Venous blood	POS	NA
K0080809_1701	K0080809	TRUE	2017-01	Venous blood	NEG	NA
K0080809_1702	K0080809	TRUE	2017-02	Fingerprick	POS	NA
K0080810_1603	K0080810	FALSE	2016-03	Fingerprick	NEG	NA
K0080810_1612	K0080810	FALSE	2016-12	Fingerprick	NEG	NA
K0090901_1412	K0090901	FALSE	2014-12	Fingerprick	NEG	NA
K0090901_1504	K0090901	FALSE	2015-04	Fingerprick	NEG	NA
K0090901_1506	K0090901	FALSE	2015-06	Fingerprick	NEG	NA
K0090901_1512	K0090901	FALSE	2015-12	Fingerprick	NEG	NA
K0090901_1603	K0090901	FALSE	2016-03	Fingerprick	NEG	NA
K0090901_1607	K0090901	FALSE	2016-07	Fingerprick	NEG	NA
K0090901_1610	K0090901	FALSE	2016-10	Fingerprick	NEG	NA
K0090901_1611	K0090901	FALSE	2016-11	Fingerprick	NEG	NA
K0090902_1412	K0090902	FALSE	2014-12	Fingerprick	NEG	NA
K0090902_1504	K0090902	FALSE	2015-04	Fingerprick	POS	NA
K0090902_1506	K0090902	FALSE	2015-06	Fingerprick	NEG	NA
K0090902_1511	K0090902	FALSE	2015-11	Fingerprick	NEG	NA
K0090902_1512	K0090902	FALSE	2015-12	Fingerprick	NEG	NA
K0090902_1603	K0090902	FALSE	2016-03	Fingerprick	NEG	NA
K0090902_1607	K0090902	FALSE	2016-07	Venous blood	NEG	NA
K0090902_1610	K0090902	FALSE	2016-10	Fingerprick	NEG	NA
K0090903_1412	K0090903	FALSE	2014-12	Fingerprick	NEG	NA
K0090903_1504	K0090903	FALSE	2015-04	Fingerprick	NEG	NA
K0090903_1511	K0090903	FALSE	2015-11	Fingerprick	POS	NA
K0090903_1512	K0090903	FALSE	2015-12	Fingerprick	POS	NA
K0090903_1603	K0090903	FALSE	2016-03	Fingerprick	POS	NA
K0090903_1605	K0090903	FALSE	2016-05	Fingerprick	POS	NA
K0090903_1607	K0090903	FALSE	2016-07	Fingerprick	POS	NA
K0090903_1610	K0090903	FALSE	2016-10	Fingerprick	POS	NA
K0090903_1611	K0090903	FALSE	2016-11	Fingerprick	POS	NA
K0090904_1504	K0090904	FALSE	2015-04	Fingerprick	NEG	NA
K0090904_1506	K0090904	FALSE	2015-06	Fingerprick	NEG	NA
K0090904_1603	K0090904	FALSE	2016-03	Fingerprick	NEG	NA
K0090904_1610	K0090904	FALSE	2016-10	Fingerprick	POS	NA
K0090904_1611	K0090904	FALSE	2016-11	Fingerprick	POS	NA
K0090905_1412	K0090905	FALSE	2014-12	Fingerprick	NEG	NA
K0090905_1504	K0090905	FALSE	2015-04	Fingerprick	NEG	NA
K0090905_1512	K0090905	FALSE	2015-12	Fingerprick	NEG	NA
K0090905_1603	K0090905	FALSE	2016-03	Fingerprick	NEG	NA
K0090905_1607	K0090905	FALSE	2016-07	Fingerprick	POS	NA
K0090905_1610	K0090905	FALSE	2016-10	Fingerprick	NEG	NA
K0090905_1611	K0090905	FALSE	2016-11	Fingerprick	POS	NA
K0090906_1504	K0090906	FALSE	2015-04	Fingerprick	POS	NA
K0090906_1506	K0090906	FALSE	2015-06	Fingerprick	POS	NA
K0090906_1511	K0090906	FALSE	2015-11	Fingerprick	NEG	NA
K0090906_1603	K0090906	FALSE	2016-03	Fingerprick	NEG	NA
K0090906_1610	K0090906	FALSE	2016-10	Fingerprick	NEG	NA
K0090906_1611	K0090906	FALSE	2016-11	Fingerprick	POS	NA
K0090907_1603	K0090907	FALSE	2016-03	Fingerprick	NEG	NA
K0090907_1607	K0090907	FALSE	2016-07	Fingerprick	NEG	NA
K0090907_1610	K0090907	FALSE	2016-10	Fingerprick	NEG	NA
K0090907_1611	K0090907	FALSE	2016-11	Fingerprick	POS	NA
K0090908_1610	K0090908	FALSE	2016-10	Fingerprick	NEG	NA
K0090909_1603	K0090909	FALSE	2016-03	Fingerprick	NEG	NA
K0101001_1412	K0101001	FALSE	2014-12	Fingerprick	NEG	NA
K0101001_1511	K0101001	FALSE	2015-11	Fingerprick	NEG	NA
K0101001_1512	K0101001	FALSE	2015-12	Fingerprick	NEG	NA
K0101001_1603	K0101001	FALSE	2016-03	Fingerprick	NEG	NA
K0101001_1612	K0101001	FALSE	2016-12	Fingerprick	NEG	NA
K0101002_1412	K0101002	FALSE	2014-12	Fingerprick	NEG	NA
K0101002_1504	K0101002	FALSE	2015-04	Fingerprick	NEG	NA
K0101002_1511	K0101002	FALSE	2015-11	Fingerprick	NA	NA
K0101002_1512	K0101002	FALSE	2015-12	Fingerprick	NEG	NA
K0101002_1603	K0101002	FALSE	2016-03	Fingerprick	NEG	NA
K0101002_1607	K0101002	FALSE	2016-07	Fingerprick	NEG	NA
K0101002_1612	K0101002	FALSE	2016-12	Fingerprick	NEG	NA
K0101003_1412	K0101003	FALSE	2014-12	Fingerprick	NEG	NA
[truncated: 3,576 more rows]
