# Supplementary material for: Household clustering and seasonal genetic variation of Plasmodium falciparum at the community-level in The Gambia
Source: eLife. 2025 May 27;13:RP103047. doi: 10.7554/eLife.103047 (PMC12113269; doi:10.7554/eLife.103047)
Supplement: Supplementary file 3. [file elife-103047-supp3.xlsx]

## Sheet: TS3 - Genotyped SNPs
Locus_ID	Chromosome	Position	Barcode order	Consensus barcode order
Pf3D7_01_v3.145515	Pf3D7_01_v3	145515	1	1
Pf3D7_01_v3.179347	Pf3D7_01_v3	179347	2	NA
Pf3D7_01_v3.180554	Pf3D7_01_v3	180554	3	2
Pf3D7_01_v3.283144	Pf3D7_01_v3	283144	4	3
Pf3D7_01_v3.535211	Pf3D7_01_v3	535211	5	4
Pf3D7_02_v3.376222	Pf3D7_02_v3	376222	6	NA
Pf3D7_02_v3.470013	Pf3D7_02_v3	470013	7	5
Pf3D7_02_v3.529709	Pf3D7_02_v3	529709	8	6
Pf3D7_02_v3.714480	Pf3D7_02_v3	714480	9	7
Pf3D7_02_v3.839620	Pf3D7_02_v3	839620	10	8
Pf3D7_03_v3.155697	Pf3D7_03_v3	155697	11	NA
Pf3D7_03_v3.548178	Pf3D7_03_v3	548178	12	NA
Pf3D7_03_v3.656861	Pf3D7_03_v3	656861	13	9
Pf3D7_04_v3.110442	Pf3D7_04_v3	110442	14	10
Pf3D7_04_v3.139051	Pf3D7_04_v3	139051	15	11
Pf3D7_04_v3.286542	Pf3D7_04_v3	286542	16	12
Pf3D7_04_v3.426436	Pf3D7_04_v3	426436	17	NA
Pf3D7_04_v3.529500	Pf3D7_04_v3	529500	18	13
Pf3D7_04_v3.531138	Pf3D7_04_v3	531138	19	14
Pf3D7_04_v3.648101	Pf3D7_04_v3	648101	20	15
Pf3D7_04_v3.881571	Pf3D7_04_v3	881571	21	16
Pf3D7_04_v3.891732	Pf3D7_04_v3	891732	22	17
Pf3D7_04_v3.1037656	Pf3D7_04_v3	1037656	23	18
Pf3D7_04_v3.1102392	Pf3D7_04_v3	1102392	24	19
Pf3D7_05_v3.172801	Pf3D7_05_v3	172801	25	NA
Pf3D7_05_v3.350933	Pf3D7_05_v3	350933	26	20
Pf3D7_05_v3.369740	Pf3D7_05_v3	369740	27	21
Pf3D7_05_v3.796714	Pf3D7_05_v3	796714	28	22
Pf3D7_05_v3.1204155	Pf3D7_05_v3	1204155	29	23
Pf3D7_06_v3.574938	Pf3D7_06_v3	574938	30	NA
Pf3D7_06_v3.900278	Pf3D7_06_v3	900278	31	24
Pf3D7_06_v3.1282691	Pf3D7_06_v3	1282691	32	25
Pf3D7_06_v3.1289212	Pf3D7_06_v3	1289212	33	26
Pf3D7_07_v3.461139	Pf3D7_07_v3	461139	34	27
Pf3D7_07_v3.619957	Pf3D7_07_v3	619957	35	28
Pf3D7_07_v3.635985	Pf3D7_07_v3	635985	36	29
Pf3D7_07_v3.704373	Pf3D7_07_v3	704373	37	30
Pf3D7_07_v3.1044052	Pf3D7_07_v3	1044052	38	31
Pf3D7_07_v3.1066698	Pf3D7_07_v3	1066698	39	32
Pf3D7_07_v3.1213486	Pf3D7_07_v3	1213486	40	33
Pf3D7_07_v3.1256331	Pf3D7_07_v3	1256331	41	34
Pf3D7_07_v3.1308383	Pf3D7_07_v3	1308383	42	NA
Pf3D7_07_v3.1358910	Pf3D7_07_v3	1358910	43	35
Pf3D7_07_v3.1359218	Pf3D7_07_v3	1359218	44	36
Pf3D7_08_v3.150033	Pf3D7_08_v3	150033	45	37
Pf3D7_08_v3.339406	Pf3D7_08_v3	339406	46	38
Pf3D7_08_v3.399774	Pf3D7_08_v3	399774	47	39
Pf3D7_08_v3.413067	Pf3D7_08_v3	413067	48	40
Pf3D7_08_v3.417335	Pf3D7_08_v3	417335	49	41
Pf3D7_08_v3.701557	Pf3D7_08_v3	701557	50	42
Pf3D7_08_v3.1056829	Pf3D7_08_v3	1056829	51	43
Pf3D7_08_v3.1313202	Pf3D7_08_v3	1313202	52	44
Pf3D7_08_v3.1314831	Pf3D7_08_v3	1314831	53	45
Pf3D7_09_v3.163977	Pf3D7_09_v3	163977	54	46
Pf3D7_09_v3.452690	Pf3D7_09_v3	452690	55	47
Pf3D7_09_v3.599655	Pf3D7_09_v3	599655	56	48
Pf3D7_09_v3.900277	Pf3D7_09_v3	900277	57	49
Pf3D7_09_v3.1379145	Pf3D7_09_v3	1379145	58	50
Pf3D7_10_v3.317581	Pf3D7_10_v3	317581	59	51
Pf3D7_10_v3.336274	Pf3D7_10_v3	336274	60	52
Pf3D7_10_v3.1383789	Pf3D7_10_v3	1383789	61	53
Pf3D7_10_v3.1385894	Pf3D7_10_v3	1385894	62	54
Pf3D7_10_v3.1386850	Pf3D7_10_v3	1386850	63	55
Pf3D7_11_v3.408668	Pf3D7_11_v3	408668	64	56
Pf3D7_11_v3.477922	Pf3D7_11_v3	477922	65	57
Pf3D7_11_v3.828596	Pf3D7_11_v3	828596	66	58
Pf3D7_11_v3.1006911	Pf3D7_11_v3	1006911	67	59
Pf3D7_11_v3.1018899	Pf3D7_11_v3	1018899	68	60
Pf3D7_11_v3.1020397	Pf3D7_11_v3	1020397	69	61
Pf3D7_11_v3.1294107	Pf3D7_11_v3	1294107	70	62
Pf3D7_11_v3.1295068	Pf3D7_11_v3	1295068	71	NA
Pf3D7_11_v3.1802201	Pf3D7_11_v3	1802201	72	63
Pf3D7_11_v3.1815412	Pf3D7_11_v3	1815412	73	64
Pf3D7_11_v3.1935031	Pf3D7_11_v3	1935031	74	65
Pf3D7_11_v3.1935227	Pf3D7_11_v3	1935227	75	66
Pf3D7_12_v3.857245	Pf3D7_12_v3	857245	76	67
Pf3D7_12_v3.858501	Pf3D7_12_v3	858501	77	68
Pf3D7_12_v3.1663492	Pf3D7_12_v3	1663492	78	69
Pf3D7_12_v3.1667593	Pf3D7_12_v3	1667593	79	70
Pf3D7_12_v3.1934745	Pf3D7_12_v3	1934745	80	71
Pf3D7_12_v3.2171901	Pf3D7_12_v3	2171901	81	NA
Pf3D7_13_v3.159086	Pf3D7_13_v3	159086	82	72
Pf3D7_13_v3.388365	Pf3D7_13_v3	388365	83	73
Pf3D7_13_v3.1056452	Pf3D7_13_v3	1056452	84	74
Pf3D7_13_v3.1233218	Pf3D7_13_v3	1233218	85	75
Pf3D7_13_v3.1419519	Pf3D7_13_v3	1419519	86	76
Pf3D7_13_v3.1466422	Pf3D7_13_v3	1466422	87	77
Pf3D7_13_v3.1867630	Pf3D7_13_v3	1867630	88	78
Pf3D7_13_v3.2161975	Pf3D7_13_v3	2161975	89	79
Pf3D7_13_v3.2377887	Pf3D7_13_v3	2377887	90	NA
Pf3D7_13_v3.2573828	Pf3D7_13_v3	2573828	91	80
Pf3D7_14_v3.107014	Pf3D7_14_v3	107014	92	81
Pf3D7_14_v3.137622	Pf3D7_14_v3	137622	93	82
Pf3D7_14_v3.438592	Pf3D7_14_v3	438592	94	83
Pf3D7_14_v3.1757603	Pf3D7_14_v3	1757603	95	84
Pf3D7_14_v3.2164225	Pf3D7_14_v3	2164225	96	85
Pf3D7_14_v3.2355751	Pf3D7_14_v3	2355751	97	86
Pf3D7_14_v3.2625887	Pf3D7_14_v3	2625887	98	NA
Pf3D7_14_v3.2733656	Pf3D7_14_v3	2733656	99	87
Pf3D7_14_v3.3046108	Pf3D7_14_v3	3046108	100	88
Pf3D7_14_v3.3126219	Pf3D7_14_v3	3126219	101	89
