# Supplementary material for: Household clustering and seasonal genetic variation of Plasmodium falciparum at the community-level in The Gambia
Source: eLife. 2025 May 27;13:RP103047. doi: 10.7554/eLife.103047 (PMC12113269; doi:10.7554/eLife.103047)
Supplement: Supplementary file 4. — Barcode_ID is the sample identifier used in this study. [file elife-103047-supp4.xlsx]

## Sheet: TS5 - Genomes
Genome_ID	VCF_ID	ERR_ID	Collection type	Percent bases not covered	Percent genome covered at 5X	Mean coverage	Mean insert size	Square-deviation insert size	Average read length	Read number	Percent reads mapped	Percent mapped reads properly paired
J0010103_1412	PA0916-CW	ERR1939387	Fingerprick	0.0522	0.9174	141.52	513.9	453.1	143	30275242	0.9835	0.7923
J0010107_1506	PA1013-CW	ERR1939282	Fingerprick	0.8932	0.131	19.59	413.8	1587.3	144	33235538	0.4076	0.6168
J0010113_1412	PA0924-CW	ERR1939379	Fingerprick	0.754	0.1076	10.28	653.1	1983.7	147	28821554	0.2182	0.6305
J0010117_1611	SPT21688	ERR2436106	Venous blood	0.7834	0.2694	25.49	655.1	1689.6	147	41086752	0.3404	0.7316
J0010118_1506	PA0999-CW	ERR1939295	Fingerprick	0.9557	0.0248	9.43	513.5	1850.2	150	34218846	0.0372	0.6946
J0010119_1506	PA1022-CW	ERR1939279	Fingerprick	0.9687	0.0212	14.1	2379.1	3572.5	149	32432799	0.0418	0.0134
J0010121_1506	PA1002-CW	ERR1939281	Fingerprick	0.9762	0.0109	8.74	2387	3460.5	150	25910831	0.0076	0.0332
J0010125_1412	PA0918-CW	ERR1939390	Fingerprick	0.5487	0.1766	13.45	1407.8	2857.1	137	40310311	0.4535	0.2839
J0020302_1506	PA1038-CW	ERR1939305	Fingerprick	0.0427	0.9494	197.12	500.7	397.8	145	35987871	0.9902	0.856
J0020311_1412	PA0671-CW	ERR1939373	Fingerprick	0.7433	0.0693	7.49	440.8	1530.7	149	35562854	0.1463	0.7985
J0020316_1412	PA0907-CW	ERR1939378	Fingerprick	0.4991	0.258	14.73	2014.2	3129.4	134	34852373	0.4469	0.6085
J0020322_1511	PA1449-Cw	ERR2299427	Fingerprick	0.6736	0.0891	5.65	463.2	1067.1	148	4713735	0.2765	0.7337
J0030406_1701	SPT21844	ERR2506075	Venous blood	0.045	0.9422	194.01	660.8	525.1	142	46992366	0.982	0.7481
J0030406_1702	SPT21877	ERR2506101	Venous blood	0.0424	0.9482	278.81	778.8	791.3	145	83105975	0.9929	0.8436
J0030406_1704	SPT21901	ERR2541880	Venous blood	0.9218	0.0078	2.45	368.3	374.6	150	1379316	0.0752	0.8363
J0030406_1705	SPT21927	ERR2496629	Venous blood	0.0562	0.9107	102.95	829.1	1114.6	147	19492663	0.8978	0.8785
J0030407_1506	PA1010-CW	ERR1939299	Fingerprick	0.9636	0.0184	12.6	4043.6	3862.5	150	33978765	0.0302	0.0307
J0030407_1512	PA1457-Cw	ERR2299422	Fingerprick	0.401	0.362	26.98	720.7	1448.6	140	18800574	0.6123	0.4287
J0030409_1610	SPT21661	ERR2436089	Venous blood	0.0413	0.9464	180.49	510.8	519.9	145	29830479	0.9974	0.8778
J0050605_1412	PA0897-CW	ERR1939389	Fingerprick	0.6414	0.1957	15.51	939.3	2134	146	22458625	0.2697	0.4888
J0050605_1511	PA1424-Cw	ERR2299395	Fingerprick	0.3233	0.3847	16.08	803.3	1825.4	142	23217174	0.6003	0.5217
J0050607_1412	PA0899-CW	ERR1939392	Fingerprick	0.0601	0.9078	160.89	519	453.2	144	40076965	0.9671	0.823
J0050607_1611	SPT21689	ERR2436107	Venous blood	0.7865	0.2484	21.36	1632.4	2164.5	145	21956932	0.7997	0.5844
J0050611_1611	SPT21723	ERR2436051	Fingerprick	0.0171	0.9835	183.03	572.5	481.8	147	29240548	0.9951	0.9286
J0050617_1611	SPT21743	ERR2436067	Venous blood	0.03	0.9587	192.45	729	993	147	31208795	0.9951	0.9149
J0050618_1610	SPT21662	ERR2436090	Venous blood	0.4857	0.3381	36.12	428.1	1049.3	132	36318301	0.9959	0.6213
J0050619_1412	PA0923-CW	ERR1939375	Fingerprick	0.7276	0.1271	11.81	903.8	2357.8	147	31912713	0.2041	0.5555
J0060701_1504	PA1054-CW	ERR1939313	Fingerprick	0.445	0.2219	10.05	878.2	1088.7	147	13096031	0.5417	0.3557
J0060701_1511	PA1447-Cw	ERR2299421	Fingerprick	0.0294	0.9563	267.96	593.2	604.7	146	54203914	0.9314	0.8934
J0060703_1506	PA1021-CW	ERR1939300	Fingerprick	0.9608	0.0188	7.94	1008.3	2549.7	149	35928635	0.0505	0.4892
J0070804_1610	SPT21668	ERR2436093	Venous blood	0.1775	0.7347	102.52	806.1	1244	139	47150226	0.8633	0.637
J0091005_1611	SPT21703	ERR2436036	Venous blood	0.7141	0.374	37.07	474.2	1131.6	147	42728352	0.6951	0.8707
J0101102_1412	PA0920-CW	ERR1939393	Fingerprick	0.6053	0.1767	11.1	803.2	2160.9	139	25603746	0.4677	0.3767
J0101103_1701	SPT21838	ERR2506070	Venous blood	0.04	0.9498	196.86	854.3	1153.5	147	33120678	0.9941	0.8994
J0101103_1702	SPT21872	ERR2506096	Venous blood	0.0449	0.9427	182.18	683	529.4	144	35500033	0.9904	0.7998
J0101103_1703	SPT21956	ERR2496651	Venous blood	0.2903	0.3529	8.02	765.3	1093.9	150	3938700	0.291	0.8807
J0101103_1704	SPT21904	ERR2541882	Fingerprick	0.7071	0.271	45.15	650.3	785.2	145	47524394	0.9378	0.8409
J0101103_1705	SPT21920	ERR2541895	Venous blood	0.9339	0.0121	3.1	330.8	404.8	150	1209037	0.1018	0.8454
J0111201_1412	PA0901-CW	ERR1939374	Fingerprick	0.3429	0.415	25.55	697.4	1586.8	141	13876911	0.5559	0.4876
J0111208_1610	SPT21667	ERR2436092	Venous blood	0.0469	0.9396	186.81	809	1178.2	146	35725788	0.9925	0.8776
J0111208_1611	SPT21702	ERR2436035	Venous blood	0.8367	0.1844	20.98	968.2	1763.5	149	33062318	0.6543	0.8432
J0131403_1511	PA1411-Cw	ERR2299409	Fingerprick	0.0178	0.9729	264.14	553.7	470.7	144	54435123	0.99	0.8257
J0131406_1512	PA1340-Cw	ERR2299410	Fingerprick	0.0565	0.9129	168.67	735.7	1098.7	146	46179393	0.9184	0.8568
J0141503_1511	PA1446-Cw	ERR2299418	Fingerprick	0.0296	0.9546	225.1	606.8	497.1	143	46181584	0.9851	0.7996
J0151604_1506	PA1019-CW	ERR1939297	Fingerprick	0.9105	0.0899	14.48	436.4	1625.3	148	34219266	0.2273	0.7061
J0151608_1701	SPT21837	ERR2506069	Venous blood	0.0759	0.8416	53.49	829.6	1180.6	148	9662512	0.8766	0.9139
J0151608_1703	SPT21958	ERR2496653	Fingerprick	0.6168	0.2052	17.69	470.1	1592.6	130	78411798	0.7761	0.644
J0151612_1511	PA1453-Cw	ERR2299417	Fingerprick	0.0074	0.9895	226.36	511.2	400.3	147	38237512	0.9895	0.9292
J0171802_1611	SPT21741	ERR2436065	Venous blood	0.0259	0.958	172.5	758.6	1057.7	147	28210051	0.995	0.9158
J0171803_1506	PA1033-CW	ERR1939320	Fingerprick	0.6601	0.067	5.42	471.8	1597.3	150	28224160	0.1007	0.8224
J0171803_1611	SPT21693	ERR2436029	Venous blood	0.7667	0.2913	47.97	1550.8	1781.3	138	54302898	0.8782	0.268
J0171804_1610	SPT21666	ERR2524268	Venous blood	0.1779	0.6988	91.28	784.8	1081.8	146	27515939	0.851	0.8418
J0171805_1611	SPT21740	ERR2436064	Venous blood	0.0406	0.949	220.44	744	693.9	145	46125162	0.9614	0.8279
J0171806_1511	PA1448-Cw	ERR2299424	Fingerprick	0.0564	0.9067	95.62	682.5	1064	147	18809428	0.8106	0.9013
J0181902_1506	PA1018-CW	ERR1939294	Fingerprick	0.972	0.0145	10.62	1906.5	3274.5	150	31013068	0.0136	0.0174
J0181906_1506	PA1023-CW	ERR1939304	Fingerprick	0.6024	0.117	8.21	646.7	1631	150	30409875	0.1463	0.7932
J0181908_1506	PA1008-CW	ERR1939293	Fingerprick	0.954	0.0316	11.34	1800.9	3199.5	150	30063132	0.0354	0.1665
J0181910_1506	PA1012-CW	ERR1939278	Fingerprick	0.9463	0.0326	12.73	2846.8	3649.7	150	43916672	0.0341	0.0835
J0181910_1511	PA1451-Cw	ERR2299413	Fingerprick	0.5855	0.1109	4.99	490.4	995.9	150	4604819	0.1802	0.8359
J0181911_1611	SPT21742	ERR2436066	Venous blood	0.0469	0.9295	159.35	755.6	1171.7	146	31572461	0.9938	0.8928
J0192001_1412	PA0913-CW	ERR1939384	Fingerprick	0.6887	0.1403	13.95	1117.6	2612.6	138	30706067	0.5688	0.2884
J0222302_1701	SPT21830	ERR2524275	Venous blood	0.6071	0.3206	27.54	592.8	1826.2	142	44890590	0.6243	0.7611
J0232404_1511	PA1444-Cw	ERR2299416	Fingerprick	0.4415	0.227	11.3	619.7	1672.3	143	10404858	0.4078	0.4891
J0242505_1506	PA1001-CW	ERR1939277	Fingerprick	0.9703	0.0123	6.73	3013	3549.2	150	18939175	0.0103	0.072
J0242509_1611	SPT21731	ERR2436057	Fingerprick	0.0155	0.9876	194.97	602.3	362.5	147	31098477	0.9918	0.9285
J0242512_1506	PA1024-CW	ERR1939308	Fingerprick	0.7149	0.0446	4.46	389	1314.7	150	26216402	0.0739	0.896
J0242517_1611	SPT21707	ERR2436039	Venous blood	0.0825	0.8251	60.53	542.1	1176.9	131	35465832	0.9981	0.637
J0252610_1611	SPT21694	ERR2436030	Venous blood	0.8971	0.0932	13.34	540.5	1229.3	148	9139005	0.4327	0.8634
J0262707_1412	PA0895-CW	ERR1939324	Fingerprick	0.0465	0.9425	186.47	514.7	426.1	146	32684556	0.9881	0.8676
J0262707_1506	PA1009-CW	ERR1939296	Fingerprick	0.6083	0.3292	48.48	494.3	514.9	147	34617883	0.3565	0.7587
J0262723_1511	PA1450-Cw	ERR2299429	Fingerprick	0.0403	0.9328	136.15	620.4	933	147	23614291	0.9285	0.9216
J0262731_1412	PA0900-CW	ERR1939370	Fingerprick	0.0521	0.9251	162.4	518.4	430.7	143	37888575	0.982	0.7843
J0262732_1412	PA0911-CW	ERR1939381	Fingerprick	0.7312	0.0906	12.37	834.6	2154.1	134	9843453	0.925	0.2976
J0272803_1412	PA0935-CW	ERR1939385	Fingerprick	0.7251	0.1055	9.85	658.4	1851.7	146	13373465	0.3282	0.3645
J0272803_1512	PA1339-Cw	ERR2299408	Fingerprick	0.01	0.983	318.58	539.4	491.4	147	66268529	0.9918	0.9106
J0272804_1511	PA1406-Cw	ERR2299407	Fingerprick	0.0276	0.9534	148.63	539.2	487.5	141	28812070	0.9917	0.77
J0272805_1412	PA0921-CW	ERR1939371	Fingerprick	0.5856	0.1354	10.22	1131.8	2600.2	140	20838606	0.5197	0.3363
J0272809_1611	SPT21690	ERR2436026	Venous blood	0.1403	0.7426	96.57	830.2	1168.2	145	29074968	0.9	0.8489
J0272809_1612	SPT21797	ERR2506036	Fingerprick	0.0405	0.9524	267.04	701	701.3	147	50665051	0.9856	0.8896
J0272810_1506	PA1037-CW	ERR1939301	Fingerprick	0.4669	0.2019	10.09	751	2023.7	149	41698394	0.1524	0.597
J0272812_1611	SPT21726	ERR2436054	Fingerprick	0.021	0.9704	189.87	721.5	963.6	147	30483494	0.9932	0.9247
J0272813_1610	SPT21665	ERR2436091	Venous blood	0.3719	0.5039	63.75	849.4	1228.1	145	37280402	0.9552	0.832
J0272813_1611	SPT21691	ERR2436027	Venous blood	0.0341	0.9546	210.45	781	1065.8	146	35175270	0.9927	0.8846
J0272813_1612	SPT21796	ERR2506035	Venous blood	0.0311	0.9548	150.62	777.8	952.2	147	24454615	0.9653	0.9096
J0272813_1701	SPT21835	ERR2506067	Fingerprick	0.0364	0.9535	240	671.7	569.4	146	41788456	0.9943	0.8769
J0272813_1702	SPT21876	ERR2506100	Venous blood	0.043	0.9421	191.59	700	1036.5	148	33352236	0.9964	0.9249
J0272813_1703	SPT21955	ERR2496650	Venous blood	0.0653	0.8792	51.35	820.5	1140.6	148	9951829	0.8274	0.9028
J0272813_1705	SPT21919	ERR2541894	Venous blood	0.0445	0.9441	228.01	800.4	1147.7	147	41263719	0.993	0.8987
J0272815_1611	SPT21692	ERR2436028	Venous blood	0.0547	0.92	141.59	839.5	1227.3	147	25223174	0.9696	0.8926
J0272815_1701	SPT21836	ERR2506068	Venous blood	0.0373	0.9493	183.57	833.5	1082.1	147	29807869	0.9922	0.904
J0272815_1702	SPT21878	ERR2506102	Venous blood	0.0592	0.9086	123.39	700	693.6	140	31032586	0.9931	0.7278
J0272815_1703	SPT21954	ERR2496649	Venous blood	0.0481	0.9272	66.32	753.5	1010.6	148	12028671	0.8429	0.917
J0272815_1704	SPT21895	ERR2541874	Venous blood	0.6388	0.0471	2.65	702	744.2	150	1267262	0.1698	0.7971
J0272815_1705	SPT21921	ERR2541896	Venous blood	0.6483	0.0561	3.04	659.5	1014.9	150	1241327	0.197	0.8447
J0282915_1511	PA1428-Cw	ERR2299403	Fingerprick	0.2817	0.4475	29.28	729.9	1296.1	148	19476280	0.4205	0.7755
J0282916_1701	SPT21831	ERR2506063	Venous blood	0.0414	0.9421	184.56	863.5	1173.5	147	31726815	0.9923	0.8917
J0282916_1702	SPT21873	ERR2506097	Venous blood	0.0399	0.9502	216.18	717.2	694	147	37449922	0.9913	0.8833
J0282916_1703	SPT21953	ERR2496647	Venous blood	0.0981	0.7223	14.95	756.6	1023.7	148	3190492	0.6874	0.9194
J0282916_1705	SPT21922	ERR2496626	Venous blood	0.3288	0.5725	89.09	781.3	859.5	143	33274918	0.9278	0.7765
K0010101_1611	SPT21685	ERR2436104	Venous blood	0.0488	0.9255	112.13	744.1	1179.7	146	18483077	0.9964	0.869
K0010102_1506	PA1039-CW	ERR1939309	Fingerprick	0.529	0.1063	5.73	690.5	1929.9	148	26015123	0.1577	0.6599
K0010105_1506	PA1029-CW	ERR1939314	Fingerprick	0.0722	0.8669	90.92	535.3	475.4	146	34218647	0.5767	0.807
K0020202_1504	PA1075-CW	ERR1939307	Fingerprick	0.6237	0.1452	16.82	565.8	999.7	140	23477985	0.9801	0.6997
K0020202_1506	PA1034-CW	ERR1939323	Fingerprick	0.5796	0.1439	11.07	743	1609.5	149	25940793	0.1763	0.6848
K0022008_1512	PA1326-Cw	ERR2299385	Fingerprick	0.0359	0.9438	173.61	660.1	977.7	147	30884933	0.9358	0.915
K0030301_1504	PA1062-CW	ERR1939322	Fingerprick	0.1007	0.81	124.98	540.7	500.1	146	29806981	0.9883	0.8661
K0030302_1512	PA1330-Cw	ERR2299393	Fingerprick	0.1584	0.6626	20.16	642.4	1009.2	149	5414178	0.5454	0.8967
K0030302_1610	SPT21659	ERR2436088	Venous blood	0.0454	0.9414	189.35	637	458.1	142	40369022	0.9929	0.7516
K0030302_1611	SPT21686	ERR2436105	Venous blood	0.0459	0.9311	155.66	844	1206.2	147	34008273	0.9224	0.8726
K0030303_1512	PA1333-Cw	ERR2299398	Fingerprick	0.0376	0.9409	152.98	609.3	657.3	147	27128347	0.9411	0.898
K0030303_1605	PA1369-Cw	ERR2299399	Fingerprick	0.0281	0.9617	285.27	562.7	536.2	146	55502331	0.9914	0.8992
K0030303_1612	SPT21765	ERR2436075	Venous blood	0.0357	0.9569	253.85	728.1	668.6	146	44342682	0.9924	0.8606
K0050502_1512	PA1329-Cw	ERR2299391	Fingerprick	0.3268	0.3577	12.8	585.3	1052.4	150	6778662	0.4253	0.7841
K0050504_1506	PA0983-CW	ERR1939276	Fingerprick	0.9503	0.0487	15.44	1492.8	3041	148	34142737	0.1433	0.5609
K0050512_1611	SPT21717	ERR2436047	Fingerprick	0.0126	0.9921	203.62	559.3	150.3	147	32828888	0.9882	0.914
K0060610_1504	PA1056-CW	ERR1939316	Fingerprick	0.48	0.2851	21.7	633.9	1185.7	138	43436809	0.8752	0.631
K0060617_1512	PA1338-Cw	ERR2299406	Fingerprick	0.0297	0.9606	274.84	571.8	548.2	146	56283097	0.9641	0.8884
K0060617_1603	PA1349-Cw	ERR2299394	Fingerprick	0.0923	0.7907	66.51	621.8	961.4	138	19433937	0.9724	0.6711
K0070709_1611	SPT21700	ERR2436033	Fingerprick	0.7331	0.2553	32.91	633.5	1409.7	137	41099451	0.697	0.59
K0070714_1611	SPT21744	ERR2436068	Venous blood	0.0351	0.9539	202.6	780	1076.3	147	33913659	0.9948	0.9145
K0080809_1612	SPT21764	ERR2436074	Venous blood	0.7246	0.3218	31.15	846.3	946.9	143	33239636	0.7386	0.6382
K0080809_1701	SPT21809	ERR2506044	Venous blood	0.9726	0.009	2.93	355.4	386.7	150	1112563	0.0559	0.6795
K0080809_1702	SPT21864	ERR2506091	Fingerprick	0.3023	0.604	70.65	908.8	1826.3	133	78811786	0.6915	0.5231
K0090901_1506	PA0977-CW	ERR1939391	Fingerprick	0.5691	0.1942	10.42	858.4	2192.1	148	29037363	0.1952	0.494
K0090903_1512	PA1315-Cw	ERR2299382	Fingerprick	0.042	0.9309	113.56	661.6	1024.4	147	23097837	0.8469	0.8774
K0090903_1605	PA1362-Cw	ERR2299396	Fingerprick	0.0164	0.9755	345.28	541.3	471.2	146	73332362	0.9904	0.901
K0090903_1607	SPT21963	ERR2496655	Fingerprick	0.7565	0.1045	16.07	327.4	1053.8	132	71558307	0.9985	0.621
K0101005_1512	PA1336-Cw	ERR2299401	Fingerprick	0.0402	0.95	257.64	591.8	607.8	146	52169494	0.9692	0.8889
K0101005_1701	SPT21806	ERR2506041	Venous blood	0.4908	0.376	45.41	566.1	992.4	135	47398280	0.9057	0.6532
K0101005_1702	SPT21854	ERR2506084	Venous blood	0.9578	0.0121	3.12	523.2	890.3	150	1209595	0.0619	0.7067
K0101007_1412	PA1052-CW	ERR1939306	Fingerprick	0.0501	0.9324	151.21	588.8	933.5	141	36934164	0.9912	0.7556
K0111111_1611	SPT21714	ERR2436044	Venous blood	0.0143	0.9856	177.74	585.9	500.2	147	28442238	0.9921	0.9221
K0141403_1504	PA1061-CW	ERR1939319	Fingerprick	0.0472	0.9378	174.17	535.7	458.3	146	30607749	0.9895	0.8718
K0141403_1511	PA1423-Cw	ERR2299411	Fingerprick	0.1797	0.5172	13.56	1709.3	2970	126	11992500	0.9084	0.2162
K0141403_1512	PA1314-Cw	ERR2299379	Fingerprick	0.3864	0.1558	3.55	569.5	882.1	150	2754850	0.156	0.8303
K0161601_1506	PA0981-CW	ERR1939372	Fingerprick	0.8217	0.0859	11.7	427	1558.6	149	27028889	0.2153	0.8366
K0161621_1506	PA1045-CW	ERR1939315	Fingerprick	0.426	0.3434	23.3	511.1	630	150	14774917	0.2418	0.904
K0171716_1612	SPT21778	ERR2436081	Fingerprick	0.0306	0.9578	198.96	748.1	1038	147	33587419	0.994	0.9238
K0171716_1701	SPT21841	ERR2506073	Fingerprick	0.0427	0.9468	217.08	652.6	556.6	143	44597381	0.9911	0.7941
K0171716_1702	SPT21880	ERR2506104	Fingerprick	0.1502	0.7209	98.18	929.6	1352.3	147	25466730	0.9884	0.8762
K0171716_1703	SPT21957	ERR2496652	Fingerprick	0.1127	0.7008	18.91	1071.4	2422	141	99365436	0.3614	0.6048
K0171719_1701	SPT21842	ERR2506074	Fingerprick	0.3901	0.4594	39.33	480.7	1583.3	117	101752186	0.8841	0.6301
K0171719_1702	SPT21882	ERR2506106	Fingerprick	0.9499	0.0108	4.74	7430.3	1891.9	150	28563922	0.0397	0
K0171722_1512	PA1332-Cw	ERR2299381	Fingerprick	0.041	0.9493	248.55	592.7	607.5	145	60135119	0.9586	0.8589
K0171728_1512	PA1323-Cw	ERR2299380	Fingerprick	0.0538	0.9112	101.07	643.7	975.4	148	20997554	0.8191	0.9034
K0171732_1512	PA1324-Cw	ERR2299383	Fingerprick	0.0462	0.9424	267.04	573.4	582.9	146	54109390	0.9561	0.8884
K0171738_1412	PA1050-CW	ERR1939321	Fingerprick	0.0464	0.9407	176.48	525.2	449.9	146	31916721	0.989	0.8583
K0181809_1512	PA1331-Cw	ERR2299378	Fingerprick	0.0176	0.9637	152.67	544.7	479.6	147	25194722	0.9781	0.9114
K0181810_1705	SPT21924	ERR2496648	Venous blood	0.0532	0.9266	214.35	805.5	1151.3	139	91189152	0.9428	0.7064
K0191907_1511	PA1438-Cw	ERR2299412	Fingerprick	0.7161	0.0555	4.91	385.5	1101.9	150	2175961	0.5019	0.8998
K0202002_1512	PA1318-Cw	ERR2299388	Fingerprick	0.0171	0.9781	286.49	552.4	538.8	147	54196342	0.9889	0.9182
K0212102_1512	PA1327-Cw	ERR2299387	Fingerprick	0.4334	0.2222	9	610.7	1105.9	147	7561231	0.3183	0.8175
K0212110_1512	PA1316-Cw	ERR2299384	Fingerprick	0.0314	0.9508	213.88	641.2	964.9	147	38634552	0.9567	0.9097
K0222201_1612	SPT21745	ERR2524271	Venous blood	0.4562	0.3499	23.76	633.2	1874.1	140	56682478	0.8726	0.7214
K0222202_1504	PA1069-CW	ERR1939303	Fingerprick	0.5931	0.15	17.33	707.7	1347.3	136	37949345	0.9938	0.7077
K0222208_1611	SPT21712	ERR2436042	Venous blood	0.0252	0.9628	176.44	630.6	623.8	147	28690800	0.9931	0.8996
K0222213_1612	SPT21753	ERR2436071	Venous blood	0.3998	0.4773	81.34	994.6	1412.8	146	46655424	0.9916	0.8618
K0222213_1701	SPT21834	ERR2506066	Venous blood	0.2764	0.6129	88.63	713	1079.5	135	53734530	0.9859	0.6292
K0222213_1702	SPT21849	ERR2506080	Venous blood	0.9661	0.0098	2.67	473.2	903.4	150	1204702	0.0516	0.6315
K0222213_1705	SPT21931	ERR2496631	Fingerprick	0.7729	0.253	24.72	622.4	1938.3	140	84763474	0.8458	0.6271
K0232412_1701	SPT21805	ERR2506040	Venous blood	0.0909	0.8348	98.6	685.9	1050.1	137	41239660	0.998	0.7093
K0232412_1703	SPT21943	ERR2496638	Venous blood	0.9089	0.0119	2.71	537.8	990.2	150	1010529	0.1013	0.8245
K0242518_1412	PA0799-CW	ERR1939380	Fingerprick	0.7056	0.1509	11.61	755.8	1683	146	13682142	0.3076	0.4048
K0252612_1506	PA1005-CW	ERR1939287	Fingerprick	0.9532	0.0316	12.32	4908.5	3525.5	149	33091784	0.0528	0
K0252613_1511	PA1436-Cw	ERR2299426	Fingerprick	0.5274	0.2384	15.74	364.7	1511.5	145	30979803	0.3236	0.5389
K0252713_1512	PA1319-Cw	ERR2299390	Fingerprick	0.0816	0.8284	30.26	588.7	926.5	148	9504770	0.5985	0.8533
K0252715_1506	PA0979-CW	ERR1939394	Fingerprick	0.7191	0.118	9.32	1384.1	2859.2	148	32684647	0.1672	0.5793
K0252717_1512	PA1337-Cw	ERR2299404	Fingerprick	0.0627	0.8927	110.55	610	656.4	148	39969313	0.5291	0.8755
K0252805_1506	PA0982-CW	ERR1939376	Fingerprick	0.7909	0.1118	12.31	469.2	1543.6	149	28594918	0.142	0.7448
K0252808_1611	SPT21684	ERR2436103	Venous blood	0.1466	0.7552	104.1	875.3	1234.4	146	40132824	0.973	0.7983
K0252808_1701	SPT21840	ERR2506072	Fingerprick	0.0495	0.933	167.88	714.7	620.2	146	45470752	0.7723	0.8126
K0252808_1702	SPT21881	ERR2506105	Fingerprick	0.8859	0.0555	19.39	429.7	1455.1	132	44836883	0.9984	0.6356
K0262902_1511	PA1452-Cw	ERR2299415	Fingerprick	0.0211	0.973	303.33	541.5	487.4	146	56200454	0.9701	0.9102
K0262913_1611	SPT21716	ERR2436046	Fingerprick	0.05	0.9152	150.57	798.1	1177.3	147	30415022	0.9714	0.8986
K0262922_1612	SPT21750	ERR2436069	Venous blood	0.0345	0.9561	225.37	679.7	655.7	146	37358056	0.9933	0.8918
K0262922_1702	SPT21851	ERR2506082	Venous blood	0.3502	0.1591	3.44	576	479.4	150	1753937	0.2285	0.9035
K0262922_1704	SPT21885	ERR2506109	Venous blood	0.0516	0.9271	166.26	809.8	1086.4	146	31063040	0.9679	0.8637
K0262922_1705	SPT21906	ERR2541884	Venous blood	0.047	0.9421	211.52	701.4	769	146	41709050	0.9723	0.8684
K0262935_1612	SPT21747	ERR2524272	Venous blood	0.4596	0.2728	18.91	658.1	1173.6	148	35705381	0.7977	0.8845
K0262935_1701	SPT21802	ERR2506038	Venous blood	0.9639	0.01	2.75	310	344.8	150	1458625	0.0555	0.7092
K0262940_1511	PA1437-Cw	ERR2299428	Fingerprick	0.0548	0.9163	143.94	553	513	140	40495400	0.9207	0.7553
K0262940_1512	PA1313-Cw	ERR2299376	Fingerprick	0.0395	0.9451	162.25	559.8	597.8	147	28246273	0.9359	0.9041
K0262940_1702	SPT21853	ERR2506083	Venous blood	0.9064	0.0056	1.94	473.5	502.8	150	1079674	0.0559	0.7404
K0262940_1703	SPT21941	ERR2496636	Venous blood	0.3733	0.2396	5.7	817.2	1166.2	149	1767991	0.3741	0.8879
K0262940_1704	SPT21884	ERR2506108	Venous blood	0.0808	0.838	110.79	766.5	750.9	143	50050468	0.9599	0.6993
K0263001_1506	PA0991-CW	ERR1939289	Fingerprick	0.9665	0.0158	8.57	2507.7	3420.5	150	25312705	0.0125	0
K0263004_1511	PA1391-Cw	ERR2299405	Fingerprick	0.0398	0.9345	122.02	571	510.8	141	26609385	0.99	0.732
K0263004_1512	PA1317-Cw	ERR2299386	Fingerprick	0.0319	0.9573	280.05	594.4	573.8	147	54460529	0.9878	0.8992
K0263008_1612	SPT21751	ERR2436070	Venous blood	0.1987	0.6576	75.38	759.1	1075.8	149	40170040	0.7622	0.9147
K0263008_1701	SPT21799	ERR2506037	Venous blood	0.4715	0.4562	96.33	920.7	1290	146	60563702	0.9914	0.863
K0263008_1703	SPT21940	ERR2496635	Venous blood	0.8333	0.019	2.67	606.6	1010.5	150	1058738	0.1329	0.8509
K0263008_1704	SPT21883	ERR2506107	Fingerprick	0.1544	0.7505	109.19	939.8	1199.7	145	43928284	0.9687	0.8102
K0263008_1705	SPT21905	ERR2541883	Venous blood	0.2955	0.6053	91.36	839.7	1201.8	146	34928191	0.8832	0.844
K0263111_1702	SPT21852	ERR2524276	Venous blood	0.8785	0.0593	5.68	317.9	935.9	150	3760998	0.1774	0.933
K0283320_1506	PA0976-CW	ERR1939388	Fingerprick	0.5689	0.242	33.53	721.6	1117.6	145	23871818	0.5934	0.6757
K0283406_1512	PA1320-Cw	ERR2299392	Fingerprick	0.0196	0.9645	254.68	545.5	514.1	147	47153030	0.9894	0.9121
K0323702_1611	SPT21735	ERR2436060	Venous blood	0.0381	0.9523	208.22	780.9	1088.5	147	34837922	0.9947	0.9117
K0323703_1701	SPT21812	ERR2506047	Venous blood	0.9005	0.012	2.36	644.5	1003.6	150	818923	0.0878	0.7511
K0323703_1704	SPT21886	ERR2506110	Venous blood	0.928	0.0057	2.1	1001.8	1285.8	150	971219	0.0628	0.5656
K0323705_1506	PA1025-CW	ERR1939311	Fingerprick	0.7047	0.0522	5.4	312.6	1060.5	150	27415779	0.0892	0.9405
K0323713_1506	PA1004-CW	ERR1939284	Fingerprick	0.9547	0.0268	9.84	2971.7	3612	150	26114257	0.0326	0.0083
K0323714_1506	PA1006-CW	ERR1939290	Fingerprick	0.9586	0.0208	9.13	1880.2	3218.2	150	31455926	0.0191	0.0078
K0323717_1506	PA0987-CW	ERR1939280	Fingerprick	0.9391	0.0338	8.88	472.5	1420.5	150	16727862	0.0677	0.8841
K0344032_1512	PA1321-Cw	ERR2299377	Fingerprick	0.0411	0.9439	151.57	573.2	578.5	146	24903426	0.99	0.8904
K0344103_1506	PA1016-CW	ERR1939285	Fingerprick	0.9722	0.0084	6.03	1645.4	3053.9	150	27960232	0.005	0.1017
K0364309_1511	PA1427-Cw	ERR2299400	Fingerprick	0.2217	0.5123	21.97	797	1387.9	147	18142244	0.4313	0.737
K0364311_1511	PA1376-Cw	ERR2299402	Fingerprick	0.0395	0.9335	133.3	602.5	551.1	142	26180251	0.9916	0.7831
K0364312_1607	SPT21967	ERR2496658	Venous blood	0.0457	0.9421	270.32	601.8	526	144	74083746	0.9806	0.8206
K0364314_1701	SPT21808	ERR2506043	Venous blood	0.0452	0.9426	223.09	850.8	1190.1	147	44372569	0.9933	0.9028
K0364319_1511	PA1426-Cw	ERR2299397	Fingerprick	0.0394	0.9473	186.21	513.9	584.1	140	44465226	0.9446	0.8163
K0364319_1612	SPT21759	ERR2436073	Venous blood	0.0397	0.9493	202.43	877.7	1161.5	146	35950245	0.9901	0.872
K0364323_1511	PA1435-Cw	ERR2299423	Fingerprick	0.2863	0.4496	24.42	402.6	1460.7	145	33483465	0.5091	0.6146
K0364324_1701	SPT21807	ERR2506042	Venous blood	0.1871	0.7153	97.72	774.4	1276.5	136	64147879	0.7913	0.6362
K0374406_1612	SPT21756	ERR2436072	Venous blood	0.0858	0.8431	120.25	880.7	1314.8	146	30883396	0.9936	0.8645
K0374406_1701	SPT21804	ERR2506039	Venous blood	0.2648	0.642	108.67	761.9	703.9	143	56878080	0.9896	0.7632
K0374406_1702	SPT21855	ERR2506085	Venous blood	0.879	0.0688	11.37	45.7	56.9	146	29818211	0.7083	0.7924
K0374408_1412	PA1048-CW	ERR1939318	Fingerprick	0.0398	0.9475	181.16	503.9	381.4	145	31463076	0.9855	0.8569
K0374408_1506	PA1032-CW	ERR1939317	Fingerprick	0.6265	0.0928	7.23	1266.1	2751.4	148	31538162	0.152	0.553
K0374413_1611	SPT21725	ERR2436053	Fingerprick	0.0181	0.9698	229.24	747.8	1060.2	147	38214894	0.9938	0.9215
K0374502_1412	PA1051-CW	ERR1939302	Fingerprick	0.0512	0.9333	159.54	513.9	529.8	142	33139443	0.9924	0.7988
K0374502_1612	SPT21769	ERR2436076	Venous blood	0.1294	0.8022	133.32	925.2	1222.6	145	42967513	0.9572	0.8085
K0384601_1701	SPT21811	ERR2506046	Venous blood	0.9169	0.0094	2.42	618.5	1002	150	865175	0.0778	0.7548
K0384601_1702	SPT21865	ERR2506092	Fingerprick	0.4137	0.4708	48.05	685	1726.6	127	73386756	0.7986	0.5775
K0384602_1512	PA1456-Cw	ERR2299419	Fingerprick	0.1122	0.7637	53.64	767.8	1207.8	143	23606505	0.6659	0.6191
K0384604_1511	PA1434-Cw	ERR2299420	Fingerprick	0.2558	0.5435	44.1	760.7	1071.4	144	15983093	0.6946	0.6536
K0384611_1701	SPT21810	ERR2506045	Venous blood	0.9562	0.0069	2.38	218.1	969.2	148	2205040	0.1596	0.6439
K0384611_1702	SPT21866	ERR2506093	Fingerprick	0.0491	0.9292	163.37	647.9	581	141	51455050	0.9162	0.7076
K0384611_1704	SPT21902	ERR2541881	Fingerprick	0.8001	0.1895	23.23	923.2	1363.2	146	41871039	0.9112	0.8587
K0384611_1705	SPT21918	ERR2541893	Fingerprick	0.7809	0.2289	31.06	927.1	1263.8	145	32042553	0.7078	0.7658
K0394906_1611	SPT21715	ERR2436045	Venous blood	0.0262	0.9629	177.93	624.8	539.6	147	28514295	0.9938	0.9019
K0394923_1506	PA1043-CW	ERR1939312	Fingerprick	0.557	0.1111	7.08	940.8	2401.9	145	35288807	0.213	0.5906
K0394938_1611	SPT21719	ERR2436048	Fingerprick	0.0328	0.9528	181.27	737.9	1042.4	147	29307931	0.9952	0.9227
K0405016_1611	SPT21727	ERR2436055	Fingerprick	0.0124	0.9823	213.94	652.5	528.6	147	34582027	0.9933	0.9248
K0415107_1506	PA0988-CW	ERR1939283	Fingerprick	0.9789	0.0071	7.27	2317.6	3473.6	150	28707568	0.0045	0.0416
K0415108_1701	SPT21846	ERR2506077	Fingerprick	0.2244	0.6874	105.95	629.9	1008.7	136	69042089	0.9442	0.6263
K0415108_1702	SPT21879	ERR2506103	Fingerprick	0.2852	0.5854	66.36	785.3	1390.8	137	53090970	0.7781	0.6042
K0425208_1512	PA1328-Cw	ERR2299389	Fingerprick	0.048	0.9253	166.74	645.1	955.8	147	28922468	0.9456	0.9102
K0425216_1511	PA1440-Cw	ERR2299414	Fingerprick	0.182	0.5527	26.9	625.7	1421.2	142	29131368	0.5672	0.4652
N0050505_1610	SPT21678	ERR2436101	Venous blood	0.4082	0.5165	79.82	696.1	578.6	141	42533169	0.9221	0.7003
N0131303_1612	SPT21791	ERR2436087	Venous blood	0.8815	0.0107	2.34	455.8	995.3	150	1673487	0.0707	0.8355
N0131303_1701	SPT21839	ERR2506071	Venous blood	0.0731	0.8693	147.81	882.8	1274.1	147	38767495	0.994	0.8768
N0131303_1705	SPT21926	ERR2496628	Venous blood	0.9058	0.1404	25.46	274.8	1263	148	11837513	0.5549	0.8092
N0131310_1611	SPT21704	ERR2436037	Venous blood	0.7422	0.1594	17.18	592.4	1882.9	133	63188833	0.8641	0.5425
N0131318_1611	SPT21705	ERR2436038	Venous blood	0.0487	0.9264	139.48	791.3	1190.4	147	24624489	0.9655	0.9019
N0131318_1612	SPT21792	ERR2506032	Venous blood	0.9802	0.0051	2.9	468.3	1394.9	150	1378515	0.034	0.5615
N0131318_1703	SPT21959	ERR2496654	Fingerprick	0.8967	0.0703	14.42	268	1296.4	149	76659361	0.1993	0.8634
N0131320_1610	SPT21679	ERR2436102	Venous blood	0.7225	0.1587	19.49	1764	3226.1	120	56086471	0.7414	0.5481
N0131323_1610	SPT21677	ERR2436100	Venous blood	0.1242	0.7651	89.85	652.8	739.4	143	25141776	0.9921	0.807
N0141403_1612	SPT21795	ERR2506034	Venous blood	0.1976	0.4874	10.21	784	1124.9	149	2908530	0.541	0.9123
P0010104_1611	SPT21734	ERR2436059	Venous blood	0.0453	0.9335	165.05	796.7	1215.8	147	28053271	0.9959	0.9048
P0010111_1610	SPT21670	ERR2436094	Venous blood	0.8785	0.0965	13.1	422.3	1551.4	145	29859021	0.3322	0.7072
P0010121_1611	SPT21698	ERR2524269	Venous blood	0.2988	0.4495	23.85	1040.3	1687.6	144	34934137	0.7414	0.7011
P0010123_1610	SPT21676	ERR2436099	Venous blood	0.822	0.183	26.24	774.3	2251.5	123	54142458	0.8245	0.5446
P0010126_1611	SPT21697	ERR2436031	Venous blood	0.6095	0.3184	53.59	866	1268.7	148	31294522	0.7835	0.8529
P0010127_1610	SPT21675	ERR2436098	Venous blood	0.0566	0.9069	136.59	712.4	734.9	146	30680243	0.9416	0.8397
P0010137_1610	SPT21673	ERR2436096	Venous blood	0.4083	0.5093	83.93	789.8	776.1	141	48396027	0.9259	0.7915
P0020206_1701	SPT21824	ERR2506058	Venous blood	0.0787	0.7702	17.93	787.6	1029.1	148	3427355	0.778	0.9048
P0020206_1702	SPT21863	ERR2506090	Venous blood	0.0426	0.9079	59.41	772.3	1052.3	148	11779725	0.782	0.9185
P0020206_1703	SPT21948	ERR2496643	Venous blood	0.0334	0.9492	92.88	756.9	1011.7	147	15668601	0.9257	0.9075
P0020206_1704	SPT21889	ERR2506113	Venous blood	0.2286	0.3636	5.9	753.6	986.9	149	1631908	0.4646	0.9114
P0020206_1705	SPT21909	ERR2541885	Venous blood	0.0323	0.9569	223.79	768.8	1030.3	146	38127859	0.9918	0.8933
P0020213_1612	SPT21793	ERR2506033	Venous blood	0.0332	0.95	113.38	756.9	965.1	148	18620197	0.9489	0.9159
P0020213_1701	SPT21813	ERR2506048	Venous blood	0.052	0.9023	62.47	808.6	1101.1	148	10355053	0.9182	0.9169
P0020213_1705	SPT21910	ERR2541886	Venous blood	0.0524	0.9267	142.2	652.2	632.1	146	31046711	0.8863	0.8518
P0020214_1701	SPT21816	ERR2506050	Venous blood	0.7585	0.011	1.93	682.7	976.3	150	969562	0.1049	0.828
P0020215_1701	SPT21817	ERR2506051	Venous blood	0.0849	0.7496	19.29	741.9	925.6	149	3841754	0.7402	0.9318
P0030304_1607	SPT21965	ERR2496656	Venous blood	0.0607	0.9178	219.54	541.6	592.9	140	102615006	0.9879	0.7641
P0050504_1611	SPT21724	ERR2436052	Fingerprick	0.0223	0.9665	177.97	744.9	1005.3	147	28477296	0.9948	0.921
P0050505_1611	SPT21701	ERR2436034	Fingerprick	0.9025	0.0863	17.03	478.1	1741.9	145	31297017	0.338	0.6701
P0050514_1611	SPT21732	ERR2436058	Fingerprick	0.0422	0.948	205.89	794.3	1118.5	147	35492744	0.9952	0.9113
P0050519_1703	SPT21949	ERR2496644	Venous blood	0.7837	0.0216	2.35	630	988	150	1399445	0.1018	0.8346
P0050519_1704	SPT21893	ERR2506117	Venous blood	0.9127	0.0072	2.19	536.7	900.3	150	1208318	0.0563	0.7264
P0050519_1705	SPT21923	ERR2496627	Venous blood	0.0722	0.8309	24.91	784.9	1103.4	148	4800239	0.7831	0.9149
P0060609_1611	SPT21713	ERR2436043	Venous blood	0.0266	0.9622	182.17	663.6	978.7	147	29254407	0.9909	0.925
P0060616_1611	SPT21737	ERR2436061	Venous blood	0.0125	0.988	412.73	717.3	980.5	147	91728383	0.9944	0.926
P0060620_1611	SPT21739	ERR2436063	Venous blood	0.0112	0.9865	187.96	717.1	966.6	147	30443739	0.9941	0.9187
P0060622_1611	SPT21738	ERR2436062	Venous blood	0.0253	0.9636	224.53	651.5	563.8	146	36475961	0.9949	0.8951
P0060623_1612	SPT21773	ERR2436078,ERR2524273	Venous blood	0.0217	0.9686	354.24	774.3	1035.5	147	74686393	0.9912	0.8916
P0060623_1701	SPT21820	ERR2506054	Venous blood	0.8879	0.025	4.75	373.4	425.2	150	1019048	0.331	0.9174
P0060623_1702	SPT21874	ERR2506098	Venous blood	0.0379	0.9161	55.54	741.6	954	148	9153971	0.9334	0.9187
P0060623_1703	SPT21946	ERR2496641	Venous blood	0.039	0.9424	68.89	723	963.8	147	11410954	0.9319	0.9213
P0060623_1704	SPT21899	ERR2541878	Venous blood	0.0561	0.8569	27.06	719.1	923.9	148	5156497	0.7978	0.9303
P0060623_1705	SPT21915	ERR2541891	Venous blood	0.0344	0.9563	233.61	658.1	592.2	146	39967308	0.9902	0.8812
P0070705_1611	SPT21722	ERR2436050	Fingerprick	0.1132	0.7923	110.98	865.4	1271.9	146	39793601	0.9235	0.8752
P0070707_1610	SPT21671	ERR2436095	Venous blood	0.2235	0.5811	45.71	526.6	1434.4	136	35000760	0.9911	0.632
P0070710_1607	SPT21966	ERR2496657	Venous blood	0.0462	0.9409	284.56	518.8	492.8	143	76771774	0.995	0.837
P0070711_1611	SPT21699	ERR2436032	Venous blood	0.7671	0.2291	28.96	783.3	1129.7	147	50104190	0.327	0.6051
P0070722_1612	SPT21774	ERR2436079	Venous blood	0.046	0.9422	190.66	797.5	1083.6	146	34118563	0.9937	0.8732
P0070722_1701	SPT21818	ERR2506052	Venous blood	0.0752	0.808	34.01	732.4	993.8	148	6030846	0.8347	0.9414
P0070722_1702	SPT21875	ERR2506099	Venous blood	0.0464	0.9349	170.06	825.8	1202.3	148	30301641	0.9952	0.9162
P0070722_1703	SPT21945	ERR2496640	Venous blood	0.9708	0.007	2.69	374.3	868.5	150	1335241	0.0535	0.7588
P0080802_1612	SPT21775	ERR2436080	Venous blood	0.7591	0.2628	23.48	1332.2	1729.9	146	41532602	0.8003	0.7325
P0080802_1705	SPT21936	ERR2496632	Fingerprick	0.8686	0.15	20.29	686.9	2148.3	146	54801583	0.427	0.7768
P0080805_1612	SPT21786	ERR2436083,ERR2524274	Venous blood	0.028	0.964	390.91	741.5	998.5	147	85403423	0.9923	0.8993
P0080805_1701	SPT21827	ERR2506060	Venous blood	0.5234	0.0508	2.4	713.2	966.4	150	989188	0.2095	0.8889
P0080805_1702	SPT21870	ERR2506094	Venous blood	0.8765	0.0077	2	475.3	461.1	150	1388145	0.0561	0.7488
P0080805_1704	SPT21898	ERR2541877	Venous blood	0.9397	0.0067	2.3	312.6	338	150	1431821	0.0587	0.7907
P0080805_1705	SPT21916	ERR2541892	Venous blood	0.0599	0.9063	146.63	775.6	1144.3	146	32743026	0.9326	0.8826
P0080806_1701	SPT21821	ERR2506055	Fingerprick	0.952	0.0266	5.8	231.6	358.1	150	1651564	0.2365	0.9127
P0080806_1705	SPT21937	ERR2496633	Fingerprick	0.6592	0.3292	45.59	714.7	608.2	140	43633383	0.9138	0.6886
P0080811_1703	SPT21952	ERR2496646	Venous blood	0.9769	0.0056	2.63	394.3	926.1	150	933814	0.051	0.7039
P0080811_1704	SPT21896	ERR2541875	Venous blood	0.9796	0.0051	2.62	224.5	307.9	150	1122942	0.0508	0.7575
P0080811_1705	SPT21911	ERR2541887	Venous blood	0.9701	0.0139	3.98	384.9	860.5	150	1080039	0.098	0.7906
P0080835_1701	SPT21823	ERR2506057	Venous blood	0.9751	0.0055	2.59	362.7	853.6	150	1063295	0.049	0.6756
P0080835_1705	SPT21938	ERR2496634	Fingerprick	0.7748	0.2195	21.03	411.7	1267.1	147	15379458	0.618	0.8786
P0080836_1612	SPT21788	ERR2436084	Venous blood	0.0354	0.9573	252.26	793.9	1063.2	146	43954408	0.9935	0.8904
P0080836_1701	SPT21833	ERR2506065	Venous blood	0.044	0.9448	202.91	846.7	1214.8	147	37228231	0.995	0.9053
P0080840_1611	SPT21709	ERR2436040	Venous blood	0.2464	0.5524	42.77	459	1024.2	134	35309328	0.997	0.6349
P0080842_1612	SPT21785	ERR2436082	Venous blood	0.0273	0.9603	227.21	768.1	994	147	37631381	0.9933	0.8994
P0080842_1701	SPT21819	ERR2506053	Venous blood	0.5985	0.0353	2.31	698.5	954	150	1179208	0.1558	0.8431
P0080842_1703	SPT21947	ERR2496642	Venous blood	0.139	0.6012	12.2	728.3	1063.6	148	2859487	0.6162	0.9072
P0080842_1704	SPT21887	ERR2506111	Venous blood	0.0391	0.9455	157.67	716.3	648.8	146	27208026	0.9934	0.8497
P0080842_1705	SPT21914	ERR2541890	Venous blood	0.052	0.9211	125.96	781.3	1108.1	146	21398178	0.9694	0.8887
P0080843_1611	SPT21710	ERR2436041	Fingerprick	0.0401	0.9504	171.73	621.6	479.9	146	27366579	0.9938	0.8862
P0080854_1611	SPT21708	ERR2524270	Venous blood	0.0193	0.9781	274.08	490.4	506.1	146	49280036	0.9921	0.9012
P0080857_1702	SPT21862	ERR2506089	Venous blood	0.2051	0.4128	6.81	730.3	956.8	149	2092888	0.4308	0.9225
P0080857_1703	SPT21951	ERR2496645	Venous blood	0.9834	0.0043	2.9	473.6	1352.6	150	1098919	0.0299	0.4403
P0080857_1705	SPT21912	ERR2541888	Venous blood	0.9076	0.0533	5.78	1661.3	1840	150	1362534	0.2613	0.5486
P0080880_1612	SPT21789	ERR2436085	Venous blood	0.0588	0.9144	158.54	863.2	1178.4	145	39802320	0.9487	0.8382
P0090904_1610	SPT21674	ERR2436097	Venous blood	0.7717	0.2496	24.12	1234.7	1371.2	148	17812481	0.6451	0.6568
P0090907_1612	SPT21772	ERR2436077	Venous blood	0.7973	0.1818	19.64	215	1162.7	148	39440794	0.3566	0.8187
P0090907_1701	SPT21832	ERR2506064	Venous blood	0.6948	0.3785	30.52	1878.7	2548.7	148	40935001	0.4915	0.5317
P0111104_1611	SPT21721	ERR2436049	Fingerprick	0.0187	0.9786	213.57	757.9	984	147	35044002	0.993	0.9227
P0111105_1612	SPT21790	ERR2436086	Venous blood	0.913	0.0788	9.91	244.8	849.5	150	8936528	0.4305	0.8379
P0111105_1701	SPT21845	ERR2506076	Fingerprick	0.2831	0.6378	103.67	790	824.3	145	47118139	0.8983	0.771
P0111106_1611	SPT21730	ERR2436056	Fingerprick	0.0172	0.9835	179.11	703.6	895.1	147	28596765	0.9915	0.9293
P0121204_1701	SPT21814	ERR2506049	Venous blood	0.3454	0.2878	8.3	813.3	1130	149	2030976	0.4583	0.9134
P0121204_1702	SPT21857	ERR2506086	Venous blood	0.7324	0.1004	11.93	210.7	1015	140	32974672	0.9647	0.7709
P0121204_1703	SPT21944	ERR2496639	Venous blood	0.3461	0.2535	5.36	740.8	1078.5	150	1918991	0.3612	0.8763
P0121204_1704	SPT21891	ERR2506115	Venous blood	0.2969	0.4297	18.61	736.9	1184.4	147	3938321	0.6099	0.8434
P0121204_1705	SPT21913	ERR2541889	Venous blood	0.1373	0.756	83.98	831	1164.2	146	20102882	0.7915	0.8499
