# Supplementary material for: Household clustering and seasonal genetic variation of Plasmodium falciparum at the community-level in The Gambia
Source: eLife. 2025 May 27;13:RP103047. doi: 10.7554/eLife.103047 (PMC12113269; doi:10.7554/eLife.103047)
Supplement: Supplementary file 6. [file elife-103047-supp6.xlsx]

## Sheet: TS6 - COI (barcodes)
Barcode_ID	Proportion of heterozygous loci
J0010103_1412	0.0120482
J0010107_1511	0
J0010112_1511	0.115385
J0010118_1506	0.119048
J0010120_1412	0.166667
J0010129_1412	0
J0020202_1412	0
J0020208_1412	0.0833333
J0020301_1412	0.153846
J0020302_1506	0
J0020310_1512	0
J0020313_1412	0
J0020322_1511	0.0697674
J0030406_1701	0
J0030406_1702	0.011236
J0030406_1704	0
J0030406_1705	0
J0030407_1512	0
J0030409_1610	0
J0030417_1412	0.075
J0040504_1511	0
J0050605_1511	0
J0050607_1412	0
J0050611_1611	0
J0050616_1512	0
J0050617_1611	0.0449438
J0050618_1610	0
J0060701_1511	0.125
J0070804_1610	0.0163934
J0080906_1511	0
J0091005_1603	0
J0101103_1701	0
J0101103_1702	0
J0101103_1703	0
J0101103_1704	0
J0101103_1705	0.06
J0111208_1610	0
J0111209_1412	0
J0111211_1412	0
J0121309_1412	0
J0131403_1511	0
J0131404_1511	0
J0131406_1512	0
J0141503_1511	0.146067
J0141506_1506	0
J0141506_1511	0.207792
J0141509_1412	0
J0151608_1701	0
J0151608_1703	0
J0151608_1704	0.314815
J0151609_1512	0
J0151612_1511	0.348315
J0151616_1412	0
J0161702_1603	0.1875
J0161708_1412	0
J0161711_1603	0
J0171802_1611	0.0224719
J0171803_1511	0
J0171804_1412	0.2
J0171804_1610	0
J0171805_1611	0.0909091
J0171806_1511	0
J0181907_1412	0.0212766
J0181910_1511	0
J0181911_1611	0.0681818
J0181912_1412	0.0615385
J0202107_1412	0
J0212203_1412	0.17284
J0222301_1511	0
J0222302_1701	0
J0222306_1412	0
J0232404_1511	0
J0232410_1511	0.123077
J0242509_1611	0
J0242517_1611	0.0434783
J0242520_1412	0
J0252609_1412	0
J0252610_1611	0.0238095
J0252620_1511	0.06
J0262707_1412	0
J0262707_1506	0
J0262710_1511	0
J0262712_1412	0
J0262723_1511	0
J0262731_1412	0.0344828
J0262739_1412	0.142857
J0262744_1611	0
J0272802_1412	0
J0272803_1512	0.41573
J0272804_1511	0
J0272805_1412	0
J0272809_1611	0
J0272809_1612	0.0224719
J0272810_1506	0
J0272812_1611	0.0561798
J0272813_1610	0
J0272813_1611	0
J0272813_1612	0
J0272813_1701	0
J0272813_1702	0
J0272813_1703	0
J0272813_1704	0
J0272813_1705	0
J0272815_1611	0
J0272815_1701	0
J0272815_1702	0
J0272815_1703	0
J0272815_1704	0.232143
J0272815_1705	0.0350877
J0282915_1511	0
J0282916_1701	0.136364
J0282916_1702	0
J0282916_1703	0
J0282916_1704	0
J0282916_1705	0
K0010101_1611	0
K0010105_1412	0.223684
K0010105_1504	0
K0010105_1506	0
K0010105_1607	0
K0020203_1511	0
K0020204_1512	0
K0022008_1512	0.159091
K0030301_1504	0.0116279
K0030302_1511	0
K0030302_1512	0
K0030302_1610	0
K0030302_1611	0.159091
K0030302_1612	0
K0030303_1511	0
K0030303_1512	0.159091
K0030303_1603	0.15
K0030303_1605	0.0114943
K0030303_1607	0
K0030303_1612	0
K0030305_1511	0
K0050502_1512	0.0175439
K0050508_1603	0
K0050512_1611	0
K0050516_1511	0
K0060609_1511	0.0447761
K0060609_1605	0
K0060614_1511	0
K0060617_1511	0.150685
K0060617_1512	0.280899
K0060617_1603	0
K0060617_1605	0.302632
K0060617_1607	0
K0070713_1610	0
K0070714_1611	0
K0080809_1612	0
K0080809_1702	0
K0090903_1511	0.111111
K0090903_1512	0.0674157
K0090903_1603	0.125
K0090903_1605	0
K0090903_1607	0
K0090903_1610	0
K0090905_1607	0
K0090906_1504	0.268293
K0090906_1506	0
K0101005_1512	0
K0101005_1702	0
K0101007_1412	0.0114943
K0111111_1611	0
K0141403_1504	0
K0141403_1506	0
K0141403_1511	0
K0141403_1512	0
K0141404_1511	0.0704225
K0151503_1412	0.17284
K0151508_1612	0
K0151509_1610	0
K0151511_1610	0
K0151512_1412	0
K0161621_1506	0
K0171707_1412	0.25
K0171716_1612	0
K0171716_1701	0
K0171716_1702	0
K0171716_1703	0
K0171719_1701	0
K0171719_1705	0.211538
K0171722_1512	0
K0171723_1412	0.183333
K0171724_1611	0
K0171728_1512	0
K0171728_1605	0
K0171730_1603	0.0625
K0171732_1511	0
K0171732_1512	0
K0171732_1612	0
K0171738_1412	0
K0171742_1612	0.0784314
K0171742_1701	0
K0181809_1512	0.0113636
K0181810_1412	0.211268
K0181810_1612	0
K0181810_1705	0.0120482
K0191907_1511	0.125
K0202002_1512	0
K0202008_1605	0
K0212102_1512	0
K0212109_1504	0
K0212109_1506	0
K0212110_1512	0
K0212205_1603	0
K0222204_1506	0.1
K0222208_1611	0
K0222213_1612	0
K0222213_1701	0.016129
K0222213_1702	0.0833333
K0222213_1705	0.111111
K0222315_1511	0
K0232412_1612	0
K0232412_1701	0
K0232412_1703	0
K0232412_1704	0.0754717
K0232412_1705	0
K0242508_1412	0.121951
K0242508_1512	0
K0242508_1605	0.0533333
K0242508_1607	0
K0242512_1607	0
K0242515_1412	0
K0252706_1506	0.111111
K0252713_1512	0.0422535
K0252717_1511	0
K0252717_1512	0
K0252724_1412	0.135135
K0252808_1611	0.0135135
K0252808_1701	0
K0252808_1702	0
K0262902_1511	0
K0262913_1611	0.0952381
K0262922_1612	0
K0262922_1701	0.111111
K0262922_1702	0
K0262922_1703	0
K0262922_1704	0
K0262922_1705	0
K0262932_1611	0
K0262935_1612	0
K0262935_1702	0.0754717
K0262939_1412	0.1
K0262940_1511	0.0116279
K0262940_1512	0
K0262940_1603	0
K0262940_1605	0
K0262940_1612	0
K0262940_1701	0.0892857
K0262940_1702	0.0677966
K0262940_1703	0
K0262940_1704	0.012987
K0262941_1702	0.097561
K0262941_1705	0.132075
K0263004_1511	0
K0263004_1512	0
K0263004_1603	0
K0263008_1612	0
K0263008_1702	0
K0263008_1703	0
K0263008_1704	0
K0263008_1705	0
K0263111_1612	0
K0263111_1705	0.0769231
K0273207_1511	0
K0273207_1605	0
K0283310_1511	0
K0283406_1512	0.101124
K0303507_1603	0.302632
K0303507_1605	0
K0303507_1607	0
K0323702_1611	0
K0323703_1701	0
K0323703_1704	0.265306
K0323719_1511	0
K0323725_1511	0
K0323730_1511	0.0606061
K0344032_1512	0
K0344102_1511	0
K0344111_1511	0
K0364309_1511	0
K0364311_1511	0
K0364312_1511	0
K0364312_1607	0.0344828
K0364312_1612	0
K0364314_1612	0
K0364314_1701	0
K0364319_1511	0
K0364319_1612	0
K0364324_1612	0.0612245
K0364324_1701	0.0138889
K0364329_1511	0
K0374406_1612	0
K0374406_1701	0
K0374406_1702	0.259259
K0374406_1705	0.0877193
K0374408_1412	0.179775
K0374413_1611	0.386364
K0374502_1412	0
K0374502_1612	0.0135135
K0374502_1705	0.0677966
K0384601_1701	0
K0384601_1702	0
K0384602_1512	0
K0384604_1511	0
K0384611_1612	0.0377358
K0384611_1701	0
K0384611_1702	0
K0394906_1611	0
K0394917_1611	0
K0394923_1610	0
K0394934_1610	0
K0394938_1611	0
K0405016_1611	0
K0415108_1701	0
K0415108_1702	0.0357143
K0415109_1603	0.153846
K0425208_1512	0
K0425208_1605	0.269231
K0425216_1511	0
N0050505_1610	0
N0111111_1607	0
N0111112_1610	0.0681818
N0111114_1611	0.0983607
N0121205_1611	0
N0131303_1612	0.0392157
N0131303_1701	0
N0131303_1703	0
N0131303_1705	0.0727273
N0131310_1611	0
N0131318_1611	0.126437
N0131318_1701	0.313725
N0131323_1610	0.0512821
N0141403_1612	0
P0010104_1611	0.159091
P0010112_1611	0.22807
P0010116_1607	0
P0010121_1607	0
P0010121_1611	0
P0010126_1611	0
P0010127_1610	0.104651
P0010137_1610	0
P0020206_1607	0
P0020206_1701	0.0853659
P0020206_1702	0.126437
P0020206_1703	0.287356
P0020206_1704	0.0338983
P0020206_1705	0.0114943
P0020208_1607	0
P0020213_1612	0
P0020213_1701	0
P0020213_1704	0
P0020213_1705	0
P0020214_1607	0.109091
P0020214_1612	0
P0020214_1701	0
P0020215_1607	0
P0020215_1612	0
P0020215_1701	0
P0030304_1607	0.0823529
P0050504_1611	0
P0050514_1611	0
P0050519_1701	0
P0050519_1703	0
P0050519_1704	0.220339
P0050519_1705	0.0121951
P0060606_1607	0.218182
P0060609_1611	0
P0060616_1611	0.011236
P0060620_1611	0.204545
P0060622_1611	0
P0060623_1607	0
P0060623_1612	0.215909
P0060623_1701	0.08
P0060623_1702	0.116279
P0060623_1703	0
P0060623_1704	0.0365854
P0060623_1705	0.134831
P0070701_1611	0
P0070705_1611	0.0779221
P0070707_1610	0
P0070710_1607	0.0909091
P0070711_1611	0
P0070722_1612	0
P0070722_1701	0
P0070722_1702	0
P0070724_1610	0.115385
P0080805_1612	0
P0080805_1701	0
P0080805_1702	0
P0080805_1704	0
P0080805_1705	0
P0080811_1701	0
P0080811_1703	0.0943396
P0080811_1704	0.111111
P0080824_1607	0
P0080835_1705	0.132075
P0080836_1612	0
P0080836_1701	0
P0080840_1611	0
P0080842_1607	0.0677966
P0080842_1612	0
P0080842_1701	0.0689655
P0080842_1703	0.056338
P0080842_1704	0.215909
P0080842_1705	0.0568182
P0080843_1611	0
P0080854_1611	0
P0080857_1702	0.0294118
P0080858_1607	0
P0080867_1607	0
P0080880_1612	0.0232558
P0080880_1702	0.181818
P0090904_1610	0
P0090907_1701	0
P0111104_1611	0
P0111105_1701	0
P0111106_1611	0
P0121204_1612	0
P0121204_1701	0
P0121204_1703	0
P0121204_1704	0
P0121204_1705	0
