# Supplementary material for: Household clustering and seasonal genetic variation of Plasmodium falciparum at the community-level in The Gambia
Source: eLife. 2025 May 27;13:RP103047. doi: 10.7554/eLife.103047 (PMC12113269; doi:10.7554/eLife.103047)
Supplement: Supplementary file 7. [file elife-103047-supp7.xlsx]

## Sheet: TS7 - COI (genomes)
Genome_ID	SNPs with > 5 reads over 27577 SNPs	Fws	Proportion of heterozygous loci
J0010103_1412	26314	0.872129	0.0224817
J0020302_1506	27124	0.976802	0.000921863
J0030406_1701	26920	0.985516	0.000668698
J0030406_1702	27180	0.966969	0.00320112
J0030406_1705	26309	0.997703	0.000152045
J0030409_1610	27291	0.976303	0.0013924
J0050607_1412	26023	0.990899	0.000730123
J0050611_1611	27526	0.989713	0.000980926
J0050617_1611	27447	0.692044	0.0311406
J0060701_1511	27459	0.777008	0.050224
J0070804_1610	16829	0.943849	0.0117171
J0101103_1701	27322	0.98281	0.00215999
J0101103_1702	27143	0.977948	0.00117972
J0101103_1703	7022	0.995952	0.00014243
J0111201_1412	9287	0.996285	0.000861698
J0111208_1610	26889	0.99176	0.000632323
J0131403_1511	27503	0.981967	0.00141818
J0131406_1512	26144	0.974132	0.0016835
J0141503_1511	27235	0.658037	0.0731914
J0151608_1701	24977	0.992659	0.000640666
J0151612_1511	27546	0.501752	0.0934868
J0171802_1611	27416	0.886956	0.011784
J0171804_1610	17479	0.995661	0.000343308
J0171805_1611	27109	0.772063	0.0361624
J0171806_1511	26923	0.986933	0.000520021
J0181911_1611	26758	0.84475	0.0296515
J0242509_1611	27560	0.983675	0.0021045
J0242517_1611	20284	0.716061	0.0525427
J0262707_1412	27125	0.987151	0.00147493
J0262707_1506	6140	0.997977	0
J0262723_1511	27395	0.986621	0.00131411
J0262731_1412	26201	0.855549	0.0380796
J0272803_1512	27555	0.429475	0.149857
J0272804_1511	27111	0.97986	0.00103283
J0272809_1611	19077	0.993592	0.000262151
J0272809_1612	27473	0.910377	0.0125965
J0272812_1611	27514	0.877452	0.0288227
J0272813_1610	10049	0.99206	0.00109485
J0272813_1611	27410	0.983551	0.00251733
J0272813_1612	27517	0.983395	0.00225315
J0272813_1701	27511	0.9836	0.0019992
J0272813_1702	27501	0.983793	0.0022181
J0272813_1703	25872	0.991126	0.000386967
J0272813_1705	27342	0.983444	0.0019752
J0272815_1611	26833	0.986525	0.00123006
J0272815_1701	27479	0.9833	0.00221988
J0272815_1702	26113	0.987535	0.000842557
J0272815_1703	27168	0.986771	0.00195104
J0282915_1511	7471	0.93082	0.00456989
J0282916_1701	27309	0.749762	0.0618772
J0282916_1702	27422	0.957403	0.00291747
J0282916_1703	20713	0.906639	0.0107715
J0282916_1705	12063	0.986615	0.00149278
K0010101_1611	26855	0.993166	0.000484171
K0010105_1506	23779	0.919679	0.0120111
K0022008_1512	27379	0.765232	0.0538239
K0030301_1504	21699	0.936122	0.0120437
K0030302_1512	20892	0.946788	0.00168075
K0030302_1610	26933	0.98019	0.000519905
K0030302_1611	26707	0.661733	0.0815637
K0030303_1512	27258	0.63867	0.0618136
K0030303_1605	27498	0.840918	0.0195651
K0030303_1612	27461	0.990046	0.000946832
K0050502_1512	8451	0.862174	0.0142073
K0050512_1611	27512	0.993896	0.000726956
K0060617_1512	27479	0.515415	0.114999
K0060617_1603	18148	0.943016	0.00265413
K0070714_1611	27390	0.98163	0.0023733
K0080809_1702	11428	0.93411	0.0106942
K0090903_1512	27229	0.808414	0.0344283
K0090903_1605	27526	0.968073	0.00156216
K0101005_1512	27477	0.983984	0.00196528
K0101005_1701	5604	0.953424	0.00625559
K0101007_1412	26236	0.964183	0.00286139
K0111111_1611	27522	0.983644	0.00123538
K0141403_1504	27095	0.985758	0.00047997
K0141403_1511	11934	0.99895	0
K0161621_1506	7317	0.982108	0.00136949
K0171716_1612	27449	0.991203	0.00109294
K0171716_1701	27244	0.991296	0.000734376
K0171716_1702	20105	0.992256	0.00104478
K0171716_1703	15864	0.992227	0.000378358
K0171719_1701	5807	0.933864	0.0096635
K0171722_1512	27325	0.931476	0.00662567
K0171728_1512	27157	0.938314	0.00707339
K0171732_1512	27351	0.984276	0.00146247
K0171738_1412	27121	0.986872	0.00103249
K0181809_1512	27463	0.813974	0.00517078
K0181810_1705	25567	0.938855	0.00776075
K0202002_1512	27544	0.980594	0.00163381
K0212110_1512	27472	0.974924	0.00167443
K0222208_1611	27441	0.989649	0.0012392
K0222213_1612	10608	0.993156	0.000471387
K0222213_1701	12553	0.921599	0.0124511
K0232412_1701	22464	0.990492	0.000845948
K0252713_1512	25886	0.792946	0.0384556
K0252717_1512	25595	0.980289	0.000547324
K0252808_1611	18739	0.909799	0.0143277
K0252808_1701	26736	0.973533	0.0026934
K0262902_1511	27543	0.988345	0.00123443
K0262913_1611	26166	0.852673	0.0252075
K0262922_1612	27393	0.990779	0.000839692
K0262922_1704	26922	0.988576	0.00037154
K0262922_1705	27136	0.993363	0.00047921
K0262940_1511	25211	0.979564	0.00067471
K0262940_1512	27308	0.984954	0.000952137
K0262940_1703	4914	0.996673	0
K0262940_1704	21199	0.85891	0.0213009
K0263004_1511	26319	0.967699	0.000608226
K0263004_1512	27461	0.983861	0.00160227
K0263008_1612	16666	0.995939	6.00096e-05
K0263008_1701	10535	0.995186	0.000284792
K0263008_1704	18411	0.996441	0.000162955
K0263008_1705	13727	0.996856	0.000218563
K0283406_1512	27523	0.785082	0.0569705
K0323702_1611	27397	0.986832	0.00142351
K0344032_1512	27278	0.864601	0.0129065
K0364309_1511	8372	0.799864	0.0138585
K0364311_1511	26368	0.972153	0.000607026
K0364312_1607	27051	0.877464	0.00935616
K0364314_1701	27295	0.986354	0.0021982
K0364319_1511	27086	0.977863	0.00103413
K0364319_1612	27175	0.949814	0.00371692
K0364324_1701	15844	0.882617	0.0230438
K0374406_1612	23122	0.996712	0.000173003
K0374406_1701	14145	0.943598	0.0110388
K0374408_1412	27101	0.587101	0.100181
K0374413_1611	27475	0.36438	0.140744
K0374502_1412	26404	0.990529	0.00022729
K0374502_1612	20729	0.965793	0.00598369
K0384601_1702	6696	0.955643	0.00628743
K0384602_1512	17405	0.944398	0.00518433
K0384604_1511	9270	0.965369	0.0014051
K0384611_1702	26210	0.98436	0.000572366
K0394906_1611	27504	0.989824	0.00101807
K0394938_1611	27433	0.987294	0.00116673
K0405016_1611	27529	0.773092	0.0102449
K0415108_1701	14950	0.915263	0.0152196
K0415108_1702	11085	0.929719	0.0128298
K0425208_1512	27377	0.963485	0.00179002
K0425216_1511	6983	0.865676	0.0101759
N0050505_1610	8905	0.947518	0.00876306
N0131303_1701	24936	0.992264	0.00128344
N0131318_1611	26380	0.786179	0.0422279
N0131323_1610	20416	0.87416	0.0209203
N0141403_1612	12534	0.996904	7.9783e-05
P0010104_1611	27069	0.646803	0.0743031
P0010121_1611	3832	0.886836	0.00870942
P0010126_1611	5313	0.997252	0
P0010127_1610	25515	0.668074	0.059867
P0010137_1610	10073	0.995025	0.000496426
P0020206_1701	23397	0.764767	0.0383205
P0020206_1702	26858	0.6374	0.0701283
P0020206_1703	27138	0.495872	0.111456
P0020206_1704	8681	0.830106	0.012864
P0020206_1705	27330	0.821452	0.00541708
P0020213_1612	27424	0.990443	0.00156797
P0020213_1701	26932	0.991291	0.00115143
P0020213_1705	26705	0.988484	0.00183493
P0020215_1701	22939	0.995833	0.000392379
P0030304_1607	25470	0.746696	0.0536987
P0050504_1611	27485	0.988189	0.000982354
P0050514_1611	27374	0.988979	0.00116899
P0050519_1705	24169	0.93542	0.00281924
P0060609_1611	27444	0.981672	0.00244134
P0060616_1611	27562	0.910099	0.00634932
P0060620_1611	27543	0.590563	0.0916518
P0060622_1611	27436	0.973268	0.0012757
P0060623_1612	27505	0.545407	0.0949818
P0060623_1702	27085	0.67329	0.055422
P0060623_1703	27188	0.985073	0.00080921
P0060623_1704	25651	0.835165	0.0204137
P0060623_1705	27350	0.837103	0.0448029
P0070705_1611	20964	0.800309	0.0360291
P0070707_1610	11053	0.972311	0.00461915
P0070710_1607	27048	0.7099	0.0415309
P0070722_1612	27176	0.988084	0.0011776
P0070722_1701	24492	0.992519	0.000163425
P0070722_1702	27253	0.989861	0.0012844
P0080805_1612	27546	0.985953	0.00159733
P0080805_1705	26004	0.976691	0.00261579
P0080836_1612	27405	0.989445	0.00116771
P0080836_1701	27422	0.990424	0.000948178
P0080840_1611	9473	0.992975	0
P0080842_1612	27483	0.969161	0.000618587
P0080842_1703	16408	0.807565	0.0278018
P0080842_1704	27209	0.631072	0.0947055
P0080842_1705	26431	0.857339	0.0308595
P0080843_1611	27464	0.987617	0.00189353
P0080854_1611	27532	0.989171	0.00119861
P0080857_1702	10619	0.741342	0.0385026
P0080880_1612	25998	0.92691	0.0120487
P0111104_1611	27560	0.989326	0.00159652
P0111105_1701	14005	0.94632	0.0096463
P0111106_1611	27514	0.988763	0.00163553
P0121204_1701	7402	0.996364	0.000135099
P0121204_1703	4934	0.99937	0
P0121204_1704	11747	0.995474	0.0001703
P0121204_1705	19307	0.996223	0.000155392
