# Supplementary material for: Household clustering and seasonal genetic variation of Plasmodium falciparum at the community-level in The Gambia
Source: eLife. 2025 May 27;13:RP103047. doi: 10.7554/eLife.103047 (PMC12113269; doi:10.7554/eLife.103047)
Supplement: Supplementary file 8. [file elife-103047-supp8.xlsx]

## Sheet: TS8 - DR markers (barcodes)
Barcode_ID	Protein	Position	WT Allele	Sample Alleles	Genotype
J0010103_1412	CRT	76	K	T,K	Mixed
J0010103_1412	DHFR	108	S	N	Resistant
J0010103_1412	DHPS	437	A	G	Resistant
J0010103_1412	MDR1	86	N	N	WT
J0010107_1506	DHFR	108	S	N	Resistant
J0010107_1511	CRT	76	K	K	WT
J0010107_1511	DHFR	108	S	N	Resistant
J0010107_1511	DHPS	437	A	A	WT
J0010112_1511	DHFR	108	S	N	Resistant
J0010112_1511	DHPS	437	A	A	WT
J0010129_1412	DHFR	108	S	S	WT
J0010129_1412	DHPS	437	A	G	Resistant
J0020202_1412	DHPS	437	A	G	Resistant
J0020208_1412	DHFR	108	S	S	WT
J0020208_1412	DHPS	437	A	G	Resistant
J0020301_1412	DHFR	108	S	N	Resistant
J0020301_1412	DHPS	437	A	A	WT
J0020302_1506	CRT	76	K	T	Resistant
J0020302_1506	DHFR	108	S	N	Resistant
J0020302_1506	DHPS	437	A	G	Resistant
J0020302_1506	MDR1	86	N	Y	Resistant
J0020310_1512	DHPS	437	A	A	WT
J0020313_1412	CRT	76	K	K	WT
J0020313_1412	DHFR	108	S	N	Resistant
J0020313_1412	MDR1	86	N	N	WT
J0020317_1412	DHFR	108	S	N	Resistant
J0020322_1511	DHFR	108	S	N	Resistant
J0020322_1511	DHPS	437	A	A	WT
J0030406_1701	CRT	76	K	T	Resistant
J0030406_1701	DHFR	108	S	N	Resistant
J0030406_1701	DHPS	437	A	A	WT
J0030406_1701	MDR1	86	N	Y	Resistant
J0030406_1702	CRT	76	K	T	Resistant
J0030406_1702	DHPS	437	A	G	Resistant
J0030406_1702	MDR1	86	N	Y	Resistant
J0030406_1704	CRT	76	K	T	Resistant
J0030406_1704	MDR1	86	N	Y	Resistant
J0030406_1705	CRT	76	K	T	Resistant
J0030406_1705	DHFR	108	S	N	Resistant
J0030406_1705	DHPS	437	A	A	WT
J0030406_1705	MDR1	86	N	Y	Resistant
J0030407_1512	DHFR	108	S	N	Resistant
J0030407_1512	DHPS	437	A	G	Resistant
J0030409_1610	CRT	76	K	T	Resistant
J0030409_1610	DHFR	108	S	N	Resistant
J0030409_1610	MDR1	86	N	N	WT
J0030417_1412	CRT	76	K	T	Resistant
J0030417_1412	DHFR	108	S	N	Resistant
J0030417_1412	DHPS	437	A	A	WT
J0030417_1412	MDR1	86	N	N	WT
J0040504_1511	DHFR	108	S	N	Resistant
J0050605_1511	DHFR	108	S	N	Resistant
J0050605_1511	DHPS	437	A	G	Resistant
J0050607_1412	CRT	76	K	T	Resistant
J0050607_1412	DHFR	108	S	N	Resistant
J0050607_1412	DHPS	437	A	G	Resistant
J0050607_1412	MDR1	86	N	N	WT
J0050611_1611	CRT	76	K	T	Resistant
J0050611_1611	DHFR	108	S	N	Resistant
J0050611_1611	DHPS	437	A	A	WT
J0050611_1611	MDR1	86	N	Y	Resistant
J0050616_1512	CRT	76	K	T	Resistant
J0050616_1512	DHFR	108	S	N	Resistant
J0050616_1512	DHPS	437	A	A	WT
J0050616_1512	MDR1	86	N	N	WT
J0050617_1611	CRT	76	K	T	Resistant
J0050617_1611	DHFR	108	S	N	Resistant
J0050617_1611	DHPS	437	A	A	WT
J0050617_1611	MDR1	86	N	N	WT
J0050618_1610	CRT	76	K	T	Resistant
J0050618_1610	DHFR	108	S	N	Resistant
J0060701_1511	CRT	76	K	T	Resistant
J0060701_1511	DHFR	108	S	N	Resistant
J0060701_1511	DHPS	437	A	A	WT
J0070804_1610	CRT	76	K	K	WT
J0070804_1610	DHFR	108	S	N	Resistant
J0080906_1511	CRT	76	K	T	Resistant
J0080906_1511	DHFR	108	S	N	Resistant
J0080906_1511	DHPS	437	A	A	WT
J0080906_1511	MDR1	86	N	N	WT
J0091005_1603	CRT	76	K	T	Resistant
J0091005_1603	DHFR	108	S	N	Resistant
J0091005_1603	DHPS	437	A	A	WT
J0091005_1603	MDR1	86	N	N	WT
J0101103_1701	CRT	76	K	T	Resistant
J0101103_1701	DHFR	108	S	N	Resistant
J0101103_1701	MDR1	86	N	N	WT
J0101103_1702	CRT	76	K	T	Resistant
J0101103_1702	MDR1	86	N	N	WT
J0101103_1703	CRT	76	K	T	Resistant
J0101103_1703	DHFR	108	S	S	WT
J0101103_1703	MDR1	86	N	N	WT
J0101103_1704	DHFR	108	S	N	Resistant
J0101103_1704	DHPS	437	A	A	WT
J0101103_1705	DHPS	437	A	A	WT
J0101103_1705	MDR1	86	N	N	WT
J0111208_1610	CRT	76	K	T	Resistant
J0111208_1610	MDR1	86	N	Y	Resistant
J0111209_1412	CRT	76	K	K	WT
J0111209_1412	DHFR	108	S	N	Resistant
J0111209_1412	DHPS	437	A	G	Resistant
J0111211_1412	CRT	76	K	K	WT
J0111211_1412	DHFR	108	S	N	Resistant
J0111211_1412	DHPS	437	A	G	Resistant
J0121309_1412	DHPS	437	A	G	Resistant
J0131404_1511	CRT	76	K	K	WT
J0131404_1511	DHFR	108	S	N	Resistant
J0131404_1511	DHPS	437	A	G	Resistant
J0131404_1511	MDR1	86	N	N	WT
J0131406_1512	DHFR	108	S	N	Resistant
J0131406_1512	DHPS	437	A	G	Resistant
J0131406_1512	MDR1	86	N	N	WT
J0141502_1412	DHFR	108	S	S	WT
J0141502_1412	DHPS	437	A	G	Resistant
J0141503_1511	CRT	76	K	T	Resistant
J0141503_1511	DHFR	108	S	N	Resistant
J0141503_1511	DHPS	437	A	G	Resistant
J0141503_1511	MDR1	86	N	Y	Resistant
J0141506_1506	CRT	76	K	K	WT
J0141506_1506	DHFR	108	S	N	Resistant
J0141506_1506	DHPS	437	A	G	Resistant
J0141506_1506	MDR1	86	N	N	WT
J0141506_1511	CRT	76	K	T,K	Mixed
J0141506_1511	DHFR	108	S	N	Resistant
J0141506_1511	DHPS	437	A	G	Resistant
J0141509_1412	DHFR	108	S	N	Resistant
J0141509_1412	DHPS	437	A	G	Resistant
J0141509_1412	MDR1	86	N	N	WT
J0151608_1701	CRT	76	K	T	Resistant
J0151608_1701	DHFR	108	S	N	Resistant
J0151608_1701	DHPS	437	A	A	WT
J0151608_1701	MDR1	86	N	Y	Resistant
J0151608_1703	MDR1	86	N	N	WT
J0151608_1704	DHFR	108	S	S	WT
J0151608_1704	DHPS	437	A	A	WT
J0151608_1704	MDR1	86	N	N	WT
J0151609_1512	DHFR	108	S	N	Resistant
J0151609_1512	DHPS	437	A	A	WT
J0151616_1412	DHFR	108	S	N	Resistant
J0151616_1412	DHPS	437	A	G	Resistant
J0151616_1412	MDR1	86	N	N	WT
J0161702_1603	CRT	76	K	K	WT
J0161702_1603	DHFR	108	S	N	Resistant
J0161702_1603	DHPS	437	A	A	WT
J0161702_1603	MDR1	86	N	N	WT
J0161706_1412	DHFR	108	S	S	WT
J0161706_1412	DHPS	437	A	G	Resistant
J0161708_1412	DHPS	437	A	G	Resistant
J0161708_1412	MDR1	86	N	N	WT
J0161710_1412	DHFR	108	S	S	WT
J0161710_1412	DHPS	437	A	G	Resistant
J0161711_1603	CRT	76	K	T	Resistant
J0161711_1603	DHFR	108	S	N	Resistant
J0161711_1603	DHPS	437	A	G	Resistant
J0161711_1603	MDR1	86	N	N	WT
J0171802_1611	DHFR	108	S	N	Resistant
J0171802_1611	DHPS	437	A	A	WT
J0171802_1611	MDR1	86	N	N	WT
J0171803_1511	CRT	76	K	K	WT
J0171803_1511	DHFR	108	S	N	Resistant
J0171803_1511	DHPS	437	A	A	WT
J0171804_1412	DHFR	108	S	S	WT
J0171804_1610	CRT	76	K	K	WT
J0171804_1610	DHFR	108	S	N	Resistant
J0171804_1610	MDR1	86	N	N	WT
J0171805_1611	CRT	76	K	T	Resistant
J0171805_1611	DHFR	108	S	N	Resistant
J0171805_1611	DHPS	437	A	A	WT
J0171805_1611	MDR1	86	N	N	WT
J0171806_1511	DHFR	108	S	N	Resistant
J0171806_1511	DHPS	437	A	G	Resistant
J0181910_1511	DHFR	108	S	N	Resistant
J0181911_1611	CRT	76	K	T	Resistant
J0181911_1611	DHFR	108	S	N	Resistant
J0181911_1611	MDR1	86	N	Y	Resistant
J0181912_1412	DHFR	108	S	S	WT
J0202102_1412	DHFR	108	S	N	Resistant
J0202107_1412	DHFR	108	S	N	Resistant
J0202107_1412	DHPS	437	A	G	Resistant
J0202107_1412	MDR1	86	N	N	WT
J0212203_1412	DHFR	108	S	N	Resistant
J0212203_1412	DHPS	437	A	G	Resistant
J0212203_1412	MDR1	86	N	Y	Resistant
J0212204_1412	DHPS	437	A	G	Resistant
J0212204_1412	MDR1	86	N	N	WT
J0222301_1511	CRT	76	K	T	Resistant
J0222301_1511	DHFR	108	S	N	Resistant
J0222301_1511	DHPS	437	A	G	Resistant
J0232404_1511	DHFR	108	S	N	Resistant
J0232404_1511	DHPS	437	A	G	Resistant
J0232404_1511	MDR1	86	N	N	WT
J0232410_1511	DHPS	437	A	G	Resistant
J0242509_1611	CRT	76	K	K	WT
J0242509_1611	DHFR	108	S	N	Resistant
J0242509_1611	DHPS	437	A	A	WT
J0242509_1611	MDR1	86	N	N	WT
J0242517_1611	CRT	76	K	T	Resistant
J0242517_1611	DHFR	108	S	N	Resistant
J0242517_1611	MDR1	86	N	N	WT
J0242520_1412	DHFR	108	S	N	Resistant
J0242520_1412	DHPS	437	A	G	Resistant
J0242520_1412	MDR1	86	N	N	WT
J0252609_1412	CRT	76	K	K	WT
J0252609_1412	DHFR	108	S	N	Resistant
J0252609_1412	DHPS	437	A	G	Resistant
J0252609_1412	MDR1	86	N	N	WT
J0252610_1611	DHFR	108	S	N	Resistant
J0252610_1611	DHPS	437	A	A	WT
J0252620_1511	CRT	76	K	K	WT
J0252620_1511	DHFR	108	S	N	Resistant
J0252620_1511	DHPS	437	A	G	Resistant
J0262707_1412	CRT	76	K	T	Resistant
J0262707_1412	DHFR	108	S	N	Resistant
J0262707_1412	DHPS	437	A	A	WT
J0262707_1412	MDR1	86	N	N	WT
J0262707_1506	CRT	76	K	T,K	Mixed
J0262707_1506	DHFR	108	S	N	Resistant
J0262707_1506	DHPS	437	A	A	WT
J0262710_1511	CRT	76	K	K	WT
J0262710_1511	DHFR	108	S	N	Resistant
J0262710_1511	DHPS	437	A	A	WT
J0262712_1412	DHPS	437	A	G	Resistant
J0262712_1412	MDR1	86	N	N	WT
J0262723_1511	CRT	76	K	K	WT
J0262723_1511	DHFR	108	S	N	Resistant
J0262723_1511	DHPS	437	A	G	Resistant
J0262723_1511	MDR1	86	N	N	WT
J0262731_1412	CRT	76	K	T	Resistant
J0262731_1412	DHFR	108	S	N	Resistant
J0262731_1412	DHPS	437	A	A	WT
J0262731_1412	MDR1	86	N	N	WT
J0262741_1412	DHFR	108	S	N	Resistant
J0262741_1412	DHPS	437	A	G	Resistant
J0262744_1611	DHFR	108	S	N	Resistant
J0262744_1611	MDR1	86	N	N	WT
J0272802_1412	CRT	76	K	K	WT
J0272802_1412	DHFR	108	S	N	Resistant
J0272802_1412	DHPS	437	A	G	Resistant
J0272802_1412	MDR1	86	N	N	WT
J0272803_1512	CRT	76	K	T	Resistant
J0272803_1512	DHFR	108	S	N	Resistant
J0272803_1512	DHPS	437	A	G	Resistant
J0272804_1511	CRT	76	K	T	Resistant
J0272804_1511	DHFR	108	S	N	Resistant
J0272804_1511	DHPS	437	A	A	WT
J0272804_1511	MDR1	86	N	N	WT
J0272809_1611	CRT	76	K	K	WT
J0272809_1611	DHFR	108	S	N	Resistant
J0272809_1611	DHPS	437	A	G	Resistant
J0272809_1611	MDR1	86	N	N	WT
J0272809_1612	CRT	76	K	K	WT
J0272809_1612	DHFR	108	S	N	Resistant
J0272809_1612	DHPS	437	A	A	WT
J0272809_1612	MDR1	86	N	N	WT
J0272812_1611	DHFR	108	S	N	Resistant
J0272812_1611	DHPS	437	A	A	WT
J0272812_1611	MDR1	86	N	N	WT
J0272813_1610	CRT	76	K	K	WT
J0272813_1610	DHFR	108	S	N	Resistant
J0272813_1610	DHPS	437	A	A	WT
J0272813_1612	MDR1	86	N	N	WT
J0272813_1701	CRT	76	K	K	WT
J0272813_1701	MDR1	86	N	N	WT
J0272813_1702	CRT	76	K	K	WT
J0272813_1702	DHFR	108	S	N	Resistant
J0272813_1702	DHPS	437	A	A	WT
J0272813_1702	MDR1	86	N	N	WT
J0272813_1703	DHFR	108	S	N	Resistant
J0272813_1703	DHPS	437	A	A	WT
J0272813_1703	MDR1	86	N	N	WT
J0272813_1704	CRT	76	K	K	WT
J0272813_1704	DHFR	108	S	N	Resistant
J0272813_1704	MDR1	86	N	N	WT
J0272813_1705	DHFR	108	S	N	Resistant
J0272813_1705	MDR1	86	N	N	WT
J0272815_1611	CRT	76	K	K	WT
J0272815_1611	DHFR	108	S	N	Resistant
J0272815_1611	DHPS	437	A	A	WT
J0272815_1611	MDR1	86	N	N	WT
J0272815_1701	CRT	76	K	K	WT
J0272815_1701	DHFR	108	S	N	Resistant
J0272815_1701	DHPS	437	A	A	WT
J0272815_1701	MDR1	86	N	N	WT
J0272815_1702	CRT	76	K	K	WT
J0272815_1702	DHFR	108	S	N	Resistant
J0272815_1702	DHPS	437	A	A	WT
J0272815_1702	MDR1	86	N	N	WT
J0272815_1703	DHFR	108	S	N	Resistant
J0272815_1703	MDR1	86	N	N	WT
J0272815_1704	CRT	76	K	K	WT
J0272815_1704	DHPS	437	A	A	WT
J0272815_1704	MDR1	86	N	N	WT
J0272815_1705	CRT	76	K	K	WT
J0272815_1705	DHPS	437	A	A	WT
J0272815_1705	MDR1	86	N	N	WT
J0282915_1511	CRT	76	K	T	Resistant
J0282915_1511	DHFR	108	S	N	Resistant
J0282915_1511	DHPS	437	A	A	WT
J0282916_1701	CRT	76	K	T,K	Mixed
J0282916_1701	DHFR	108	S	N	Resistant
J0282916_1701	DHPS	437	A	A	WT
J0282916_1702	CRT	76	K	T	Resistant
J0282916_1702	DHPS	437	A	A	WT
J0282916_1702	MDR1	86	N	Y	Resistant
J0282916_1703	CRT	76	K	K	WT
J0282916_1703	DHFR	108	S	N	Resistant
J0282916_1703	DHPS	437	A	A	WT
J0282916_1704	DHFR	108	S	N	Resistant
J0282916_1704	DHPS	437	A	A	WT
J0282916_1704	MDR1	86	N	Y	Resistant
J0282916_1705	CRT	76	K	T	Resistant
J0282916_1705	DHFR	108	S	N	Resistant
J0282916_1705	DHPS	437	A	A	WT
K0010101_1611	DHFR	108	S	N	Resistant
K0010101_1611	MDR1	86	N	N	WT
K0010105_1412	DHFR	108	S	N	Resistant
K0010105_1412	DHPS	437	A	G	Resistant
K0010105_1412	MDR1	86	N	Y	Resistant
K0010105_1504	CRT	76	K	K	WT
K0010105_1504	DHFR	108	S	N	Resistant
K0010105_1504	DHPS	437	A	G	Resistant
K0010105_1504	MDR1	86	N	N	WT
K0010105_1506	CRT	76	K	K	WT
K0010105_1506	DHFR	108	S	N	Resistant
K0010105_1506	DHPS	437	A	G	Resistant
K0010105_1506	MDR1	86	N	N	WT
K0010105_1607	DHFR	108	S	N	Resistant
K0010105_1607	DHPS	437	A	G	Resistant
K0020203_1511	CRT	76	K	T	Resistant
K0020203_1511	DHFR	108	S	N	Resistant
K0020203_1511	DHPS	437	A	G	Resistant
K0020204_1512	CRT	76	K	K	WT
K0020204_1512	DHFR	108	S	N	Resistant
K0020204_1512	DHPS	437	A	A	WT
K0020204_1512	MDR1	86	N	N	WT
K0022008_1512	CRT	76	K	T	Resistant
K0022008_1512	DHFR	108	S	N	Resistant
K0022008_1512	DHPS	437	A	A	WT
K0022008_1512	MDR1	86	N	N	WT
K0030301_1504	CRT	76	K	T	Resistant
K0030301_1504	DHFR	108	S	N	Resistant
K0030301_1504	DHPS	437	A	A	WT
K0030301_1504	MDR1	86	N	N	WT
K0030302_1511	DHFR	108	S	N	Resistant
K0030302_1511	DHPS	437	A	A	WT
K0030302_1511	MDR1	86	N	N	WT
K0030302_1512	CRT	76	K	T	Resistant
K0030302_1512	DHFR	108	S	N	Resistant
K0030302_1512	DHPS	437	A	A	WT
K0030302_1512	MDR1	86	N	N	WT
K0030302_1610	CRT	76	K	T	Resistant
K0030302_1610	DHFR	108	S	N	Resistant
K0030302_1610	DHPS	437	A	A	WT
K0030302_1610	MDR1	86	N	N	WT
K0030302_1611	CRT	76	K	T	Resistant
K0030302_1611	DHPS	437	A	A	WT
K0030302_1611	MDR1	86	N	N	WT
K0030302_1612	DHFR	108	S	N	Resistant
K0030302_1612	MDR1	86	N	N	WT
K0030303_1511	CRT	76	K	K	WT
K0030303_1511	DHFR	108	S	N	Resistant
K0030303_1511	DHPS	437	A	A	WT
K0030303_1512	CRT	76	K	K	WT
K0030303_1512	DHFR	108	S	N	Resistant
K0030303_1512	DHPS	437	A	G	Resistant
K0030303_1512	MDR1	86	N	N	WT
K0030303_1603	CRT	76	K	K	WT
K0030303_1603	DHFR	108	S	N	Resistant
K0030303_1603	DHPS	437	A	A	WT
K0030303_1603	MDR1	86	N	N	WT
K0030303_1605	CRT	76	K	K	WT
K0030303_1605	DHFR	108	S	N	Resistant
K0030303_1605	DHPS	437	A	A	WT
K0030303_1605	MDR1	86	N	N	WT
K0030303_1607	CRT	76	K	K	WT
K0030303_1607	DHFR	108	S	N	Resistant
K0030303_1607	DHPS	437	A	A	WT
K0030303_1607	MDR1	86	N	N	WT
K0030303_1612	CRT	76	K	T	Resistant
K0030303_1612	DHPS	437	A	A	WT
K0030303_1612	MDR1	86	N	N	WT
K0050502_1512	CRT	76	K	K	WT
K0050502_1512	DHFR	108	S	N	Resistant
K0050502_1512	DHPS	437	A	A	WT
K0050508_1603	CRT	76	K	K	WT
K0050508_1603	DHFR	108	S	N	Resistant
K0050508_1603	DHPS	437	A	A	WT
K0050512_1611	CRT	76	K	T	Resistant
K0050512_1611	DHPS	437	A	A	WT
K0050512_1611	MDR1	86	N	N	WT
K0050516_1511	CRT	76	K	T	Resistant
K0050516_1511	DHFR	108	S	N	Resistant
K0050516_1511	DHPS	437	A	A	WT
K0060609_1511	DHPS	437	A	A	WT
K0060609_1605	DHFR	108	S	N	Resistant
K0060609_1605	DHPS	437	A	A	WT
K0060609_1605	MDR1	86	N	N	WT
K0060614_1511	DHFR	108	S	N	Resistant
K0060614_1511	DHPS	437	A	G	Resistant
K0060614_1511	MDR1	86	N	N	WT
K0060617_1511	CRT	76	K	K	WT
K0060617_1511	DHPS	437	A	A	WT
K0060617_1511	MDR1	86	N	N	WT
K0060617_1512	CRT	76	K	K	WT
K0060617_1512	DHPS	437	A	A	WT
K0060617_1512	MDR1	86	N	N	WT
K0060617_1603	DHPS	437	A	A	WT
K0060617_1603	MDR1	86	N	N	WT
K0060617_1605	CRT	76	K	K	WT
K0060617_1605	DHPS	437	A	A	WT
K0060617_1605	MDR1	86	N	N	WT
K0060617_1607	DHPS	437	A	A	WT
K0070713_1610	CRT	76	K	T	Resistant
K0070713_1610	DHFR	108	S	N	Resistant
K0070714_1611	CRT	76	K	T	Resistant
K0070714_1611	DHFR	108	S	N	Resistant
K0070714_1611	DHPS	437	A	A	WT
K0070714_1611	MDR1	86	N	N	WT
K0080809_1612	CRT	76	K	T	Resistant
K0080809_1612	DHFR	108	S	N	Resistant
K0080809_1612	DHPS	437	A	A	WT
K0080809_1702	CRT	76	K	T	Resistant
K0080809_1702	DHFR	108	S	N	Resistant
K0080809_1702	DHPS	437	A	A	WT
K0090902_1607	CRT	76	K	T	Resistant
K0090902_1607	DHFR	108	S	S	WT
K0090902_1607	DHPS	437	A	A	WT
K0090903_1511	CRT	76	K	K	WT
K0090903_1511	DHFR	108	S	N	Resistant
K0090903_1511	DHPS	437	A	G	Resistant
K0090903_1511	MDR1	86	N	N	WT
K0090903_1512	CRT	76	K	K	WT
K0090903_1512	DHFR	108	S	N	Resistant
K0090903_1512	DHPS	437	A	G	Resistant
K0090903_1512	MDR1	86	N	N	WT
K0090903_1603	DHFR	108	S	N	Resistant
K0090903_1603	DHPS	437	A	G	Resistant
K0090903_1603	MDR1	86	N	N	WT
K0090903_1605	DHFR	108	S	N	Resistant
K0090903_1605	DHPS	437	A	G	Resistant
K0090903_1605	MDR1	86	N	N	WT
K0090903_1607	DHFR	108	S	N	Resistant
K0090903_1607	DHPS	437	A	G	Resistant
K0090903_1607	MDR1	86	N	N	WT
K0090903_1610	CRT	76	K	K	WT
K0090903_1610	DHFR	108	S	N	Resistant
K0090903_1610	DHPS	437	A	G	Resistant
K0090903_1610	MDR1	86	N	N	WT
K0090905_1607	DHFR	108	S	N	Resistant
K0090905_1607	DHPS	437	A	G	Resistant
K0090906_1504	DHFR	108	S	N	Resistant
K0090906_1504	MDR1	86	N	N	WT
K0090906_1506	CRT	76	K	K	WT
K0090906_1506	DHFR	108	S	N	Resistant
K0090906_1506	DHPS	437	A	A	WT
K0101005_1512	CRT	76	K	K	WT
K0101005_1512	DHFR	108	S	S	WT
K0101005_1512	DHPS	437	A	A	WT
K0101005_1512	MDR1	86	N	N	WT
K0101005_1702	DHFR	108	S	N	Resistant
K0101007_1412	CRT	76	K	T	Resistant
K0101007_1412	DHFR	108	S	N	Resistant
K0101007_1412	DHPS	437	A	A	WT
K0101007_1412	MDR1	86	N	N	WT
K0111111_1611	CRT	76	K	T	Resistant
K0111111_1611	DHFR	108	S	N	Resistant
K0111111_1611	DHPS	437	A	A	WT
K0111111_1611	MDR1	86	N	N	WT
K0121209_1412	DHFR	108	S	S	WT
K0121209_1412	DHPS	437	A	G	Resistant
K0141403_1504	CRT	76	K	T	Resistant
K0141403_1504	DHFR	108	S	N	Resistant
K0141403_1504	DHPS	437	A	A	WT
K0141403_1504	MDR1	86	N	N	WT
K0141403_1506	CRT	76	K	T	Resistant
K0141403_1506	DHFR	108	S	N	Resistant
K0141403_1506	DHPS	437	A	A	WT
K0141403_1506	MDR1	86	N	N	WT
K0141403_1511	CRT	76	K	T	Resistant
K0141403_1511	DHFR	108	S	N	Resistant
K0141403_1511	DHPS	437	A	A	WT
K0141403_1511	MDR1	86	N	N	WT
K0141403_1512	CRT	76	K	K	WT
K0141403_1512	DHFR	108	S	N	Resistant
K0141403_1512	DHPS	437	A	A	WT
K0141403_1512	MDR1	86	N	N	WT
K0141404_1511	DHFR	108	S	N	Resistant
K0141404_1511	DHPS	437	A	A	WT
K0151503_1412	DHFR	108	S	N	Resistant
K0151503_1412	DHPS	437	A	A	WT
K0151503_1412	MDR1	86	N	N	WT
K0151508_1612	CRT	76	K	T	Resistant
K0151508_1612	DHFR	108	S	N	Resistant
K0151508_1612	DHPS	437	A	A	WT
K0151509_1610	DHFR	108	S	N	Resistant
K0151509_1610	DHPS	437	A	G	Resistant
K0151509_1610	MDR1	86	N	Y	Resistant
K0151511_1610	CRT	76	K	T	Resistant
K0151511_1610	DHPS	437	A	A	WT
K0151512_1412	DHPS	437	A	G	Resistant
K0161621_1506	DHPS	437	A	A	WT
K0171707_1412	DHFR	108	S	N	Resistant
K0171707_1412	MDR1	86	N	N	WT
K0171716_1612	CRT	76	K	T	Resistant
K0171716_1612	DHFR	108	S	N	Resistant
K0171716_1612	DHPS	437	A	A	WT
K0171716_1612	MDR1	86	N	N	WT
K0171716_1701	DHFR	108	S	N	Resistant
K0171716_1701	DHPS	437	A	A	WT
K0171716_1701	MDR1	86	N	N	WT
K0171716_1702	CRT	76	K	T	Resistant
K0171716_1702	DHPS	437	A	A	WT
K0171716_1702	MDR1	86	N	N	WT
K0171716_1703	CRT	76	K	T	Resistant
K0171716_1703	DHPS	437	A	A	WT
K0171716_1703	MDR1	86	N	N	WT
K0171719_1701	CRT	76	K	T	Resistant
K0171719_1701	DHFR	108	S	N	Resistant
K0171719_1705	CRT	76	K	K	WT
K0171719_1705	DHPS	437	A	G	Resistant
K0171722_1512	CRT	76	K	T	Resistant
K0171722_1512	DHFR	108	S	N	Resistant
K0171722_1512	DHPS	437	A	A	WT
K0171722_1512	MDR1	86	N	N	WT
K0171723_1412	MDR1	86	N	N	WT
K0171724_1611	CRT	76	K	T	Resistant
K0171724_1611	DHFR	108	S	N	Resistant
K0171728_1512	CRT	76	K	K	WT
K0171728_1512	DHFR	108	S	N	Resistant
K0171728_1512	DHPS	437	A	A	WT
K0171728_1512	MDR1	86	N	N	WT
K0171728_1605	CRT	76	K	K	WT
K0171728_1605	DHFR	108	S	N	Resistant
K0171728_1605	DHPS	437	A	A	WT
K0171728_1605	MDR1	86	N	N	WT
K0171730_1603	CRT	76	K	T	Resistant
K0171730_1603	DHFR	108	S	N	Resistant
K0171730_1603	DHPS	437	A	A	WT
K0171730_1603	MDR1	86	N	N	WT
K0171732_1511	DHFR	108	S	N	Resistant
K0171732_1511	DHPS	437	A	G	Resistant
K0171732_1511	MDR1	86	N	N	WT
K0171732_1512	CRT	76	K	T	Resistant
K0171732_1512	DHFR	108	S	N	Resistant
K0171732_1512	DHPS	437	A	G	Resistant
K0171732_1512	MDR1	86	N	Y	Resistant
K0171732_1612	CRT	76	K	T	Resistant
K0171732_1612	DHFR	108	S	N	Resistant
K0171732_1612	MDR1	86	N	N	WT
K0171738_1412	CRT	76	K	T	Resistant
K0171738_1412	DHFR	108	S	N	Resistant
K0171738_1412	DHPS	437	A	G	Resistant
K0171738_1412	MDR1	86	N	N	WT
K0171742_1701	DHFR	108	S	N	Resistant
K0181809_1512	CRT	76	K	K	WT
K0181809_1512	DHFR	108	S	S	WT
K0181809_1512	DHPS	437	A	A	WT
K0181809_1512	MDR1	86	N	N	WT
K0181810_1412	DHFR	108	S	S	WT
K0181810_1412	MDR1	86	N	N	WT
K0181810_1612	CRT	76	K	K	WT
K0181810_1612	DHFR	108	S	N	Resistant
K0181810_1612	MDR1	86	N	N	WT
K0181810_1705	CRT	76	K	T	Resistant
K0181810_1705	DHFR	108	S	N	Resistant
K0181810_1705	MDR1	86	N	N	WT
K0191907_1511	DHFR	108	S	N	Resistant
K0191907_1511	DHPS	437	A	G	Resistant
K0202002_1512	CRT	76	K	T	Resistant
K0202002_1512	DHFR	108	S	S	WT
K0202002_1512	DHPS	437	A	G	Resistant
K0202002_1512	MDR1	86	N	N	WT
K0202008_1605	CRT	76	K	T	Resistant
K0202008_1605	DHFR	108	S	N	Resistant
K0202008_1605	DHPS	437	A	G	Resistant
K0202008_1605	MDR1	86	N	Y	Resistant
K0212102_1512	CRT	76	K	T	Resistant
K0212102_1512	DHFR	108	S	S	WT
K0212102_1512	DHPS	437	A	G	Resistant
K0212102_1512	MDR1	86	N	N	WT
K0212109_1504	CRT	76	K	K	WT
K0212109_1504	DHFR	108	S	N	Resistant
K0212109_1504	DHPS	437	A	A	WT
K0212109_1504	MDR1	86	N	N	WT
K0212109_1506	CRT	76	K	K	WT
K0212109_1506	DHFR	108	S	N	Resistant
K0212109_1506	DHPS	437	A	A	WT
K0212109_1506	MDR1	86	N	N	WT
K0212110_1512	CRT	76	K	K	WT
K0212110_1512	DHFR	108	S	N	Resistant
K0212110_1512	DHPS	437	A	A	WT
K0212110_1512	MDR1	86	N	N	WT
K0212205_1603	DHFR	108	S	N	Resistant
K0212205_1603	DHPS	437	A	A	WT
K0222204_1506	DHPS	437	A	G	Resistant
K0222208_1611	DHFR	108	S	N	Resistant
K0222208_1611	DHPS	437	A	A	WT
K0222208_1611	MDR1	86	N	Y	Resistant
K0222213_1612	CRT	76	K	T	Resistant
K0222213_1612	DHFR	108	S	N	Resistant
K0222213_1612	MDR1	86	N	N	WT
K0222213_1701	CRT	76	K	T	Resistant
K0222213_1701	MDR1	86	N	N	WT
K0222213_1702	CRT	76	K	T	Resistant
K0222213_1702	DHFR	108	S	N	Resistant
K0222213_1702	DHPS	437	A	A	WT
K0222213_1702	MDR1	86	N	Y	Resistant
K0222213_1705	CRT	76	K	T	Resistant
K0222213_1705	DHFR	108	S	N	Resistant
K0222213_1705	DHPS	437	A	A	WT
K0232412_1612	CRT	76	K	T	Resistant
K0232412_1612	DHFR	108	S	N	Resistant
K0232412_1612	MDR1	86	N	N	WT
K0232412_1701	DHFR	108	S	N	Resistant
K0232412_1703	DHFR	108	S	N	Resistant
K0232412_1703	DHPS	437	A	G	Resistant
K0232412_1703	MDR1	86	N	N	WT
K0232412_1704	CRT	76	K	T	Resistant
K0232412_1704	DHFR	108	S	N	Resistant
K0232412_1704	DHPS	437	A	A	WT
K0232412_1704	MDR1	86	N	N	WT
K0232412_1705	CRT	76	K	T	Resistant
K0232412_1705	DHFR	108	S	N	Resistant
K0232412_1705	DHPS	437	A	A	WT
K0232412_1705	MDR1	86	N	N	WT
K0242508_1412	DHPS	437	A	A	WT
K0242508_1512	CRT	76	K	K	WT
K0242508_1512	DHFR	108	S	N	Resistant
K0242508_1512	DHPS	437	A	G	Resistant
K0242508_1512	MDR1	86	N	N	WT
K0242508_1605	CRT	76	K	K	WT
K0242508_1605	DHFR	108	S	N	Resistant
K0242508_1605	DHPS	437	A	A	WT
K0242508_1605	MDR1	86	N	N	WT
K0242508_1607	DHFR	108	S	N	Resistant
K0242508_1607	MDR1	86	N	N	WT
K0242512_1607	MDR1	86	N	N	WT
K0242515_1412	DHPS	437	A	A	WT
K0252706_1506	DHFR	108	S	N	Resistant
K0252706_1506	DHPS	437	A	A	WT
K0252713_1512	DHFR	108	S	S	WT
K0252713_1512	DHPS	437	A	G	Resistant
K0252717_1511	CRT	76	K	T	Resistant
K0252717_1511	DHFR	108	S	N	Resistant
K0252717_1511	DHPS	437	A	G	Resistant
K0252717_1512	CRT	76	K	T	Resistant
K0252717_1512	DHFR	108	S	N	Resistant
K0252717_1512	DHPS	437	A	G	Resistant
K0252717_1512	MDR1	86	N	Y	Resistant
K0252724_1412	DHFR	108	S	N	Resistant
K0252724_1412	DHPS	437	A	G	Resistant
K0252805_1506	CRT	76	K	T	Resistant
K0252805_1506	DHFR	108	S	N	Resistant
K0252805_1506	DHPS	437	A	G	Resistant
K0252808_1611	CRT	76	K	K	WT
K0252808_1611	MDR1	86	N	N	WT
K0252808_1701	CRT	76	K	T	Resistant
K0252808_1701	DHPS	437	A	A	WT
K0252808_1701	MDR1	86	N	N	WT
K0252808_1702	DHFR	108	S	N	Resistant
K0252808_1702	DHPS	437	A	A	WT
K0252808_1702	MDR1	86	N	N	WT
K0262902_1511	CRT	76	K	K	WT
K0262902_1511	DHFR	108	S	N	Resistant
K0262902_1511	DHPS	437	A	G	Resistant
K0262902_1511	MDR1	86	N	N	WT
K0262913_1611	CRT	76	K	T	Resistant
K0262913_1611	DHFR	108	S	N	Resistant
K0262913_1611	DHPS	437	A	A	WT
K0262913_1611	MDR1	86	N	N	WT
K0262922_1612	CRT	76	K	T	Resistant
K0262922_1612	DHFR	108	S	N	Resistant
K0262922_1612	MDR1	86	N	N	WT
K0262922_1701	CRT	76	K	K	WT
K0262922_1702	CRT	76	K	T	Resistant
K0262922_1702	DHFR	108	S	N	Resistant
K0262922_1702	DHPS	437	A	A	WT
K0262922_1702	MDR1	86	N	N	WT
K0262922_1703	CRT	76	K	T	Resistant
K0262922_1703	DHFR	108	S	N	Resistant
K0262922_1703	DHPS	437	A	A	WT
K0262922_1703	MDR1	86	N	N	WT
K0262922_1704	CRT	76	K	T	Resistant
K0262922_1704	DHFR	108	S	N	Resistant
K0262922_1704	DHPS	437	A	A	WT
K0262922_1704	MDR1	86	N	N	WT
K0262922_1705	CRT	76	K	T	Resistant
K0262922_1705	MDR1	86	N	N	WT
K0262932_1611	DHFR	108	S	N	Resistant
K0262932_1611	DHPS	437	A	A	WT
K0262932_1611	MDR1	86	N	Y	Resistant
K0262935_1612	CRT	76	K	T	Resistant
K0262935_1612	DHFR	108	S	N	Resistant
K0262935_1612	DHPS	437	A	A	WT
K0262935_1612	MDR1	86	N	N	WT
K0262935_1702	CRT	76	K	T	Resistant
K0262935_1702	DHFR	108	S	N	Resistant
K0262935_1702	DHPS	437	A	A	WT
K0262940_1511	CRT	76	K	T	Resistant
K0262940_1511	DHFR	108	S	N	Resistant
K0262940_1511	DHPS	437	A	A	WT
K0262940_1511	MDR1	86	N	Y	Resistant
K0262940_1512	CRT	76	K	T	Resistant
K0262940_1512	DHFR	108	S	N	Resistant
K0262940_1512	DHPS	437	A	A	WT
K0262940_1512	MDR1	86	N	Y	Resistant
K0262940_1603	CRT	76	K	T	Resistant
K0262940_1603	DHFR	108	S	N	Resistant
K0262940_1603	DHPS	437	A	A	WT
K0262940_1603	MDR1	86	N	Y	Resistant
K0262940_1605	CRT	76	K	T	Resistant
K0262940_1605	DHFR	108	S	N	Resistant
K0262940_1605	DHPS	437	A	A	WT
K0262940_1605	MDR1	86	N	Y	Resistant
K0262940_1612	CRT	76	K	T	Resistant
K0262940_1612	DHFR	108	S	N	Resistant
K0262940_1612	DHPS	437	A	A	WT
K0262940_1701	CRT	76	K	T	Resistant
K0262940_1701	MDR1	86	N	N	WT
K0262940_1702	CRT	76	K	T	Resistant
K0262940_1702	DHPS	437	A	A	WT
K0262940_1702	MDR1	86	N	Y	Resistant
K0262940_1703	CRT	76	K	T	Resistant
K0262940_1703	DHFR	108	S	N	Resistant
K0262940_1703	DHPS	437	A	A	WT
K0262940_1703	MDR1	86	N	Y	Resistant
K0262940_1704	CRT	76	K	T	Resistant
K0262940_1704	DHPS	437	A	A	WT
K0262940_1704	MDR1	86	N	N	WT
K0262941_1702	CRT	76	K	T	Resistant
K0262941_1702	DHFR	108	S	N	Resistant
K0262941_1702	DHPS	437	A	A	WT
K0262941_1705	DHPS	437	A	A	WT
K0263004_1511	CRT	76	K	K	WT
K0263004_1511	DHFR	108	S	N	Resistant
K0263004_1511	DHPS	437	A	G	Resistant
K0263004_1511	MDR1	86	N	N	WT
K0263004_1512	CRT	76	K	K	WT
K0263004_1512	DHFR	108	S	N	Resistant
K0263004_1512	DHPS	437	A	G	Resistant
K0263004_1512	MDR1	86	N	N	WT
K0263004_1603	CRT	76	K	K	WT
K0263004_1603	DHFR	108	S	N	Resistant
K0263004_1603	DHPS	437	A	G	Resistant
K0263004_1603	MDR1	86	N	N	WT
K0263008_1612	CRT	76	K	T	Resistant
K0263008_1612	DHFR	108	S	N	Resistant
K0263008_1612	DHPS	437	A	A	WT
K0263008_1612	MDR1	86	N	N	WT
K0263008_1702	CRT	76	K	T	Resistant
K0263008_1702	DHFR	108	S	N	Resistant
K0263008_1702	DHPS	437	A	A	WT
K0263008_1702	MDR1	86	N	N	WT
K0263008_1703	CRT	76	K	T	Resistant
K0263008_1703	DHFR	108	S	N	Resistant
K0263008_1703	DHPS	437	A	A	WT
K0263008_1703	MDR1	86	N	N	WT
K0263008_1704	CRT	76	K	T	Resistant
K0263008_1704	DHPS	437	A	A	WT
K0263008_1704	MDR1	86	N	N	WT
K0263008_1705	CRT	76	K	T	Resistant
K0263008_1705	DHFR	108	S	N	Resistant
K0263008_1705	DHPS	437	A	A	WT
K0263008_1705	MDR1	86	N	N	WT
K0263111_1612	CRT	76	K	K	WT
K0263111_1612	DHFR	108	S	N	Resistant
K0263111_1612	MDR1	86	N	N	WT
K0263111_1705	CRT	76	K	T	Resistant
K0263111_1705	DHFR	108	S	N	Resistant
K0263111_1705	DHPS	437	A	A	WT
K0273207_1511	CRT	76	K	T	Resistant
K0273207_1511	DHFR	108	S	N	Resistant
K0273207_1511	DHPS	437	A	A	WT
K0273207_1605	CRT	76	K	T	Resistant
K0273207_1605	DHFR	108	S	N	Resistant
K0273207_1605	DHPS	437	A	A	WT
K0283310_1511	CRT	76	K	T	Resistant
K0283310_1511	DHFR	108	S	S	WT
K0283310_1511	DHPS	437	A	A	WT
K0283310_1511	MDR1	86	N	N	WT
K0283406_1512	CRT	76	K	T	Resistant
K0283406_1512	DHFR	108	S	N	Resistant
K0283406_1512	MDR1	86	N	N	WT
K0303507_1603	CRT	76	K	T	Resistant
K0303507_1603	DHFR	108	S	N	Resistant
K0303507_1603	DHPS	437	A	G	Resistant
K0303507_1605	CRT	76	K	K	WT
K0303507_1605	DHFR	108	S	N	Resistant
K0303507_1605	DHPS	437	A	A	WT
K0303507_1605	MDR1	86	N	N	WT
K0303507_1607	DHFR	108	S	N	Resistant
K0303507_1607	DHPS	437	A	A	WT
K0303507_1607	MDR1	86	N	N	WT
K0323702_1611	CRT	76	K	T	Resistant
K0323702_1611	DHFR	108	S	N	Resistant
K0323702_1611	DHPS	437	A	A	WT
K0323702_1611	MDR1	86	N	N	WT
K0323703_1701	DHFR	108	S	N	Resistant
K0323703_1701	DHPS	437	A	A	WT
K0323703_1701	MDR1	86	N	N	WT
K0323703_1704	DHPS	437	A	A	WT
K0323705_1506	DHFR	108	S	N	Resistant
K0323705_1506	DHPS	437	A	G	Resistant
K0323717_1412	DHPS	437	A	G	Resistant
K0323719_1511	CRT	76	K	K	WT
K0323719_1511	DHFR	108	S	N	Resistant
K0323719_1511	DHPS	437	A	G	Resistant
K0323719_1511	MDR1	86	N	N	WT
K0323725_1511	CRT	76	K	T	Resistant
K0323725_1511	DHFR	108	S	N	Resistant
K0323725_1511	DHPS	437	A	A	WT
K0323725_1511	MDR1	86	N	N	WT
K0323730_1511	CRT	76	K	T	Resistant
K0323730_1511	DHFR	108	S	N	Resistant
K0323730_1511	DHPS	437	A	A	WT
K0344010_1511	DHPS	437	A	G	Resistant
K0344032_1512	CRT	76	K	K	WT
K0344032_1512	DHFR	108	S	N	Resistant
K0344032_1512	DHPS	437	A	A	WT
K0344032_1512	MDR1	86	N	N	WT
K0344102_1511	CRT	76	K	K	WT
K0344102_1511	DHFR	108	S	N	Resistant
K0344102_1511	DHPS	437	A	A	WT
K0344110_1506	DHPS	437	A	G	Resistant
K0344111_1511	CRT	76	K	T	Resistant
K0344111_1511	DHFR	108	S	N	Resistant
K0344111_1511	DHPS	437	A	G	Resistant
K0344111_1511	MDR1	86	N	Y	Resistant
K0364309_1511	DHFR	108	S	N	Resistant
K0364309_1511	DHPS	437	A	A	WT
K0364311_1511	CRT	76	K	K	WT
K0364311_1511	DHFR	108	S	N	Resistant
K0364311_1511	DHPS	437	A	G	Resistant
K0364311_1511	MDR1	86	N	N	WT
K0364312_1511	DHFR	108	S	N	Resistant
K0364312_1607	CRT	76	K	K	WT
K0364312_1607	DHPS	437	A	A	WT
K0364312_1607	MDR1	86	N	N	WT
K0364312_1612	CRT	76	K	T	Resistant
K0364312_1612	DHFR	108	S	N	Resistant
K0364312_1612	DHPS	437	A	A	WT
K0364312_1612	MDR1	86	N	N	WT
K0364314_1612	DHFR	108	S	N	Resistant
K0364314_1612	DHPS	437	A	A	WT
K0364314_1612	MDR1	86	N	N	WT
K0364314_1701	CRT	76	K	T	Resistant
K0364314_1701	DHFR	108	S	N	Resistant
K0364314_1701	DHPS	437	A	A	WT
K0364314_1701	MDR1	86	N	N	WT
K0364319_1511	CRT	76	K	T	Resistant
K0364319_1511	DHFR	108	S	S	WT
K0364319_1511	DHPS	437	A	G	Resistant
K0364319_1511	MDR1	86	N	N	WT
K0364319_1612	CRT	76	K	T	Resistant
K0364319_1612	DHFR	108	S	N	Resistant
K0364319_1612	DHPS	437	A	A	WT
K0364319_1612	MDR1	86	N	N	WT
K0364320_1506	CRT	76	K	K	WT
K0364320_1506	DHFR	108	S	N	Resistant
K0364320_1506	DHPS	437	A	A	WT
K0364324_1612	CRT	76	K	T	Resistant
K0364324_1612	DHFR	108	S	N	Resistant
K0364324_1612	DHPS	437	A	A	WT
K0364324_1701	CRT	76	K	T	Resistant
K0364324_1701	MDR1	86	N	N	WT
K0364329_1511	CRT	76	K	T	Resistant
K0364329_1511	DHFR	108	S	N	Resistant
K0364329_1511	DHPS	437	A	G	Resistant
K0364329_1511	MDR1	86	N	N	WT
K0374406_1612	CRT	76	K	T	Resistant
K0374406_1612	DHFR	108	S	N	Resistant
K0374406_1612	DHPS	437	A	A	WT
K0374406_1612	MDR1	86	N	N	WT
K0374406_1701	DHFR	108	S	N	Resistant
K0374406_1702	CRT	76	K	T	Resistant
K0374406_1702	DHFR	108	S	N	Resistant
K0374406_1702	DHPS	437	A	A	WT
K0374406_1705	CRT	76	K	K	WT
K0374406_1705	DHFR	108	S	N	Resistant
K0374406_1705	DHPS	437	A	A	WT
K0374406_1705	MDR1	86	N	N	WT
K0374408_1412	CRT	76	K	T,K	Mixed
K0374408_1412	DHFR	108	S	N	Resistant
K0374408_1412	DHPS	437	A	A	WT
K0374413_1611	DHFR	108	S	N	Resistant
K0374413_1611	DHPS	437	A	A	WT
K0374413_1611	MDR1	86	N	N	WT
K0374502_1412	CRT	76	K	T	Resistant
K0374502_1412	DHFR	108	S	N	Resistant
K0374502_1412	DHPS	437	A	A	WT
K0374502_1412	MDR1	86	N	N	WT
K0374502_1612	DHPS	437	A	A	WT
K0374502_1612	MDR1	86	N	N	WT
K0374502_1705	CRT	76	K	T	Resistant
K0374502_1705	DHPS	437	A	A	WT
K0374502_1705	MDR1	86	N	N	WT
K0384601_1701	DHPS	437	A	A	WT
K0384601_1701	MDR1	86	N	Y	Resistant
K0384601_1702	CRT	76	K	K	WT
K0384601_1702	DHPS	437	A	A	WT
K0384602_1512	CRT	76	K	K	WT
K0384602_1512	DHFR	108	S	N	Resistant
K0384602_1512	DHPS	437	A	A	WT
K0384602_1512	MDR1	86	N	N	WT
K0384604_1511	CRT	76	K	K	WT
K0384604_1511	DHFR	108	S	N	Resistant
K0384604_1511	DHPS	437	A	G	Resistant
K0384611_1612	CRT	76	K	T	Resistant
K0384611_1612	DHFR	108	S	N	Resistant
K0384611_1612	DHPS	437	A	A	WT
K0384611_1612	MDR1	86	N	Y	Resistant
K0384611_1701	CRT	76	K	K	WT
K0384611_1701	DHPS	437	A	A	WT
K0384611_1701	MDR1	86	N	Y	Resistant
K0384611_1702	CRT	76	K	K	WT
K0384611_1702	DHPS	437	A	A	WT
K0384611_1702	MDR1	86	N	Y	Resistant
K0394906_1611	CRT	76	K	T	Resistant
K0394906_1611	DHFR	108	S	N	Resistant
K0394906_1611	DHPS	437	A	A	WT
K0394906_1611	MDR1	86	N	N	WT
K0394917_1611	DHFR	108	S	N	Resistant
K0394917_1611	DHPS	437	A	A	WT
K0394923_1610	CRT	76	K	T	Resistant
K0394923_1610	DHFR	108	S	N	Resistant
K0394923_1610	MDR1	86	N	N	WT
K0394934_1610	CRT	76	K	T	Resistant
K0394934_1610	DHFR	108	S	N	Resistant
K0394934_1610	DHPS	437	A	G	Resistant
K0394934_1610	MDR1	86	N	N	WT
K0394938_1611	CRT	76	K	T	Resistant
K0394938_1611	DHFR	108	S	N	Resistant
K0394938_1611	DHPS	437	A	A	WT
K0394938_1611	MDR1	86	N	N	WT
K0405016_1611	CRT	76	K	T	Resistant
K0405016_1611	DHFR	108	S	N	Resistant
K0405016_1611	MDR1	86	N	N	WT
K0415108_1701	CRT	76	K	T	Resistant
K0415108_1701	MDR1	86	N	N	WT
K0415108_1702	CRT	76	K	T	Resistant
K0415108_1702	DHPS	437	A	A	WT
K0415108_1702	MDR1	86	N	N	WT
K0415109_1603	CRT	76	K	T	Resistant
K0415109_1603	DHPS	437	A	A	WT
K0415109_1603	MDR1	86	N	N	WT
K0425208_1512	CRT	76	K	T	Resistant
K0425208_1512	DHFR	108	S	N	Resistant
K0425208_1512	DHPS	437	A	G	Resistant
K0425208_1512	MDR1	86	N	Y	Resistant
K0425208_1605	CRT	76	K	K,T	Mixed
K0425208_1605	DHFR	108	S	N	Resistant
K0425216_1511	DHFR	108	S	N	Resistant
K0425216_1511	DHPS	437	A	G	Resistant
N0050505_1610	CRT	76	K	T	Resistant
N0050505_1610	DHPS	437	A	A	WT
N0111111_1607	DHFR	108	S	N	Resistant
N0111111_1607	DHPS	437	A	G	Resistant
N0111111_1607	MDR1	86	N	N	WT
N0111112_1610	DHFR	108	S	N	Resistant
N0111112_1610	DHPS	437	A	A	WT
N0111114_1611	CRT	76	K	K	WT
N0111114_1611	DHFR	108	S	N	Resistant
N0111114_1611	DHPS	437	A	A	WT
N0111114_1611	MDR1	86	N	N	WT
N0121205_1611	DHFR	108	S	N	Resistant
N0121205_1611	MDR1	86	N	N	WT
N0131303_1612	CRT	76	K	K	WT
N0131303_1612	DHPS	437	A	A	WT
N0131303_1701	CRT	76	K	T	Resistant
N0131303_1701	DHFR	108	S	N	Resistant
N0131303_1701	MDR1	86	N	N	WT
N0131303_1703	CRT	76	K	T	Resistant
N0131303_1703	DHFR	108	S	N	Resistant
N0131303_1705	CRT	76	K	T	Resistant
N0131303_1705	DHFR	108	S	N	Resistant
N0131303_1705	DHPS	437	A	A	WT
N0131310_1611	DHPS	437	A	A	WT
N0131318_1611	DHPS	437	A	A	WT
N0131318_1611	MDR1	86	N	N	WT
N0131318_1701	CRT	76	K	K,T	Mixed
N0131318_1701	DHPS	437	A	A	WT
N0131318_1701	MDR1	86	N	Y	Resistant
N0131323_1610	CRT	76	K	T	Resistant
N0131323_1610	DHFR	108	S	N	Resistant
N0131323_1610	DHPS	437	A	A	WT
N0131323_1610	MDR1	86	N	N	WT
N0141403_1612	CRT	76	K	T	Resistant
N0141403_1612	DHFR	108	S	N	Resistant
N0141403_1612	MDR1	86	N	N	WT
P0010104_1611	DHFR	108	S	N	Resistant
P0010104_1611	DHPS	437	A	A	WT
P0010104_1611	MDR1	86	N	N	WT
P0010112_1611	CRT	76	K	T	Resistant
P0010112_1611	DHFR	108	S	N	Resistant
P0010112_1611	DHPS	437	A	A	WT
P0010116_1607	CRT	76	K	K	WT
P0010116_1607	DHFR	108	S	N	Resistant
P0010116_1607	DHPS	437	A	A	WT
P0010116_1607	MDR1	86	N	N	WT
P0010121_1607	CRT	76	K	K	WT
P0010121_1607	DHFR	108	S	N	Resistant
P0010121_1607	DHPS	437	A	A	WT
P0010121_1607	MDR1	86	N	N	WT
P0010121_1611	DHFR	108	S	N	Resistant
P0010121_1611	DHPS	437	A	A	WT
P0010123_1610	CRT	76	K	T	Resistant
P0010123_1610	DHFR	108	S	N	Resistant
P0010123_1610	MDR1	86	N	Y	Resistant
P0010126_1611	CRT	76	K	T	Resistant
P0010126_1611	DHFR	108	S	N	Resistant
P0010126_1611	DHPS	437	A	G	Resistant
P0010127_1610	CRT	76	K	K	WT
P0010127_1610	DHFR	108	S	N	Resistant
P0010127_1610	DHPS	437	A	A	WT
P0010127_1610	MDR1	86	N	N	WT
P0010137_1610	DHFR	108	S	N	Resistant
P0010137_1610	MDR1	86	N	N	WT
P0020206_1607	DHPS	437	A	G	Resistant
P0020206_1701	CRT	76	K	T	Resistant
P0020206_1701	DHPS	437	A	A	WT
P0020206_1701	MDR1	86	N	N	WT
P0020206_1702	CRT	76	K	T	Resistant
P0020206_1702	DHPS	437	A	A	WT
P0020206_1702	MDR1	86	N	N	WT
P0020206_1703	CRT	76	K	T	Resistant
P0020206_1703	DHFR	108	S	N	Resistant
P0020206_1703	DHPS	437	A	A	WT
P0020206_1703	MDR1	86	N	N	WT
P0020206_1704	CRT	76	K	T	Resistant
P0020206_1704	DHFR	108	S	N	Resistant
P0020206_1704	DHPS	437	A	A	WT
P0020206_1704	MDR1	86	N	N	WT
P0020206_1705	CRT	76	K	T	Resistant
P0020206_1705	DHFR	108	S	N	Resistant
P0020206_1705	DHPS	437	A	A	WT
P0020206_1705	MDR1	86	N	N	WT
P0020208_1607	CRT	76	K	T	Resistant
P0020208_1607	DHFR	108	S	N	Resistant
P0020208_1607	DHPS	437	A	G	Resistant
P0020208_1607	MDR1	86	N	N	WT
P0020213_1612	CRT	76	K	K	WT
P0020213_1612	DHPS	437	A	A	WT
P0020213_1612	MDR1	86	N	N	WT
P0020213_1701	CRT	76	K	K	WT
P0020213_1701	DHFR	108	S	N	Resistant
P0020213_1701	DHPS	437	A	A	WT
P0020213_1701	MDR1	86	N	N	WT
P0020213_1704	DHPS	437	A	A	WT
P0020213_1704	MDR1	86	N	N	WT
P0020213_1705	CRT	76	K	K	WT
P0020213_1705	DHPS	437	A	A	WT
P0020213_1705	MDR1	86	N	N	WT
P0020214_1607	DHFR	108	S	N	Resistant
P0020214_1607	DHPS	437	A	A	WT
P0020214_1607	MDR1	86	N	N	WT
P0020214_1612	CRT	76	K	T	Resistant
P0020214_1701	CRT	76	K	T	Resistant
P0020214_1701	DHFR	108	S	N	Resistant
P0020214_1701	MDR1	86	N	N	WT
P0020215_1607	CRT	76	K	T	Resistant
P0020215_1607	DHFR	108	S	N	Resistant
P0020215_1607	DHPS	437	A	A	WT
P0020215_1612	DHPS	437	A	A	WT
P0020215_1612	MDR1	86	N	N	WT
P0020215_1701	CRT	76	K	T	Resistant
P0020215_1701	DHPS	437	A	A	WT
P0020215_1701	MDR1	86	N	N	WT
P0030304_1607	CRT	76	K	T	Resistant
P0030304_1607	DHFR	108	S	N	Resistant
P0030304_1607	DHPS	437	A	A	WT
P0050504_1611	CRT	76	K	T	Resistant
P0050504_1611	DHFR	108	S	N	Resistant
P0050504_1611	MDR1	86	N	N	WT
P0050505_1611	DHFR	108	S	N	Resistant
P0050514_1611	CRT	76	K	T	Resistant
P0050514_1611	DHFR	108	S	N	Resistant
P0050514_1611	DHPS	437	A	A	WT
P0050514_1611	MDR1	86	N	N	WT
P0050519_1701	DHFR	108	S	N	Resistant
P0050519_1701	DHPS	437	A	A	WT
P0050519_1701	MDR1	86	N	N	WT
P0050519_1703	CRT	76	K	T	Resistant
P0050519_1703	DHFR	108	S	S	WT
P0050519_1703	DHPS	437	A	A	WT
P0050519_1703	MDR1	86	N	N	WT
P0050519_1704	CRT	76	K	T	Resistant
P0050519_1704	DHFR	108	S	N	Resistant
P0050519_1704	DHPS	437	A	A	WT
P0050519_1704	MDR1	86	N	N	WT
P0050519_1705	CRT	76	K	T	Resistant
P0050519_1705	DHFR	108	S	N	Resistant
P0050519_1705	DHPS	437	A	A	WT
P0050519_1705	MDR1	86	N	N	WT
P0060606_1607	CRT	76	K	K	WT
P0060606_1607	DHFR	108	S	N	Resistant
P0060606_1607	DHPS	437	A	A	WT
P0060606_1607	MDR1	86	N	N	WT
P0060609_1611	DHFR	108	S	N	Resistant
P0060609_1611	DHPS	437	A	A	WT
P0060609_1611	MDR1	86	N	N	WT
P0060616_1611	DHFR	108	S	N	Resistant
P0060616_1611	MDR1	86	N	N	WT
P0060620_1611	CRT	76	K	T	Resistant
P0060620_1611	DHFR	108	S	N	Resistant
P0060620_1611	DHPS	437	A	A	WT
P0060620_1611	MDR1	86	N	N	WT
P0060622_1611	CRT	76	K	T	Resistant
P0060622_1611	DHFR	108	S	N	Resistant
P0060622_1611	DHPS	437	A	A	WT
P0060622_1611	MDR1	86	N	N	WT
P0060623_1607	DHFR	108	S	S	WT
P0060623_1607	DHPS	437	A	A	WT
P0060623_1612	CRT	76	K	T	Resistant
P0060623_1612	DHFR	108	S	N	Resistant
P0060623_1612	DHPS	437	A	A	WT
P0060623_1612	MDR1	86	N	N	WT
P0060623_1701	CRT	76	K	T	Resistant
P0060623_1701	DHPS	437	A	A	WT
P0060623_1702	CRT	76	K	T	Resistant
P0060623_1702	DHPS	437	A	A	WT
P0060623_1702	MDR1	86	N	N	WT
P0060623_1703	CRT	76	K	T	Resistant
P0060623_1703	DHFR	108	S	N	Resistant
P0060623_1703	DHPS	437	A	A	WT
P0060623_1703	MDR1	86	N	N	WT
P0060623_1704	CRT	76	K	T	Resistant
P0060623_1704	DHFR	108	S	N	Resistant
P0060623_1704	DHPS	437	A	A	WT
P0060623_1704	MDR1	86	N	N	WT
P0060623_1705	CRT	76	K	T	Resistant
P0060623_1705	DHPS	437	A	A	WT
P0060623_1705	MDR1	86	N	N	WT
P0070701_1611	CRT	76	K	T	Resistant
P0070701_1611	MDR1	86	N	N	WT
P0070705_1611	CRT	76	K	T	Resistant
P0070705_1611	DHFR	108	S	N	Resistant
P0070705_1611	DHPS	437	A	A	WT
P0070705_1611	MDR1	86	N	N	WT
P0070707_1610	CRT	76	K	K	WT
P0070707_1610	DHFR	108	S	N	Resistant
P0070710_1607	DHFR	108	S	N	Resistant
P0070710_1607	DHPS	437	A	A	WT
P0070710_1607	MDR1	86	N	N	WT
P0070711_1611	CRT	76	K	T	Resistant
P0070711_1611	DHPS	437	A	A	WT
P0070722_1612	CRT	76	K	T	Resistant
P0070722_1612	DHFR	108	S	N	Resistant
P0070722_1612	DHPS	437	A	A	WT
P0070722_1612	MDR1	86	N	N	WT
P0070722_1701	CRT	76	K	T	Resistant
P0070722_1701	DHPS	437	A	A	WT
P0070722_1701	MDR1	86	N	N	WT
P0070722_1702	CRT	76	K	T	Resistant
P0070722_1702	DHPS	437	A	A	WT
P0070722_1702	MDR1	86	N	N	WT
P0070724_1610	DHPS	437	A	A	WT
P0080805_1612	CRT	76	K	K	WT
P0080805_1612	DHPS	437	A	G	Resistant
P0080805_1612	MDR1	86	N	N	WT
P0080805_1701	DHPS	437	A	A	WT
P0080805_1701	MDR1	86	N	N	WT
P0080805_1702	CRT	76	K	K	WT
P0080805_1702	DHFR	108	S	N	Resistant
P0080805_1702	DHPS	437	A	A	WT
P0080805_1702	MDR1	86	N	N	WT
P0080805_1704	CRT	76	K	K	WT
P0080805_1704	DHFR	108	S	S	WT
P0080805_1704	DHPS	437	A	A	WT
P0080805_1704	MDR1	86	N	N	WT
P0080805_1705	CRT	76	K	K	WT
P0080805_1705	DHFR	108	S	N	Resistant
P0080805_1705	MDR1	86	N	N	WT
P0080811_1701	DHFR	108	S	N	Resistant
P0080811_1701	MDR1	86	N	N	WT
P0080811_1703	CRT	76	K	K	WT
P0080811_1703	DHFR	108	S	N	Resistant
P0080811_1703	DHPS	437	A	A	WT
P0080811_1704	DHPS	437	A	A	WT
P0080811_1704	MDR1	86	N	N	WT
P0080824_1607	CRT	76	K	T	Resistant
P0080824_1607	DHFR	108	S	N	Resistant
P0080824_1607	DHPS	437	A	A	WT
P0080824_1607	MDR1	86	N	N	WT
P0080835_1705	CRT	76	K	T	Resistant
P0080835_1705	DHFR	108	S	N	Resistant
P0080835_1705	DHPS	437	A	A	WT
P0080836_1612	CRT	76	K	T	Resistant
P0080836_1612	DHPS	437	A	A	WT
P0080836_1612	MDR1	86	N	N	WT
P0080836_1701	CRT	76	K	T	Resistant
P0080836_1701	MDR1	86	N	N	WT
P0080840_1611	DHFR	108	S	N	Resistant
P0080842_1607	CRT	76	K	K	WT
P0080842_1607	DHFR	108	S	N	Resistant
P0080842_1607	DHPS	437	A	A	WT
P0080842_1607	MDR1	86	N	N	WT
P0080842_1612	CRT	76	K	T	Resistant
P0080842_1612	DHPS	437	A	A	WT
P0080842_1612	MDR1	86	N	N	WT
P0080842_1701	DHPS	437	A	A	WT
P0080842_1701	MDR1	86	N	N	WT
P0080842_1703	CRT	76	K	T	Resistant
P0080842_1703	DHFR	108	S	N	Resistant
P0080842_1703	DHPS	437	A	A	WT
P0080842_1703	MDR1	86	N	N	WT
P0080842_1704	CRT	76	K	T	Resistant
P0080842_1704	DHFR	108	S	N	Resistant
P0080842_1704	DHPS	437	A	A	WT
P0080842_1704	MDR1	86	N	N	WT
P0080842_1705	DHPS	437	A	A	WT
P0080842_1705	MDR1	86	N	N	WT
P0080843_1611	CRT	76	K	T	Resistant
P0080843_1611	DHFR	108	S	N	Resistant
P0080843_1611	DHPS	437	A	A	WT
P0080843_1611	MDR1	86	N	N	WT
P0080854_1611	CRT	76	K	T	Resistant
P0080854_1611	DHFR	108	S	N	Resistant
P0080854_1611	MDR1	86	N	N	WT
P0080857_1702	CRT	76	K	T	Resistant
P0080857_1702	DHFR	108	S	N	Resistant
P0080857_1702	DHPS	437	A	A	WT
P0080857_1702	MDR1	86	N	N	WT
P0080858_1607	CRT	76	K	T	Resistant
P0080858_1607	DHFR	108	S	N	Resistant
P0080858_1607	DHPS	437	A	G	Resistant
P0080858_1607	MDR1	86	N	N	WT
P0080867_1607	DHFR	108	S	N	Resistant
P0080867_1607	DHPS	437	A	A	WT
P0080867_1607	MDR1	86	N	N	WT
P0080880_1612	CRT	76	K	T	Resistant
P0080880_1612	DHPS	437	A	A	WT
P0080880_1612	MDR1	86	N	N	WT
P0080880_1702	CRT	76	K	T	Resistant
P0080880_1702	DHFR	108	S	N	Resistant
P0080880_1702	DHPS	437	A	A	WT
P0090904_1610	DHFR	108	S	N	Resistant
P0090904_1610	DHPS	437	A	A	WT
P0090907_1701	CRT	76	K	T	Resistant
P0090907_1701	DHPS	437	A	A	WT
P0111104_1611	CRT	76	K	T	Resistant
P0111104_1611	DHFR	108	S	N	Resistant
P0111104_1611	DHPS	437	A	A	WT
P0111104_1611	MDR1	86	N	N	WT
P0111105_1701	CRT	76	K	T	Resistant
P0111105_1701	DHFR	108	S	N	Resistant
P0111105_1701	MDR1	86	N	N	WT
P0111106_1611	CRT	76	K	T	Resistant
P0111106_1611	DHFR	108	S	N	Resistant
P0111106_1611	DHPS	437	A	A	WT
P0111106_1611	MDR1	86	N	N	WT
P0121204_1612	CRT	76	K	K	WT
P0121204_1612	MDR1	86	N	N	WT
P0121204_1701	CRT	76	K	K	WT
P0121204_1701	MDR1	86	N	N	WT
P0121204_1703	DHFR	108	S	N	Resistant
P0121204_1703	MDR1	86	N	N	WT
P0121204_1704	DHPS	437	A	A	WT
P0121204_1704	MDR1	86	N	N	WT
P0121204_1705	CRT	76	K	K	WT
P0121204_1705	DHPS	437	A	A	WT
P0121204_1705	MDR1	86	N	N	WT
