# Supplementary material for: Household clustering and seasonal genetic variation of Plasmodium falciparum at the community-level in The Gambia
Source: eLife. 2025 May 27;13:RP103047. doi: 10.7554/eLife.103047 (PMC12113269; doi:10.7554/eLife.103047)
Supplement: Supplementary file 9. [file elife-103047-supp9.xlsx]

## Sheet: TS9 - DR markers (genomes)
Genome_ID	Protein	Position	WT Allele	Sample Alleles	Genotype
J0010103_1412	AAT1	258	S	L	Resistant
J0010103_1412	CRT	76	K	K,T	Mixed
J0010103_1412	DHFR	108	S	N	Resistant
J0010103_1412	DHPS	437	A	G	Resistant
J0010103_1412	K13	580	C	C	WT
J0010103_1412	MDR1	86	N	N	WT
J0020302_1506	AAT1	258	S	S	WT
J0020302_1506	CRT	76	K	T	Resistant
J0020302_1506	DHFR	108	S	N	Resistant
J0020302_1506	DHPS	437	A	G	Resistant
J0020302_1506	K13	580	C	C	WT
J0020302_1506	MDR1	86	N	Y	Resistant
J0030406_1701	AAT1	258	S	L	Resistant
J0030406_1701	CRT	76	K	T	Resistant
J0030406_1701	DHFR	108	S	N	Resistant
J0030406_1701	DHPS	437	A	G	Resistant
J0030406_1701	K13	580	C	C	WT
J0030406_1701	MDR1	86	N	Y	Resistant
J0030406_1702	AAT1	258	S	L	Resistant
J0030406_1702	CRT	76	K	T	Resistant
J0030406_1702	DHFR	108	S	N	Resistant
J0030406_1702	DHPS	437	A	G	Resistant
J0030406_1702	K13	580	C	C	WT
J0030406_1702	MDR1	86	N	Y	Resistant
J0030406_1705	AAT1	258	S	L	Resistant
J0030406_1705	CRT	76	K	T	Resistant
J0030406_1705	DHFR	108	S	N	Resistant
J0030406_1705	DHPS	437	A	G	Resistant
J0030406_1705	K13	580	C	C	WT
J0030406_1705	MDR1	86	N	Y	Resistant
J0030409_1610	AAT1	258	S	L	Resistant
J0030409_1610	CRT	76	K	T	Resistant
J0030409_1610	DHFR	108	S	N	Resistant
J0030409_1610	DHPS	437	A	G	Resistant
J0030409_1610	K13	580	C	C	WT
J0030409_1610	MDR1	86	N	N	WT
J0050605_1412	AAT1	258	S	S	WT
J0050607_1412	AAT1	258	S	L	Resistant
J0050607_1412	CRT	76	K	T	Resistant
J0050607_1412	DHFR	108	S	N	Resistant
J0050607_1412	DHPS	437	A	G	Resistant
J0050607_1412	K13	580	C	C	WT
J0050607_1412	MDR1	86	N	N	WT
J0050607_1611	DHPS	437	A	G	Resistant
J0050611_1611	AAT1	258	S	L	Resistant
J0050611_1611	CRT	76	K	T	Resistant
J0050611_1611	DHFR	108	S	N	Resistant
J0050611_1611	DHPS	437	A	G	Resistant
J0050611_1611	K13	580	C	C	WT
J0050611_1611	MDR1	86	N	Y	Resistant
J0050617_1611	AAT1	258	S	L	Resistant
J0050617_1611	CRT	76	K	T	Resistant
J0050617_1611	DHFR	108	S	N	Resistant
J0050617_1611	DHPS	437	A	A	WT
J0050617_1611	K13	580	C	C	WT
J0050617_1611	MDR1	86	N	N	WT
J0060701_1511	AAT1	258	S	L	Resistant
J0060701_1511	CRT	76	K	T	Resistant
J0060701_1511	DHFR	108	S	N	Resistant
J0060701_1511	DHPS	437	A	A	WT
J0060701_1511	K13	580	C	C	WT
J0060701_1511	MDR1	86	N	N	WT
J0070804_1610	AAT1	258	S	L	Resistant
J0070804_1610	CRT	76	K	K	WT
J0070804_1610	DHPS	437	A	G	Resistant
J0070804_1610	MDR1	86	N	N	WT
J0101102_1412	DHFR	108	S	S	WT
J0101102_1412	MDR1	86	N	N	WT
J0101103_1701	AAT1	258	S	L	Resistant
J0101103_1701	CRT	76	K	T	Resistant
J0101103_1701	DHFR	108	S	N	Resistant
J0101103_1701	DHPS	437	A	G	Resistant
J0101103_1701	K13	580	C	C	WT
J0101103_1701	MDR1	86	N	N	WT
J0101103_1702	AAT1	258	S	L	Resistant
J0101103_1702	CRT	76	K	T	Resistant
J0101103_1702	DHFR	108	S	N	Resistant
J0101103_1702	DHPS	437	A	G	Resistant
J0101103_1702	K13	580	C	C	WT
J0101103_1702	MDR1	86	N	N	WT
J0101103_1703	AAT1	258	S	L	Resistant
J0101103_1703	DHPS	437	A	G	Resistant
J0111201_1412	AAT1	258	S	S	WT
J0111201_1412	DHFR	108	S	S	WT
J0111201_1412	DHPS	437	A	G	Resistant
J0111208_1610	AAT1	258	S	L	Resistant
J0111208_1610	CRT	76	K	T	Resistant
J0111208_1610	DHFR	108	S	N	Resistant
J0111208_1610	DHPS	437	A	G	Resistant
J0111208_1610	K13	580	C	C	WT
J0111208_1610	MDR1	86	N	Y	Resistant
J0131403_1511	AAT1	258	S	L	Resistant
J0131403_1511	CRT	76	K	K	WT
J0131403_1511	DHFR	108	S	N	Resistant
J0131403_1511	DHPS	437	A	A	WT
J0131403_1511	K13	580	C	C	WT
J0131403_1511	MDR1	86	N	N	WT
J0131406_1512	AAT1	258	S	S	WT
J0131406_1512	CRT	76	K	K	WT
J0131406_1512	DHFR	108	S	N	Resistant
J0131406_1512	DHPS	437	A	G	Resistant
J0131406_1512	K13	580	C	C	WT
J0131406_1512	MDR1	86	N	N	WT
J0141503_1511	AAT1	258	S	L	Resistant
J0141503_1511	CRT	76	K	T	Resistant
J0141503_1511	DHFR	108	S	N	Resistant
J0141503_1511	DHPS	437	A	G	Resistant
J0141503_1511	K13	580	C	C	WT
J0141503_1511	MDR1	86	N	Y	Resistant
J0151608_1701	AAT1	258	S	L	Resistant
J0151608_1701	CRT	76	K	T	Resistant
J0151608_1701	DHFR	108	S	N	Resistant
J0151608_1701	DHPS	437	A	G	Resistant
J0151608_1701	K13	580	C	C	WT
J0151608_1701	MDR1	86	N	Y	Resistant
J0151612_1511	AAT1	258	S	L	Resistant
J0151612_1511	CRT	76	K	K,T	Mixed
J0151612_1511	DHFR	108	S	N	Resistant
J0151612_1511	DHPS	437	A	G,A	Mixed
J0151612_1511	K13	580	C	C	WT
J0151612_1511	MDR1	86	N	N	WT
J0171802_1611	AAT1	258	S	L	Resistant
J0171802_1611	CRT	76	K	T	Resistant
J0171802_1611	DHFR	108	S	N	Resistant
J0171802_1611	DHPS	437	A	A	WT
J0171802_1611	K13	580	C	C	WT
J0171802_1611	MDR1	86	N	N	WT
J0171804_1610	AAT1	258	S	L	Resistant
J0171804_1610	CRT	76	K	K	WT
J0171804_1610	DHFR	108	S	N	Resistant
J0171804_1610	DHPS	437	A	G	Resistant
J0171804_1610	K13	580	C	C	WT
J0171805_1611	AAT1	258	S	S,L	Mixed
J0171805_1611	CRT	76	K	T	Resistant
J0171805_1611	DHFR	108	S	N	Resistant
J0171805_1611	DHPS	437	A	G	Resistant
J0171805_1611	K13	580	C	C	WT
J0171805_1611	MDR1	86	N	N	WT
J0171806_1511	AAT1	258	S	L	Resistant
J0171806_1511	CRT	76	K	T	Resistant
J0171806_1511	DHFR	108	S	N	Resistant
J0171806_1511	DHPS	437	A	G	Resistant
J0171806_1511	K13	580	C	C	WT
J0171806_1511	MDR1	86	N	N	WT
J0181911_1611	AAT1	258	S	L	Resistant
J0181911_1611	CRT	76	K	T	Resistant
J0181911_1611	DHFR	108	S	N	Resistant
J0181911_1611	DHPS	437	A	G	Resistant
J0181911_1611	K13	580	C	C	WT
J0181911_1611	MDR1	86	N	Y	Resistant
J0242509_1611	AAT1	258	S	L	Resistant
J0242509_1611	CRT	76	K	K	WT
J0242509_1611	DHFR	108	S	N	Resistant
J0242509_1611	DHPS	437	A	G	Resistant
J0242509_1611	K13	580	C	C	WT
J0242509_1611	MDR1	86	N	N	WT
J0242517_1611	AAT1	258	S	L	Resistant
J0242517_1611	CRT	76	K	T	Resistant
J0242517_1611	DHFR	108	S	N	Resistant
J0242517_1611	DHPS	437	A	G	Resistant
J0262707_1412	AAT1	258	S	L	Resistant
J0262707_1412	CRT	76	K	T	Resistant
J0262707_1412	DHFR	108	S	N	Resistant
J0262707_1412	DHPS	437	A	A	WT
J0262707_1412	K13	580	C	C	WT
J0262707_1412	MDR1	86	N	N	WT
J0262723_1511	AAT1	258	S	L	Resistant
J0262723_1511	CRT	76	K	K	WT
J0262723_1511	DHFR	108	S	N	Resistant
J0262723_1511	DHPS	437	A	G	Resistant
J0262723_1511	K13	580	C	C	WT
J0262723_1511	MDR1	86	N	N	WT
J0262731_1412	AAT1	258	S	L	Resistant
J0262731_1412	CRT	76	K	T	Resistant
J0262731_1412	DHFR	108	S	N	Resistant
J0262731_1412	DHPS	437	A	A	WT
J0262731_1412	K13	580	C	C	WT
J0262731_1412	MDR1	86	N	N	WT
J0272803_1512	AAT1	258	S	L	Resistant
J0272803_1512	CRT	76	K	T	Resistant
J0272803_1512	DHFR	108	S	N	Resistant
J0272803_1512	DHPS	437	A	G	Resistant
J0272803_1512	K13	580	C	C	WT
J0272803_1512	MDR1	86	N	N,Y	Mixed
J0272804_1511	AAT1	258	S	L	Resistant
J0272804_1511	CRT	76	K	T	Resistant
J0272804_1511	DHFR	108	S	N	Resistant
J0272804_1511	DHPS	437	A	A	WT
J0272804_1511	K13	580	C	C	WT
J0272804_1511	MDR1	86	N	N	WT
J0272809_1611	AAT1	258	S	L	Resistant
J0272809_1611	CRT	76	K	K	WT
J0272809_1611	DHFR	108	S	N	Resistant
J0272809_1611	DHPS	437	A	G	Resistant
J0272809_1611	MDR1	86	N	N	WT
J0272809_1612	AAT1	258	S	L	Resistant
J0272809_1612	CRT	76	K	K	WT
J0272809_1612	DHFR	108	S	N	Resistant
J0272809_1612	DHPS	437	A	G	Resistant
J0272809_1612	K13	580	C	C	WT
J0272809_1612	MDR1	86	N	N	WT
J0272812_1611	AAT1	258	S	L	Resistant
J0272812_1611	CRT	76	K	K	WT
J0272812_1611	DHFR	108	S	N	Resistant
J0272812_1611	DHPS	437	A	G	Resistant
J0272812_1611	K13	580	C	C	WT
J0272812_1611	MDR1	86	N	N	WT
J0272813_1610	AAT1	258	S	L	Resistant
J0272813_1610	DHPS	437	A	G	Resistant
J0272813_1610	K13	580	C	C	WT
J0272813_1611	AAT1	258	S	L	Resistant
J0272813_1611	CRT	76	K	K	WT
J0272813_1611	DHFR	108	S	N	Resistant
J0272813_1611	DHPS	437	A	G	Resistant
J0272813_1611	K13	580	C	C	WT
J0272813_1611	MDR1	86	N	N	WT
J0272813_1612	AAT1	258	S	L	Resistant
J0272813_1612	CRT	76	K	K	WT
J0272813_1612	DHFR	108	S	N	Resistant
J0272813_1612	DHPS	437	A	G	Resistant
J0272813_1612	K13	580	C	C	WT
J0272813_1612	MDR1	86	N	N	WT
J0272813_1701	AAT1	258	S	L	Resistant
J0272813_1701	CRT	76	K	K	WT
J0272813_1701	DHFR	108	S	N	Resistant
J0272813_1701	DHPS	437	A	G	Resistant
J0272813_1701	K13	580	C	C	WT
J0272813_1701	MDR1	86	N	N	WT
J0272813_1702	AAT1	258	S	L	Resistant
J0272813_1702	CRT	76	K	K	WT
J0272813_1702	DHFR	108	S	N	Resistant
J0272813_1702	DHPS	437	A	G	Resistant
J0272813_1702	K13	580	C	C	WT
J0272813_1702	MDR1	86	N	N	WT
J0272813_1703	AAT1	258	S	L	Resistant
J0272813_1703	CRT	76	K	K	WT
J0272813_1703	DHFR	108	S	N	Resistant
J0272813_1703	DHPS	437	A	G	Resistant
J0272813_1703	K13	580	C	C	WT
J0272813_1703	MDR1	86	N	N	WT
J0272813_1705	AAT1	258	S	L	Resistant
J0272813_1705	CRT	76	K	K	WT
J0272813_1705	DHFR	108	S	N	Resistant
J0272813_1705	DHPS	437	A	G	Resistant
J0272813_1705	K13	580	C	C	WT
J0272813_1705	MDR1	86	N	N	WT
J0272815_1611	AAT1	258	S	L	Resistant
J0272815_1611	CRT	76	K	K	WT
J0272815_1611	DHFR	108	S	N	Resistant
J0272815_1611	DHPS	437	A	G	Resistant
J0272815_1611	K13	580	C	C	WT
J0272815_1611	MDR1	86	N	N	WT
J0272815_1701	AAT1	258	S	L	Resistant
J0272815_1701	CRT	76	K	K	WT
J0272815_1701	DHFR	108	S	N	Resistant
J0272815_1701	DHPS	437	A	G	Resistant
J0272815_1701	K13	580	C	C	WT
J0272815_1701	MDR1	86	N	N	WT
J0272815_1702	AAT1	258	S	L	Resistant
J0272815_1702	CRT	76	K	K	WT
J0272815_1702	DHFR	108	S	N	Resistant
J0272815_1702	DHPS	437	A	G	Resistant
J0272815_1702	K13	580	C	C	WT
J0272815_1702	MDR1	86	N	N	WT
J0272815_1703	AAT1	258	S	L	Resistant
J0272815_1703	CRT	76	K	K	WT
J0272815_1703	DHFR	108	S	N	Resistant
J0272815_1703	DHPS	437	A	G	Resistant
J0272815_1703	K13	580	C	C	WT
J0272815_1703	MDR1	86	N	N	WT
J0282915_1511	CRT	76	K	K	WT
J0282915_1511	K13	580	C	C	WT
J0282916_1701	AAT1	258	S	L	Resistant
J0282916_1701	CRT	76	K	K,T	Mixed
J0282916_1701	DHFR	108	S	N	Resistant
J0282916_1701	DHPS	437	A	G,A	Mixed
J0282916_1701	K13	580	C	C	WT
J0282916_1701	MDR1	86	N	N,Y	Mixed
J0282916_1702	AAT1	258	S	L	Resistant
J0282916_1702	CRT	76	K	T	Resistant
J0282916_1702	DHFR	108	S	N	Resistant
J0282916_1702	DHPS	437	A	A	WT
J0282916_1702	K13	580	C	C	WT
J0282916_1702	MDR1	86	N	Y	Resistant
J0282916_1703	CRT	76	K	K	WT
J0282916_1703	DHFR	108	S	N	Resistant
J0282916_1703	DHPS	437	A	G	Resistant
J0282916_1703	K13	580	C	C	WT
J0282916_1705	CRT	76	K	T	Resistant
J0282916_1705	DHFR	108	S	N	Resistant
K0010101_1611	AAT1	258	S	L	Resistant
K0010101_1611	CRT	76	K	T	Resistant
K0010101_1611	DHFR	108	S	N	Resistant
K0010101_1611	DHPS	437	A	G	Resistant
K0010101_1611	K13	580	C	C	WT
K0010101_1611	MDR1	86	N	N	WT
K0010105_1506	AAT1	258	S	L	Resistant
K0010105_1506	CRT	76	K	K	WT
K0010105_1506	DHFR	108	S	N	Resistant
K0010105_1506	DHPS	437	A	G	Resistant
K0010105_1506	K13	580	C	C	WT
K0010105_1506	MDR1	86	N	N	WT
K0022008_1512	AAT1	258	S	L	Resistant
K0022008_1512	CRT	76	K	T	Resistant
K0022008_1512	DHFR	108	S	N	Resistant
K0022008_1512	DHPS	437	A	A	WT
K0022008_1512	K13	580	C	C	WT
K0022008_1512	MDR1	86	N	N	WT
K0030301_1504	AAT1	258	S	L	Resistant
K0030301_1504	CRT	76	K	T	Resistant
K0030301_1504	DHFR	108	S	N	Resistant
K0030301_1504	DHPS	437	A	A	WT
K0030302_1512	AAT1	258	S	L	Resistant
K0030302_1512	CRT	76	K	T	Resistant
K0030302_1512	DHFR	108	S	N	Resistant
K0030302_1512	DHPS	437	A	A	WT
K0030302_1512	K13	580	C	C	WT
K0030302_1512	MDR1	86	N	N	WT
K0030302_1610	AAT1	258	S	L	Resistant
K0030302_1610	CRT	76	K	T	Resistant
K0030302_1610	DHFR	108	S	N	Resistant
K0030302_1610	DHPS	437	A	G	Resistant
K0030302_1610	K13	580	C	C	WT
K0030302_1610	MDR1	86	N	N	WT
K0030302_1611	AAT1	258	S	L	Resistant
K0030302_1611	CRT	76	K	T	Resistant
K0030302_1611	DHFR	108	S	N	Resistant
K0030302_1611	DHPS	437	A	G,A	Mixed
K0030302_1611	K13	580	C	C	WT
K0030302_1611	MDR1	86	N	N	WT
K0030303_1512	AAT1	258	S	L	Resistant
K0030303_1512	CRT	76	K	K	WT
K0030303_1512	DHFR	108	S	N	Resistant
K0030303_1512	DHPS	437	A	G,A	Mixed
K0030303_1512	K13	580	C	C	WT
K0030303_1512	MDR1	86	N	N	WT
K0030303_1605	AAT1	258	S	L	Resistant
K0030303_1605	CRT	76	K	K	WT
K0030303_1605	DHFR	108	S	N	Resistant
K0030303_1605	DHPS	437	A	A	WT
K0030303_1605	K13	580	C	C	WT
K0030303_1605	MDR1	86	N	N	WT
K0030303_1612	AAT1	258	S	L	Resistant
K0030303_1612	CRT	76	K	T	Resistant
K0030303_1612	DHFR	108	S	N	Resistant
K0030303_1612	DHPS	437	A	G	Resistant
K0030303_1612	K13	580	C	C	WT
K0030303_1612	MDR1	86	N	N	WT
K0050502_1512	CRT	76	K	T	Resistant
K0050512_1611	AAT1	258	S	S	WT
K0050512_1611	CRT	76	K	T	Resistant
K0050512_1611	DHFR	108	S	N	Resistant
K0050512_1611	DHPS	437	A	A	WT
K0050512_1611	K13	580	C	C	WT
K0050512_1611	MDR1	86	N	N	WT
K0060617_1512	AAT1	258	S	S,L	Mixed
K0060617_1512	CRT	76	K	K	WT
K0060617_1512	DHFR	108	S	S,N	Mixed
K0060617_1512	DHPS	437	A	A	WT
K0060617_1512	K13	580	C	C	WT
K0060617_1512	MDR1	86	N	N	WT
K0060617_1603	AAT1	258	S	L	Resistant
K0060617_1603	CRT	76	K	T	Resistant
K0060617_1603	DHFR	108	S	N	Resistant
K0060617_1603	MDR1	86	N	N	WT
K0070714_1611	AAT1	258	S	L	Resistant
K0070714_1611	CRT	76	K	T	Resistant
K0070714_1611	DHFR	108	S	N	Resistant
K0070714_1611	DHPS	437	A	A	WT
K0070714_1611	K13	580	C	C	WT
K0070714_1611	MDR1	86	N	N	WT
K0080809_1702	AAT1	258	S	S	WT
K0080809_1702	CRT	76	K	T	Resistant
K0080809_1702	DHFR	108	S	N	Resistant
K0080809_1702	K13	580	C	C	WT
K0090903_1512	AAT1	258	S	L	Resistant
K0090903_1512	CRT	76	K	K	WT
K0090903_1512	DHFR	108	S	N	Resistant
K0090903_1512	DHPS	437	A	G	Resistant
K0090903_1512	K13	580	C	C	WT
K0090903_1512	MDR1	86	N	N	WT
K0090903_1605	AAT1	258	S	L	Resistant
K0090903_1605	CRT	76	K	K	WT
K0090903_1605	DHFR	108	S	N	Resistant
K0090903_1605	DHPS	437	A	G	Resistant
K0090903_1605	K13	580	C	C	WT
K0090903_1605	MDR1	86	N	N	WT
K0101005_1512	AAT1	258	S	L	Resistant
K0101005_1512	CRT	76	K	K	WT
K0101005_1512	DHFR	108	S	S	WT
K0101005_1512	DHPS	437	A	A	WT
K0101005_1512	K13	580	C	C	WT
K0101005_1512	MDR1	86	N	N	WT
K0101005_1701	DHFR	108	S	N	Resistant
K0101007_1412	AAT1	258	S	L	Resistant
K0101007_1412	CRT	76	K	T	Resistant
K0101007_1412	DHFR	108	S	N	Resistant
K0101007_1412	DHPS	437	A	A	WT
K0101007_1412	K13	580	C	C	WT
K0101007_1412	MDR1	86	N	N	WT
K0111111_1611	AAT1	258	S	L	Resistant
K0111111_1611	CRT	76	K	T	Resistant
K0111111_1611	DHFR	108	S	S	WT
K0111111_1611	DHPS	437	A	A	WT
K0111111_1611	K13	580	C	C	WT
K0111111_1611	MDR1	86	N	N	WT
K0141403_1504	AAT1	258	S	L	Resistant
K0141403_1504	CRT	76	K	T	Resistant
K0141403_1504	DHFR	108	S	N	Resistant
K0141403_1504	DHPS	437	A	A	WT
K0141403_1504	K13	580	C	C	WT
K0141403_1504	MDR1	86	N	N	WT
K0141403_1511	CRT	76	K	K	WT
K0141403_1511	DHPS	437	A	G	Resistant
K0161621_1506	DHPS	437	A	A	WT
K0171716_1612	AAT1	258	S	L	Resistant
K0171716_1612	CRT	76	K	T	Resistant
K0171716_1612	DHFR	108	S	N	Resistant
K0171716_1612	DHPS	437	A	A	WT
K0171716_1612	K13	580	C	C	WT
K0171716_1612	MDR1	86	N	N	WT
K0171716_1701	AAT1	258	S	L	Resistant
K0171716_1701	CRT	76	K	T	Resistant
K0171716_1701	DHFR	108	S	N	Resistant
K0171716_1701	DHPS	437	A	A	WT
K0171716_1701	K13	580	C	C	WT
K0171716_1701	MDR1	86	N	N	WT
K0171716_1702	AAT1	258	S	L	Resistant
K0171716_1702	CRT	76	K	T	Resistant
K0171716_1702	DHFR	108	S	N	Resistant
K0171716_1702	DHPS	437	A	A	WT
K0171716_1702	MDR1	86	N	N	WT
K0171716_1703	DHFR	108	S	N	Resistant
K0171716_1703	DHPS	437	A	A	WT
K0171722_1512	AAT1	258	S	S	WT
K0171722_1512	CRT	76	K	T	Resistant
K0171722_1512	DHFR	108	S	N	Resistant
K0171722_1512	DHPS	437	A	A	WT
K0171722_1512	K13	580	C	C	WT
K0171722_1512	MDR1	86	N	N	WT
K0171728_1512	AAT1	258	S	L	Resistant
K0171728_1512	CRT	76	K	K	WT
K0171728_1512	DHFR	108	S	N	Resistant
K0171728_1512	DHPS	437	A	A	WT
K0171728_1512	K13	580	C	C	WT
K0171728_1512	MDR1	86	N	N	WT
K0171732_1512	AAT1	258	S	L	Resistant
K0171732_1512	CRT	76	K	T	Resistant
K0171732_1512	DHFR	108	S	N	Resistant
K0171732_1512	DHPS	437	A	G	Resistant
K0171732_1512	K13	580	C	C	WT
K0171732_1512	MDR1	86	N	Y	Resistant
K0171738_1412	AAT1	258	S	L	Resistant
K0171738_1412	CRT	76	K	T	Resistant
K0171738_1412	DHFR	108	S	N	Resistant
K0171738_1412	DHPS	437	A	G	Resistant
K0171738_1412	K13	580	C	C	WT
K0171738_1412	MDR1	86	N	N	WT
K0181809_1512	AAT1	258	S	L	Resistant
K0181809_1512	CRT	76	K	K	WT
K0181809_1512	DHFR	108	S	S	WT
K0181809_1512	DHPS	437	A	A	WT
K0181809_1512	K13	580	C	C	WT
K0181809_1512	MDR1	86	N	N	WT
K0181810_1705	AAT1	258	S	L	Resistant
K0181810_1705	CRT	76	K	K	WT
K0181810_1705	DHFR	108	S	N	Resistant
K0181810_1705	DHPS	437	A	G	Resistant
K0181810_1705	K13	580	C	C	WT
K0202002_1512	AAT1	258	S	L	Resistant
K0202002_1512	CRT	76	K	T	Resistant
K0202002_1512	DHFR	108	S	S	WT
K0202002_1512	DHPS	437	A	G	Resistant
K0202002_1512	K13	580	C	C	WT
K0202002_1512	MDR1	86	N	N	WT
K0212102_1512	AAT1	258	S	L	Resistant
K0212102_1512	DHPS	437	A	A	WT
K0212110_1512	AAT1	258	S	L	Resistant
K0212110_1512	CRT	76	K	K	WT
K0212110_1512	DHFR	108	S	N	Resistant
K0212110_1512	DHPS	437	A	A	WT
K0212110_1512	K13	580	C	C	WT
K0212110_1512	MDR1	86	N	N	WT
K0222208_1611	AAT1	258	S	L	Resistant
K0222208_1611	CRT	76	K	K	WT
K0222208_1611	DHFR	108	S	N	Resistant
K0222208_1611	DHPS	437	A	A	WT
K0222208_1611	K13	580	C	C	WT
K0222208_1611	MDR1	86	N	Y	Resistant
K0222213_1612	AAT1	258	S	S	WT
K0222213_1612	MDR1	86	N	N	WT
K0222213_1701	AAT1	258	S	L	Resistant
K0222213_1701	DHFR	108	S	N	Resistant
K0222213_1701	MDR1	86	N	N	WT
K0232412_1701	AAT1	258	S	L	Resistant
K0232412_1701	CRT	76	K	T	Resistant
K0232412_1701	DHFR	108	S	N	Resistant
K0232412_1701	DHPS	437	A	G	Resistant
K0252713_1512	AAT1	258	S	L	Resistant
K0252713_1512	CRT	76	K	T	Resistant
K0252713_1512	DHFR	108	S	N	Resistant
K0252713_1512	DHPS	437	A	A	WT
K0252713_1512	K13	580	C	C	WT
K0252713_1512	MDR1	86	N	N	WT
K0252717_1512	AAT1	258	S	L	Resistant
K0252717_1512	CRT	76	K	T	Resistant
K0252717_1512	DHFR	108	S	N	Resistant
K0252717_1512	DHPS	437	A	G	Resistant
K0252717_1512	K13	580	C	C	WT
K0252717_1512	MDR1	86	N	Y	Resistant
K0252808_1611	AAT1	258	S	S	WT
K0252808_1611	CRT	76	K	K	WT
K0252808_1611	DHPS	437	A	G	Resistant
K0252808_1611	K13	580	C	C	WT
K0252808_1701	AAT1	258	S	L	Resistant
K0252808_1701	CRT	76	K	T	Resistant
K0252808_1701	DHFR	108	S	N	Resistant
K0252808_1701	DHPS	437	A	G	Resistant
K0252808_1701	K13	580	C	C	WT
K0252808_1701	MDR1	86	N	N	WT
K0262902_1511	AAT1	258	S	L	Resistant
K0262902_1511	CRT	76	K	K	WT
K0262902_1511	DHFR	108	S	N	Resistant
K0262902_1511	DHPS	437	A	G	Resistant
K0262902_1511	K13	580	C	C	WT
K0262902_1511	MDR1	86	N	N	WT
K0262913_1611	AAT1	258	S	L	Resistant
K0262913_1611	CRT	76	K	T	Resistant
K0262913_1611	DHFR	108	S	N	Resistant
K0262913_1611	DHPS	437	A	G,A	Mixed
K0262922_1612	AAT1	258	S	L	Resistant
K0262922_1612	CRT	76	K	T	Resistant
K0262922_1612	DHFR	108	S	N	Resistant
K0262922_1612	DHPS	437	A	G	Resistant
K0262922_1612	K13	580	C	C	WT
K0262922_1612	MDR1	86	N	N	WT
K0262922_1702	DHPS	437	A	G	Resistant
K0262922_1704	AAT1	258	S	L	Resistant
K0262922_1704	CRT	76	K	T	Resistant
K0262922_1704	DHFR	108	S	N	Resistant
K0262922_1704	DHPS	437	A	G	Resistant
K0262922_1704	K13	580	C	C	WT
K0262922_1704	MDR1	86	N	N	WT
K0262922_1705	AAT1	258	S	L	Resistant
K0262922_1705	CRT	76	K	T	Resistant
K0262922_1705	DHFR	108	S	N	Resistant
K0262922_1705	DHPS	437	A	G	Resistant
K0262922_1705	K13	580	C	C	WT
K0262922_1705	MDR1	86	N	N	WT
K0262940_1511	AAT1	258	S	L	Resistant
K0262940_1511	CRT	76	K	T	Resistant
K0262940_1511	DHFR	108	S	N	Resistant
K0262940_1511	DHPS	437	A	A	WT
K0262940_1511	K13	580	C	C	WT
K0262940_1511	MDR1	86	N	Y	Resistant
K0262940_1512	AAT1	258	S	L	Resistant
K0262940_1512	CRT	76	K	T	Resistant
K0262940_1512	DHFR	108	S	N	Resistant
K0262940_1512	DHPS	437	A	A	WT
K0262940_1512	K13	580	C	C	WT
K0262940_1512	MDR1	86	N	Y	Resistant
K0262940_1704	AAT1	258	S	L	Resistant
K0262940_1704	CRT	76	K	T	Resistant
K0262940_1704	DHFR	108	S	N	Resistant
K0262940_1704	DHPS	437	A	A	WT
K0263004_1511	AAT1	258	S	L	Resistant
K0263004_1511	CRT	76	K	K	WT
K0263004_1511	DHFR	108	S	N	Resistant
K0263004_1511	DHPS	437	A	G	Resistant
K0263004_1511	K13	580	C	C	WT
K0263004_1511	MDR1	86	N	N	WT
K0263004_1512	AAT1	258	S	L	Resistant
K0263004_1512	CRT	76	K	K	WT
K0263004_1512	DHFR	108	S	N	Resistant
K0263004_1512	DHPS	437	A	G	Resistant
K0263004_1512	K13	580	C	C	WT
K0263004_1512	MDR1	86	N	N	WT
K0263008_1612	CRT	76	K	T	Resistant
K0263008_1612	DHFR	108	S	N	Resistant
K0263008_1612	DHPS	437	A	A	WT
K0263008_1612	K13	580	C	C	WT
K0263008_1701	K13	580	C	C	WT
K0263008_1701	MDR1	86	N	N	WT
K0263008_1704	AAT1	258	S	L	Resistant
K0263008_1704	CRT	76	K	T	Resistant
K0263008_1704	DHFR	108	S	N	Resistant
K0263008_1704	DHPS	437	A	A	WT
K0263008_1704	K13	580	C	C	WT
K0263008_1704	MDR1	86	N	N	WT
K0263008_1705	AAT1	258	S	L	Resistant
K0263008_1705	CRT	76	K	T	Resistant
K0263008_1705	DHFR	108	S	N	Resistant
K0263008_1705	DHPS	437	A	A	WT
K0283406_1512	AAT1	258	S	L	Resistant
K0283406_1512	CRT	76	K	T	Resistant
K0283406_1512	DHFR	108	S	N	Resistant
K0283406_1512	DHPS	437	A	G,A	Mixed
K0283406_1512	K13	580	C	C	WT
K0283406_1512	MDR1	86	N	N	WT
K0323702_1611	AAT1	258	S	L	Resistant
K0323702_1611	CRT	76	K	T	Resistant
K0323702_1611	DHFR	108	S	N	Resistant
K0323702_1611	DHPS	437	A	G	Resistant
K0323702_1611	K13	580	C	C	WT
K0323702_1611	MDR1	86	N	N	WT
K0344032_1512	AAT1	258	S	S	WT
K0344032_1512	CRT	76	K	K	WT
K0344032_1512	DHFR	108	S	N	Resistant
K0344032_1512	DHPS	437	A	A	WT
K0344032_1512	K13	580	C	C	WT
K0344032_1512	MDR1	86	N	N	WT
K0364311_1511	AAT1	258	S	L	Resistant
K0364311_1511	CRT	76	K	K	WT
K0364311_1511	DHFR	108	S	N	Resistant
K0364311_1511	DHPS	437	A	G	Resistant
K0364311_1511	K13	580	C	C	WT
K0364311_1511	MDR1	86	N	N	WT
K0364314_1701	AAT1	258	S	L	Resistant
K0364314_1701	CRT	76	K	T	Resistant
K0364314_1701	DHFR	108	S	N	Resistant
K0364314_1701	DHPS	437	A	A	WT
K0364314_1701	K13	580	C	C	WT
K0364314_1701	MDR1	86	N	N	WT
K0364319_1511	AAT1	258	S	L	Resistant
K0364319_1511	CRT	76	K	T	Resistant
K0364319_1511	DHFR	108	S	S	WT
K0364319_1511	DHPS	437	A	G	Resistant
K0364319_1511	K13	580	C	C	WT
K0364319_1511	MDR1	86	N	N	WT
K0364319_1612	AAT1	258	S	L	Resistant
K0364319_1612	CRT	76	K	T	Resistant
K0364319_1612	DHFR	108	S	N	Resistant
K0364319_1612	DHPS	437	A	A	WT
K0364319_1612	K13	580	C	C	WT
K0364319_1612	MDR1	86	N	N	WT
K0364324_1701	AAT1	258	S	L	Resistant
K0364324_1701	CRT	76	K	T	Resistant
K0364324_1701	MDR1	86	N	N	WT
K0374406_1612	AAT1	258	S	L	Resistant
K0374406_1612	CRT	76	K	T	Resistant
K0374406_1612	DHFR	108	S	N	Resistant
K0374406_1612	DHPS	437	A	A	WT
K0374406_1701	DHFR	108	S	N	Resistant
K0374406_1701	DHPS	437	A	G	Resistant
K0374406_1701	K13	580	C	C	WT
K0374408_1412	AAT1	258	S	L	Resistant
K0374408_1412	CRT	76	K	K,T	Mixed
K0374408_1412	DHFR	108	S	N	Resistant
K0374408_1412	DHPS	437	A	A	WT
K0374408_1412	K13	580	C	C	WT
K0374408_1412	MDR1	86	N	N	WT
K0374413_1611	AAT1	258	S	L	Resistant
K0374413_1611	CRT	76	K	K	WT
K0374413_1611	DHFR	108	S	S,N	Mixed
K0374413_1611	DHPS	437	A	G,A	Mixed
K0374413_1611	K13	580	C	C	WT
K0374413_1611	MDR1	86	N	N	WT
K0374502_1412	AAT1	258	S	L	Resistant
K0374502_1412	CRT	76	K	T	Resistant
K0374502_1412	DHFR	108	S	N	Resistant
K0374502_1412	DHPS	437	A	A	WT
K0374502_1412	K13	580	C	C	WT
K0374502_1412	MDR1	86	N	N	WT
K0374502_1612	AAT1	258	S	L	Resistant
K0374502_1612	DHFR	108	S	N	Resistant
K0374502_1612	DHPS	437	A	A	WT
K0384601_1702	AAT1	258	S	L	Resistant
K0384601_1702	DHFR	108	S	N	Resistant
K0384601_1702	DHPS	437	A	G	Resistant
K0384602_1512	AAT1	258	S	L	Resistant
K0384602_1512	CRT	76	K	K	WT
K0384602_1512	DHFR	108	S	N	Resistant
K0384602_1512	DHPS	437	A	A	WT
K0384602_1512	K13	580	C	C	WT
K0384602_1512	MDR1	86	N	N	WT
K0384604_1511	AAT1	258	S	S	WT
K0384604_1511	CRT	76	K	K	WT
K0384604_1511	MDR1	86	N	N	WT
K0384611_1702	AAT1	258	S	L	Resistant
K0384611_1702	CRT	76	K	K	WT
K0384611_1702	DHFR	108	S	N	Resistant
K0384611_1702	DHPS	437	A	A	WT
K0384611_1702	K13	580	C	C	WT
K0384611_1702	MDR1	86	N	Y	Resistant
K0384611_1705	AAT1	258	S	L	Resistant
K0394906_1611	AAT1	258	S	L	Resistant
K0394906_1611	CRT	76	K	T	Resistant
K0394906_1611	DHFR	108	S	N	Resistant
K0394906_1611	DHPS	437	A	G	Resistant
K0394906_1611	K13	580	C	C	WT
K0394906_1611	MDR1	86	N	N	WT
K0394938_1611	AAT1	258	S	L	Resistant
K0394938_1611	CRT	76	K	T	Resistant
K0394938_1611	DHFR	108	S	N	Resistant
K0394938_1611	DHPS	437	A	G	Resistant
K0394938_1611	K13	580	C	C	WT
K0394938_1611	MDR1	86	N	N	WT
K0405016_1611	AAT1	258	S	L	Resistant
K0405016_1611	CRT	76	K	K,T	Mixed
K0405016_1611	DHFR	108	S	N	Resistant
K0405016_1611	DHPS	437	A	G	Resistant
K0405016_1611	K13	580	C	C	WT
K0405016_1611	MDR1	86	N	N	WT
K0415108_1701	AAT1	258	S	L	Resistant
K0415108_1701	CRT	76	K	T	Resistant
K0415108_1701	DHFR	108	S	N	Resistant
K0415108_1702	AAT1	258	S	L	Resistant
K0415108_1702	CRT	76	K	T	Resistant
K0425208_1512	AAT1	258	S	L	Resistant
K0425208_1512	CRT	76	K	T	Resistant
K0425208_1512	DHFR	108	S	N	Resistant
K0425208_1512	DHPS	437	A	G	Resistant
K0425208_1512	K13	580	C	C	WT
K0425208_1512	MDR1	86	N	Y	Resistant
N0050505_1610	AAT1	258	S	L	Resistant
N0050505_1610	K13	580	C	C	WT
N0131303_1701	AAT1	258	S	L	Resistant
N0131303_1701	CRT	76	K	T	Resistant
N0131303_1701	DHFR	108	S	N	Resistant
N0131303_1701	DHPS	437	A	G	Resistant
N0131303_1701	K13	580	C	C	WT
N0131303_1701	MDR1	86	N	N	WT
N0131318_1611	AAT1	258	S	L	Resistant
N0131318_1611	CRT	76	K	K	WT
N0131318_1611	DHFR	108	S	S,N	Mixed
N0131318_1611	DHPS	437	A	A	WT
N0131318_1611	K13	580	C	C	WT
N0131318_1611	MDR1	86	N	N	WT
N0131323_1610	AAT1	258	S	L	Resistant
N0131323_1610	CRT	76	K	T	Resistant
N0131323_1610	DHFR	108	S	N	Resistant
N0131323_1610	DHPS	437	A	G	Resistant
N0131323_1610	MDR1	86	N	N	WT
N0141403_1612	AAT1	258	S	L	Resistant
N0141403_1612	DHPS	437	A	G	Resistant
N0141403_1612	K13	580	C	C	WT
P0010104_1611	AAT1	258	S	L	Resistant
P0010104_1611	CRT	76	K	T	Resistant
P0010104_1611	DHFR	108	S	N	Resistant
P0010104_1611	DHPS	437	A	A	WT
P0010104_1611	K13	580	C	C	WT
P0010104_1611	MDR1	86	N	N	WT
P0010121_1611	DHFR	108	S	N	Resistant
P0010126_1611	AAT1	258	S	L	Resistant
P0010126_1611	DHPS	437	A	G	Resistant
P0010127_1610	AAT1	258	S	S	WT
P0010127_1610	CRT	76	K	K	WT
P0010127_1610	DHFR	108	S	N	Resistant
P0010127_1610	DHPS	437	A	A	WT
P0010127_1610	MDR1	86	N	N	WT
P0010137_1610	K13	580	C	C	WT
P0020206_1701	AAT1	258	S	L	Resistant
P0020206_1701	CRT	76	K	T	Resistant
P0020206_1701	DHFR	108	S	N	Resistant
P0020206_1701	DHPS	437	A	G	Resistant
P0020206_1701	K13	580	C	C	WT
P0020206_1701	MDR1	86	N	N	WT
P0020206_1702	AAT1	258	S	L	Resistant
P0020206_1702	CRT	76	K	T	Resistant
P0020206_1702	DHFR	108	S	N	Resistant
P0020206_1702	DHPS	437	A	A	WT
P0020206_1702	K13	580	C	C	WT
P0020206_1702	MDR1	86	N	N	WT
P0020206_1703	AAT1	258	S	L	Resistant
P0020206_1703	CRT	76	K	T	Resistant
P0020206_1703	DHFR	108	S	N	Resistant
P0020206_1703	DHPS	437	A	A	WT
P0020206_1703	K13	580	C	C	WT
P0020206_1703	MDR1	86	N	N	WT
P0020206_1704	AAT1	258	S	L	Resistant
P0020206_1704	DHPS	437	A	A	WT
P0020206_1704	K13	580	C	C	WT
P0020206_1705	AAT1	258	S	L	Resistant
P0020206_1705	CRT	76	K	T	Resistant
P0020206_1705	DHFR	108	S	N	Resistant
P0020206_1705	DHPS	437	A	A	WT
P0020206_1705	K13	580	C	C	WT
P0020206_1705	MDR1	86	N	N	WT
P0020213_1612	AAT1	258	S	L	Resistant
P0020213_1612	CRT	76	K	K	WT
P0020213_1612	DHFR	108	S	N	Resistant
P0020213_1612	DHPS	437	A	G	Resistant
P0020213_1612	K13	580	C	C	WT
P0020213_1612	MDR1	86	N	N	WT
P0020213_1701	AAT1	258	S	L	Resistant
P0020213_1701	CRT	76	K	K	WT
P0020213_1701	DHFR	108	S	N	Resistant
P0020213_1701	DHPS	437	A	G	Resistant
P0020213_1701	K13	580	C	C	WT
P0020213_1701	MDR1	86	N	N	WT
P0020213_1705	AAT1	258	S	L	Resistant
P0020213_1705	CRT	76	K	K	WT
P0020213_1705	DHFR	108	S	N	Resistant
P0020213_1705	DHPS	437	A	G	Resistant
P0020213_1705	K13	580	C	C	WT
P0020213_1705	MDR1	86	N	N	WT
P0020215_1701	AAT1	258	S	L	Resistant
P0020215_1701	CRT	76	K	T	Resistant
P0020215_1701	DHFR	108	S	N	Resistant
P0020215_1701	DHPS	437	A	A	WT
P0020215_1701	K13	580	C	C	WT
P0020215_1701	MDR1	86	N	N	WT
P0030304_1607	AAT1	258	S	L	Resistant
P0030304_1607	CRT	76	K	T	Resistant
P0030304_1607	DHFR	108	S	N	Resistant
P0030304_1607	DHPS	437	A	G	Resistant
P0030304_1607	MDR1	86	N	N,Y	Mixed
P0050504_1611	AAT1	258	S	L	Resistant
P0050504_1611	CRT	76	K	T	Resistant
P0050504_1611	DHFR	108	S	N	Resistant
P0050504_1611	DHPS	437	A	G	Resistant
P0050504_1611	K13	580	C	C	WT
P0050504_1611	MDR1	86	N	N	WT
P0050514_1611	AAT1	258	S	L	Resistant
P0050514_1611	CRT	76	K	T	Resistant
P0050514_1611	DHFR	108	S	N	Resistant
P0050514_1611	DHPS	437	A	A	WT
P0050514_1611	K13	580	C	C	WT
P0050514_1611	MDR1	86	N	N	WT
P0050519_1705	AAT1	258	S	L	Resistant
P0050519_1705	CRT	76	K	T	Resistant
P0050519_1705	DHFR	108	S	S	WT
P0050519_1705	DHPS	437	A	A	WT
P0050519_1705	K13	580	C	C	WT
P0060609_1611	AAT1	258	S	S	WT
P0060609_1611	CRT	76	K	K	WT
P0060609_1611	DHFR	108	S	N	Resistant
P0060609_1611	DHPS	437	A	A	WT
P0060609_1611	K13	580	C	C	WT
P0060609_1611	MDR1	86	N	N	WT
P0060616_1611	AAT1	258	S	L	Resistant
P0060616_1611	CRT	76	K	K	WT
P0060616_1611	DHFR	108	S	N	Resistant
P0060616_1611	DHPS	437	A	G	Resistant
P0060616_1611	K13	580	C	C	WT
P0060616_1611	MDR1	86	N	N	WT
P0060620_1611	AAT1	258	S	L	Resistant
P0060620_1611	CRT	76	K	T	Resistant
P0060620_1611	DHFR	108	S	N	Resistant
P0060620_1611	DHPS	437	A	G,A	Mixed
P0060620_1611	K13	580	C	C	WT
P0060620_1611	MDR1	86	N	N	WT
P0060622_1611	AAT1	258	S	L	Resistant
P0060622_1611	CRT	76	K	T	Resistant
P0060622_1611	DHFR	108	S	N	Resistant
P0060622_1611	DHPS	437	A	A	WT
P0060622_1611	K13	580	C	C	WT
P0060622_1611	MDR1	86	N	N	WT
P0060623_1612	AAT1	258	S	L	Resistant
P0060623_1612	CRT	76	K	T	Resistant
P0060623_1612	DHFR	108	S	S,N	Mixed
P0060623_1612	DHPS	437	A	G,A	Mixed
P0060623_1612	K13	580	C	C	WT
P0060623_1612	MDR1	86	N	N	WT
P0060623_1702	AAT1	258	S	L	Resistant
P0060623_1702	CRT	76	K	T	Resistant
P0060623_1702	DHFR	108	S	N	Resistant
P0060623_1702	DHPS	437	A	A	WT
P0060623_1702	K13	580	C	C	WT
P0060623_1702	MDR1	86	N	N	WT
P0060623_1703	AAT1	258	S	L	Resistant
P0060623_1703	CRT	76	K	T	Resistant
P0060623_1703	DHFR	108	S	N	Resistant
P0060623_1703	DHPS	437	A	A	WT
P0060623_1703	K13	580	C	C	WT
P0060623_1703	MDR1	86	N	N	WT
P0060623_1704	AAT1	258	S	L	Resistant
P0060623_1704	CRT	76	K	T	Resistant
P0060623_1704	DHFR	108	S	N	Resistant
P0060623_1704	DHPS	437	A	A	WT
P0060623_1704	K13	580	C	C	WT
P0060623_1704	MDR1	86	N	N	WT
P0060623_1705	AAT1	258	S	L	Resistant
P0060623_1705	CRT	76	K	T	Resistant
P0060623_1705	DHFR	108	S	N	Resistant
P0060623_1705	DHPS	437	A	A	WT
P0060623_1705	K13	580	C	C	WT
P0060623_1705	MDR1	86	N	N	WT
P0070705_1611	AAT1	258	S	S	WT
P0070705_1611	CRT	76	K	T	Resistant
P0070705_1611	DHFR	108	S	N	Resistant
P0070705_1611	DHPS	437	A	A	WT
P0070705_1611	K13	580	C	C	WT
P0070705_1611	MDR1	86	N	N	WT
P0070707_1610	CRT	76	K	K	WT
P0070710_1607	AAT1	258	S	L	Resistant
P0070710_1607	CRT	76	K	K	WT
P0070710_1607	DHFR	108	S	N	Resistant
P0070710_1607	DHPS	437	A	A	WT
P0070710_1607	K13	580	C	C	WT
P0070710_1607	MDR1	86	N	N	WT
P0070722_1612	AAT1	258	S	L	Resistant
P0070722_1612	CRT	76	K	T	Resistant
P0070722_1612	DHFR	108	S	N	Resistant
P0070722_1612	DHPS	437	A	G	Resistant
P0070722_1612	K13	580	C	C	WT
P0070722_1612	MDR1	86	N	N	WT
P0070722_1701	AAT1	258	S	L	Resistant
P0070722_1701	CRT	76	K	T	Resistant
P0070722_1701	DHFR	108	S	N	Resistant
P0070722_1701	DHPS	437	A	G	Resistant
P0070722_1701	K13	580	C	C	WT
P0070722_1701	MDR1	86	N	N	WT
P0070722_1702	AAT1	258	S	L	Resistant
P0070722_1702	CRT	76	K	T	Resistant
P0070722_1702	DHFR	108	S	N	Resistant
P0070722_1702	DHPS	437	A	G	Resistant
P0070722_1702	K13	580	C	C	WT
P0070722_1702	MDR1	86	N	N	WT
P0080805_1612	AAT1	258	S	L	Resistant
P0080805_1612	CRT	76	K	K	WT
P0080805_1612	DHFR	108	S	N	Resistant
P0080805_1612	DHPS	437	A	G	Resistant
P0080805_1612	K13	580	C	C	WT
P0080805_1612	MDR1	86	N	N	WT
P0080805_1705	AAT1	258	S	L	Resistant
P0080805_1705	CRT	76	K	K	WT
P0080805_1705	DHFR	108	S	N	Resistant
P0080805_1705	DHPS	437	A	G	Resistant
P0080805_1705	K13	580	C	C	WT
P0080805_1705	MDR1	86	N	N	WT
P0080836_1612	AAT1	258	S	L	Resistant
P0080836_1612	CRT	76	K	T	Resistant
P0080836_1612	DHFR	108	S	N	Resistant
P0080836_1612	DHPS	437	A	G	Resistant
P0080836_1612	K13	580	C	C	WT
P0080836_1612	MDR1	86	N	N	WT
P0080836_1701	AAT1	258	S	L	Resistant
P0080836_1701	CRT	76	K	T	Resistant
P0080836_1701	DHFR	108	S	N	Resistant
P0080836_1701	DHPS	437	A	G	Resistant
P0080836_1701	K13	580	C	C	WT
P0080836_1701	MDR1	86	N	N	WT
P0080840_1611	AAT1	258	S	L	Resistant
P0080840_1611	CRT	76	K	T	Resistant
P0080842_1612	AAT1	258	S	L	Resistant
P0080842_1612	CRT	76	K	T	Resistant
P0080842_1612	DHFR	108	S	N	Resistant
P0080842_1612	DHPS	437	A	G	Resistant
P0080842_1612	K13	580	C	C	WT
P0080842_1612	MDR1	86	N	N	WT
P0080842_1703	AAT1	258	S	L	Resistant
P0080842_1703	DHFR	108	S	N	Resistant
P0080842_1703	DHPS	437	A	G,A	Mixed
P0080842_1703	K13	580	C	C	WT
P0080842_1704	AAT1	258	S	L	Resistant
P0080842_1704	CRT	76	K	K,T	Mixed
P0080842_1704	DHFR	108	S	N	Resistant
P0080842_1704	DHPS	437	A	G,A	Mixed
P0080842_1704	K13	580	C	C	WT
P0080842_1704	MDR1	86	N	N	WT
P0080842_1705	AAT1	258	S	L	Resistant
P0080842_1705	CRT	76	K	K,T	Mixed
P0080842_1705	DHFR	108	S	N	Resistant
P0080842_1705	DHPS	437	A	G	Resistant
P0080842_1705	K13	580	C	C	WT
P0080842_1705	MDR1	86	N	N	WT
P0080843_1611	AAT1	258	S	L	Resistant
P0080843_1611	CRT	76	K	T	Resistant
P0080843_1611	DHFR	108	S	N	Resistant
P0080843_1611	DHPS	437	A	A	WT
P0080843_1611	K13	580	C	C	WT
P0080843_1611	MDR1	86	N	N	WT
P0080854_1611	AAT1	258	S	L	Resistant
P0080854_1611	CRT	76	K	T	Resistant
P0080854_1611	DHFR	108	S	N	Resistant
P0080854_1611	DHPS	437	A	G	Resistant
P0080854_1611	K13	580	C	C	WT
P0080854_1611	MDR1	86	N	N	WT
P0080857_1702	AAT1	258	S	L	Resistant
P0080857_1702	DHPS	437	A	G	Resistant
P0080857_1702	K13	580	C	C	WT
P0080880_1612	AAT1	258	S	L	Resistant
P0080880_1612	CRT	76	K	T	Resistant
P0080880_1612	DHFR	108	S	N	Resistant
P0080880_1612	DHPS	437	A	A	WT
P0080880_1612	K13	580	C	C	WT
P0111104_1611	AAT1	258	S	L	Resistant
P0111104_1611	CRT	76	K	T	Resistant
P0111104_1611	DHFR	108	S	N	Resistant
P0111104_1611	DHPS	437	A	A	WT
P0111104_1611	K13	580	C	C	WT
P0111104_1611	MDR1	86	N	N	WT
P0111105_1701	CRT	76	K	T	Resistant
P0111105_1701	K13	580	C	C	WT
P0111106_1611	AAT1	258	S	L	Resistant
P0111106_1611	CRT	76	K	T	Resistant
P0111106_1611	DHFR	108	S	N	Resistant
P0111106_1611	DHPS	437	A	A	WT
P0111106_1611	K13	580	C	C	WT
P0111106_1611	MDR1	86	N	N	WT
P0121204_1703	DHFR	108	S	N	Resistant
P0121204_1703	DHPS	437	A	G	Resistant
P0121204_1704	DHFR	108	S	N	Resistant
P0121204_1704	DHPS	437	A	G	Resistant
P0121204_1705	AAT1	258	S	L	Resistant
P0121204_1705	CRT	76	K	K	WT
P0121204_1705	DHFR	108	S	N	Resistant
P0121204_1705	DHPS	437	A	G	Resistant
P0121204_1705	K13	580	C	C	WT
