# Supplementary material for: Household clustering and seasonal genetic variation of Plasmodium falciparum at the community-level in The Gambia
Source: eLife. 2025 May 27;13:RP103047. doi: 10.7554/eLife.103047 (PMC12113269; doi:10.7554/eLife.103047)
Supplement: Supplementary file 10. [file elife-103047-supp10.xlsx]

## Sheet: TS10 - Duration of infection
Subject_ID	Estimated duration of continuous infection (days)	Estimated start of continuous infection (YYYY-MM)	Estimated end of continuous infection (YYYY-MM)	Rank in figure 6
K0262940	486	2015-11	2017-03	1
K0090903	214	2016-03	2016-10	2
J0272813	212	2016-10	2017-05	3
J0262707	182	2014-12	2015-06	4
K0030303	182	2015-11	2016-05	5
K0273207	182	2015-11	2016-05	6
J0272815	181	2016-11	2017-05	7
K0181810	151	2016-12	2017-05	8
K0262922	151	2016-12	2017-05	9
K0263008	151	2016-12	2017-05	10
P0020213	151	2016-12	2017-05	11
P0080805	151	2016-12	2017-05	12
P0121204	151	2016-12	2017-05	13
K0232412	121	2016-12	2017-04	14
K0263004	121	2015-11	2016-03	15
J0030406	120	2017-01	2017-05	16
P0050519	120	2017-01	2017-05	17
K0171716	90	2016-12	2017-03	18
P0080842	90	2016-12	2017-03	19
P0070722	62	2016-12	2017-02	20
K0141403	61	2015-04	2015-06	21
K0212109	61	2015-04	2015-06	22
K0303507	61	2016-05	2016-07	23
P0020206	59	2017-02	2017-04	24
P0020206	61	2017-03	2017-05	24
P0060623	59	2017-02	2017-04	25
P0060623	61	2017-03	2017-05	25
J0101103	59	2017-01	2017-03	26
J0282916	59	2017-01	2017-03	27
K0171742	31	2016-12	2017-01	28
P0080836	31	2016-12	2017-01	29
J0272809	30	2016-11	2016-12	30
K0030302	30	2015-11	2015-12	31
K0252717	30	2015-11	2015-12	32
